# Supplementary material
Source: Research Square preprint supplement (doi:10.21203/rs.3.rs-7076613/v1)
Supplement: Supplementary file 1 [file 3f488506b141474b34e6df2b.xlsx]

## Sheet: Ebolavirus & Marburgvirus
Sp.	Publication	Field Study	Reservoir evidence	Notes
aselliscus stoliczkanus	Genetically Diverse Filoviruses in Rousettus and Eonycteris spp. Bats, China, 2009 and 2015	Y	none
carollia perspicillata	Evolution and Antiviral Specificities of Interferon-Induced Mx Proteins of Bats against Ebola, Influenza, and Other RNA Viruses	N
cercopithecus ascanius	ANTIBODIES TO HEMORRHAGIC-FEVER VIRUSES AND TO SELECTED ARBOVIRUSES IN MONKEYS FROM THE CENTRAL-AFRICAN-REPUBLIC	Y	none
cercopithecus mona	ANTIBODIES TO HEMORRHAGIC-FEVER VIRUSES AND TO SELECTED ARBOVIRUSES IN MONKEYS FROM THE CENTRAL-AFRICAN-REPUBLIC	Y	none
cercopithecus nictitans	ANTIBODIES TO HEMORRHAGIC-FEVER VIRUSES AND TO SELECTED ARBOVIRUSES IN MONKEYS FROM THE CENTRAL-AFRICAN-REPUBLIC	Y	none
chaerephon pumilus	Bombali Virus in Mops condylurus Bats, Guinea	Y	potential maintenance
chaerephon pumilus	Searching for the source of Ebola: the elusive factors driving its spillover into humans during the West African outbreak of 2013-2016	N
chaerephon pumilus	The discovery of Bombali virus adds further support for bats as hosts of ebolaviruses	Y	potential maintenance
chlorocebus aethiops	Recombinant Lloviu virus as a tool to study viral replication and host responses	N
chlorocebus aethiops	Serological Evidence of Filovirus Infection in Nonhuman Primates in Zambia	N
chlorocebus aethiops	Single-dose live-attenuated Nipah virus vaccines confer complete protection by eliciting antibodies directed against surface glycoproteins	N
chlorocebus aethiops	Establishment of Fruit Bat Cells (Rousettus aegyptiacus) as a Model System for the Investigation of Filoviral Infection	N
chlorocebus aethiops	Disease modeling for Ebola and Marburg viruses	N
chlorocebus aethiops	Focus on research: Marburg hemorrhagic fever - The forgotten cousin strikes	N
chlorocebus aethiops	Persistent infection with Ebola virus under conditions of partial immunity	N
chlorocebus aethiops	Emergence of subtype Zaire Ebola virus in Gabon	N
chlorocebus aethiops	ANTIBODIES TO HEMORRHAGIC-FEVER VIRUSES AND TO SELECTED ARBOVIRUSES IN MONKEYS FROM THE CENTRAL-AFRICAN-REPUBLIC	Y	none
chlorocebus pygerythrus	Ecological Traits Driving the Outbreaks and Emergence of Zoonotic Pathogens	N
cynomys ludovicianus	Ecological Traits Driving the Outbreaks and Emergence of Zoonotic Pathogens	N
cynopterus brachyotis	Serologic Evidence of Fruit Bat Exposure to Filoviruses, Singapore, 2011-2016	Y	none
eidolon helvum	Dynamics of Antibodies to Ebolaviruses in an Eidolon helvum Bat Colony in Cameroon	Y	none
eidolon helvum	Bats as putative Zaire ebolavirus reservoir hosts and their habitat suitability in Africa	N
eidolon helvum	Role of Wildlife in Emergence of Ebola Virus in Kaigbono (Likati), Democratic Republic of the Congo, 2017	Y	none
eidolon helvum	Human activities link fruit bat presence to Ebola virus disease outbreaks	Y	none
eidolon helvum	Comparative analysis of serologic cross-reactivity using convalescent sera from filovirus-experimentally infected fruit bats	N
eidolon helvum	Understanding Ebola virus and other zoonotic transmission risks through human-bat contacts: Exploratory study on knowledge, attitudes and practices in Southern Cameroon	N
eidolon helvum	Survey of Ebola Viruses in Frugivorous and Insectivorous Bats in Guinea, Cameroon, and the Democratic Republic of the Congo, 2015-2017	Y	potential maintenance
eidolon helvum	Evolution and Antiviral Specificities of Interferon-Induced Mx Proteins of Bats against Ebola, Influenza, and Other RNA Viruses	N
eidolon helvum	Comparative phylogeography of African fruit bats (Chiroptera, Pteropodidae) provide new insights into the outbreak of Ebola virus disease in West Africa, 2014-2016	N
eidolon helvum	Assessing the Evidence Supporting Fruit Bats as the Primary Reservoirs for Ebola Viruses	N
eidolon helvum	Seroepidemiological Prevalence of Multiple Species of Filoviruses in Fruit Bats (Eidolon helvum) Migrating in Africa	Y	potential maintenance
eidolon helvum	Ebola Virus Antibodies in Fruit Bats, Ghana, West Africa	N
eidolon helvum	Long-Term Survival of an Urban Fruit Bat Seropositive for Ebola and Lagos Bat Viruses	Y	none
eonycteris spelaea	Filovirus-reactive antibodies in humans and bats in Northeast India imply zoonotic spillover	Y	none
eonycteris spelaea	Characterization of a filovirus (Mengla virus) from Rousettus bats in China	N	non target genus
eonycteris spelaea	Serologic Evidence of Fruit Bat Exposure to Filoviruses, Singapore, 2011-2016	Y	just serological
eonycteris spelaea	Genetically Diverse Filoviruses in Rousettus and Eonycteris spp. Bats, China, 2009 and 2015	Y	potential maintenance
epomophorus gambianus	Bats as putative Zaire ebolavirus reservoir hosts and their habitat suitability in Africa	N
epomophorus gambianus	Survey of Ebola Viruses in Frugivorous and Insectivorous Bats in Guinea, Cameroon, and the Democratic Republic of the Congo, 2015-2017	Y	none
epomophorus gambianus	Comparative phylogeography of African fruit bats (Chiroptera, Pteropodidae) provide new insights into the outbreak of Ebola virus disease in West Africa, 2014-2016	N
epomophorus gambianus	Assessing the Evidence Supporting Fruit Bats as the Primary Reservoirs for Ebola Viruses	N
epomophorus gambianus	Ebola, Bats and Evidence-Based Policy Informing Ebola Policy	N
epomophorus gambianus	Ebola Virus Antibodies in Fruit Bats, Ghana, West Africa	Y
epomophorus labiatus	Range Expansion of Bomba Virus in Mops condylurus Bats, Kenya, 2019	N
epomophorus wahlbergi	Searching for the source of Ebola: the elusive factors driving its spillover into humans during the West African outbreak of 2013-2016	N
epomophorus wahlbergi	Experimental inoculation of plants and animals with Ebola virus	N
epomops buettikoferi	Ebola Virus Antibodies in Fruit Bats, Ghana, West Africa	Y	none
epomops buettikoferi	Comparative phylogeography of African fruit bats (Chiroptera, Pteropodidae) provide new insights into the outbreak of Ebola virus disease in West Africa, 2014-2016	N
epomops buettikoferi	Comparative Analysis of Ebola Virus Glycoprotein Interactions With Human and Bat Cells	N
epomops franqueti	Bats as putative Zaire ebolavirus reservoir hosts and their habitat suitability in Africa	N
epomops franqueti	Human activities link fruit bat presence to Ebola virus disease outbreaks	Y	none
epomops franqueti	Comparative phylogeography of African fruit bats (Chiroptera, Pteropodidae) provide new insights into the outbreak of Ebola virus disease in West Africa, 2014-2016	N
epomops franqueti	Assessing the Evidence Supporting Fruit Bats as the Primary Reservoirs for Ebola Viruses	N
epomops franqueti	Ebola Virus Antibodies in Fruit Bats, Ghana, West Africa	Y	none
epomops franqueti	Bats and other reservoir hosts of Filoviridae. Danger of epidemic on the African continent? - A deductive literature analysis	N
epomops franqueti	Large serological survey showing cocirculation of Ebola and Marburg viruses in Gabonese bat populations, and a high seroprevalence of both viruses in Rousettus aegyptiacus	Y	potential maintenance
epomops franqueti	Spatial and temporal patterns of Zaire ebolavirus antibody prevalence in the possible reservoir bat species	Y	potential maintenance
epomops franqueti	Ebolavirus and other Filoviruses	Y	none
epomops franqueti	Recent common ancestry of Ebola Zaire virus found in a bat reservoir	N
epomops franqueti	Fruit bats as reservoirs of Ebola virus	Y	none
eptesicus fuscus	North American Big Brown Bats (Eptesicus fuscus) Harbor an Exogenous Deltaretrovirus	N
eptesicus fuscus	Broad and Temperature Independent Replication Potential of Filoviruses on Cells Derived From Old and New World Bat Species	N
eptesicus fuscus	Metagenomic Analysis of the Viromes of Three North American Bat Species: Viral Diversity among Different Bat Species That Share a Common Habitat	N
eptesicus serotinus	Public health awareness of emerging zoonotic viruses of bats: A European perspective	N
erythrocebus patas	ANTIBODIES TO HEMORRHAGIC-FEVER VIRUSES AND TO SELECTED ARBOVIRUSES IN MONKEYS FROM THE CENTRAL-AFRICAN-REPUBLIC	Y	none
gorilla gorilla	Detection of Ebola Virus Antibodies in Fecal Samples of Great Apes in Gabon	Y	not reservoirs
gorilla gorilla	Exploring the human-animal interface of Ebola virus disease outbreaks	N
gorilla gorilla	Using demographic characteristics of populations to detect spatial fragmentation following suspected ebola outbreaks in great apes	N
gorilla gorilla	Ebola in great apes - current knowledge, possibilities for vaccination, and implications for conservation and human health	N
gorilla gorilla	Wave-like spread of Ebola Zaire	N
gorilla gorilla	Isolates of Zaire ebolavirus from wild apes reveal genetic lineage and recombinants	Y	none
gorilla gorilla	Ebola outbreak killed 5000 gorillas	N
gorilla gorilla	Fruit bats as reservoirs of Ebola virus	N
gorilla gorilla	Ebola and great apes in Central Africa: current status and future needs	N
gorilla gorilla	Multiple Ebola virus haemorrhagic fever outbreaks in Gabon, from October 2001 to April 2002]., Plusieurs epidemies de fievre hemorragique due au virus Ebola au Gabon, d'octobre 2001 a avril 2002	N
gorilla gorilla	Epidemiology - Ebola outbreaks may have had independent sources	N
gorilla gorilla	Multiple Ebola virus transmission events and rapid decline of central African wildlife	Y	none
hipposideros armiger	Genetically Diverse Filoviruses in Rousettus and Eonycteris spp. Bats, China, 2009 and 2015	N
hypsignathus monstrosus	Bats as putative Zaire ebolavirus reservoir hosts and their habitat suitability in Africa	N
hypsignathus monstrosus	Lek-associated movement of a putative Ebolavirus reservoir, the hammer-headed fruit bat (Hypsignathus monstrosus), in northern Republic of Congo	N
hypsignathus monstrosus	Survey of Ebola Viruses in Frugivorous and Insectivorous Bats in Guinea, Cameroon, and the Democratic Republic of the Congo, 2015-2017	Y	potential maintenance
hypsignathus monstrosus	Evolution and Antiviral Specificities of Interferon-Induced Mx Proteins of Bats against Ebola, Influenza, and Other RNA Viruses	N
hypsignathus monstrosus	Comparative phylogeography of African fruit bats (Chiroptera, Pteropodidae) provide new insights into the outbreak of Ebola virus disease in West Africa, 2014-2016	N
hypsignathus monstrosus	Broad and Temperature Independent Replication Potential of Filoviruses on Cells Derived From Old and New World Bat Species	N
hypsignathus monstrosus	Assessing the Evidence Supporting Fruit Bats as the Primary Reservoirs for Ebola Viruses	N
hypsignathus monstrosus	Ebola Virus Antibodies in Fruit Bats, Ghana, West Africa	Y	none
hypsignathus monstrosus	Bats and other reservoir hosts of Filoviridae. Danger of epidemic on the African continent? - A deductive literature analysis	N
hypsignathus monstrosus	Long-Term Survival of an Urban Fruit Bat Seropositive for Ebola and Lagos Bat Viruses	Y	none
hypsignathus monstrosus	Large serological survey showing cocirculation of Ebola and Marburg viruses in Gabonese bat populations, and a high seroprevalence of both viruses in Rousettus aegyptiacus	Y	potential maintenance
hypsignathus monstrosus	Spatial and temporal patterns of Zaire ebolavirus antibody prevalence in the possible reservoir bat species	Y	potential maintenance
hypsignathus monstrosus	Ebolavirus and other Filoviruses	Y	none
hypsignathus monstrosus	Recent common ancestry of Ebola Zaire virus found in a bat reservoir	N
hypsignathus monstrosus	Fruit bats as reservoirs of Ebola virus	Y	none
Ia io	Genetically Diverse Filoviruses in Rousettus and Eonycteris spp. Bats, China, 2009 and 2015	Y	none
lissonycteris angolensis	Bats as putative Zaire ebolavirus reservoir hosts and their habitat suitability in Africa	N
lissonycteris angolensis	Survey of Ebola Viruses in Frugivorous and Insectivorous Bats in Guinea, Cameroon, and the Democratic Republic of the Congo, 2015-2017	Y	potential maintenance
lissonycteris angolensis	Molecular systematics and phylogeography of the tribe Myonycterini (Mammalia, Pteropodidae) inferred from mitochondrial and nuclear markers	N
macaca fascicularis	Insights into Reston virus spillovers and adaption from virus whole genome sequences	N
macaca fascicularis	Transmission of Ebola virus from pigs to non-human primates	N
macaca fascicularis	Ebola outbreak has experts rooting for answers	N
macaca fascicularis	Disease modeling for Ebola and Marburg viruses	N
macaca fascicularis	An introduction to Ebola: The virus and the disease	N
macaca fascicularis	PRELIMINARY-REPORT - ISOLATION OF EBOLA VIRUS FROM MONKEYS IMPORTED TO USA	Y	none
macaca mulatta	Identification and pathological characterization of persistent asymptomatic Ebola virus infection in rhesus monkeys	N
macaca mulatta	A model for mapping of Ebola and Marburg RNA integration sites in rhesus Macaca mulatta genome in silico: Ebola virus acceptors sites located on chromosomes 4, 6, 7, 8, 9, 14 and 15	N
macaca mulatta	Disease modeling for Ebola and Marburg viruses	N
megaderma lyra	Ebola Virus Antibodies in Fruit Bats, Bangladesh	Y	none
megaloglossus woermanni	Human activities link fruit bat presence to Ebola virus disease outbreaks	N
megaloglossus woermanni	Molecular systematics and phylogeography of the tribe Myonycterini (Mammalia, Pteropodidae) inferred from mitochondrial and nuclear markers	N
micropteropus pusillus	Bats as putative Zaire ebolavirus reservoir hosts and their habitat suitability in Africa	N
micropteropus pusillus	Human activities link fruit bat presence to Ebola virus disease outbreaks	N
micropteropus pusillus	Survey of Ebola Viruses in Frugivorous and Insectivorous Bats in Guinea, Cameroon, and the Democratic Republic of the Congo, 2015-2017	Y	none
micropteropus pusillus	Comparative phylogeography of African fruit bats (Chiroptera, Pteropodidae) provide new insights into the outbreak of Ebola virus disease in West Africa, 2014-2016	N
micropteropus pusillus	Assessing the Evidence Supporting Fruit Bats as the Primary Reservoirs for Ebola Viruses	N
micropteropus pusillus	Large serological survey showing cocirculation of Ebola and Marburg viruses in Gabonese bat populations, and a high seroprevalence of both viruses in Rousettus aegyptiacus	Y	potential maintenance
miniopterus schreibersii	Molecular evidence of Ebola Reston virus infection in Philippine bats	Y	none
miniopterus schreibersii	Discovery of an Ebolavirus-Like Filovirus in Europe	N
mops condylurus	Tolerance and Persistence of Ebola Virus in Primary Cells from Mops condylurus, a Potential Ebola Virus Reservoir	N
mops condylurus	Bats as putative Zaire ebolavirus reservoir hosts and their habitat suitability in Africa	N
mops condylurus	Development of a multiplex microsphere immunoassay for the detection of antibodies against highly pathogenic viruses in human and animal serum samples	N
mops condylurus	Metagenomic Snapshots of Viral Components in Guinean Bats	N
mops condylurus	Range Expansion of Bomba Virus in Mops condylurus Bats, Kenya, 2019	Y	none
mops condylurus	Utility of primary cells to examine NPC1 receptor expression in Mops condylurus, a potential Ebola virus reservoir	N
mops condylurus	Dendritic Cells Generated From Mops condylurus, a Likely Filovirus Reservoir Host, Are Susceptible to and Activated by Zaire Ebolavirus Infection	N
mops condylurus	Bombali Virus in Mops condylurus Bats, Guinea	Y	potential maintenance
mops condylurus	Searching for the source of Ebola: the elusive factors driving its spillover into humans during the West African outbreak of 2013-2016	N
mops condylurus	The discovery of Bombali virus adds further support for bats as hosts of ebolaviruses	Y	none
mops condylurus	Investigating the zoonotic origin of the West African Ebola epidemic	N
mops condylurus	Large serological survey showing cocirculation of Ebola and Marburg viruses in Gabonese bat populations, and a high seroprevalence of both viruses in Rousettus aegyptiacus	Y	none
mops condylurus	Experimental inoculation of plants and animals with Ebola virus	N
myonycteris torquata	Bats as putative Zaire ebolavirus reservoir hosts and their habitat suitability in Africa	N
myonycteris torquata	Comparative phylogeography of African fruit bats (Chiroptera, Pteropodidae) provide new insights into the outbreak of Ebola virus disease in West Africa, 2014-2016	N
myonycteris torquata	Assessing the Evidence Supporting Fruit Bats as the Primary Reservoirs for Ebola Viruses	N
myonycteris torquata	Molecular systematics and phylogeography of the tribe Myonycterini (Mammalia, Pteropodidae) inferred from mitochondrial and nuclear markers	N
myonycteris torquata	Bats and other reservoir hosts of Filoviridae. Danger of epidemic on the African continent? - A deductive literature analysis	N
myonycteris torquata	Large serological survey showing cocirculation of Ebola and Marburg viruses in Gabonese bat populations, and a high seroprevalence of both viruses in Rousettus aegyptiacus	Y	potential maintenance
myonycteris torquata	Spatial and temporal patterns of Zaire ebolavirus antibody prevalence in the possible reservoir bat species	Y	potential maintenance
myonycteris torquata	Ebolavirus and other Filoviruses	Y	none
myonycteris torquata	Fruit bats as reservoirs of Ebola virus	N
myotis dasycneme	Public health awareness of emerging zoonotic viruses of bats: A European perspective	N
myotis daubentonii	Evolution and Antiviral Specificities of Interferon-Induced Mx Proteins of Bats against Ebola, Influenza, and Other RNA Viruses	N
myotis daubentonii	Comparative Analysis of Ebola Virus Glycoprotein Interactions With Human and Bat Cells	N
myotis daubentonii	Public health awareness of emerging zoonotic viruses of bats: A European perspective	N
myotis lucifugus	Metagenomic Analysis of the Viromes of Three North American Bat Species: Viral Diversity among Different Bat Species That Share a Common Habitat	N
myotis ricketti	Genetically Diverse Filoviruses in Rousettus and Eonycteris spp. Bats, China, 2009 and 2015	Y	none
myotis septentrionalis	Metagenomic Analysis of the Viromes of Three North American Bat Species: Viral Diversity among Different Bat Species That Share a Common Habitat	N
nyctinomops laticaudatus	Coronaviruses in bats from Mexico	N
odocoileus virginianus	Crossing the Interspecies Barrier: Opening the Door to Zoonotic Pathogens	N
pan troglodytes	Detection of Ebola Virus Antibodies in Fecal Samples of Great Apes in Gabon	Y	none
pan troglodytes	Extensive Serological Survey of Multiple African Nonhuman Primate Species Reveals Low Prevalence of Immunoglobulin G Antibodies to 4 Ebola Virus Species	Y	none
pan troglodytes	Exploring the human-animal interface of Ebola virus disease outbreaks	N
pan troglodytes	Ebola in great apes - current knowledge, possibilities for vaccination, and implications for conservation and human health	N
pan troglodytes	Wave-like spread of Ebola Zaire	N
pan troglodytes	Isolates of Zaire ebolavirus from wild apes reveal genetic lineage and recombinants	Y	none
pan troglodytes	Fruit bats as reservoirs of Ebola virus	N
pan troglodytes	Ebola and great apes in Central Africa: current status and future needs	N
pan troglodytes	A serological survey of Ebola virus infection in central African nonhuman primates	Y	high seroprevalence
pan troglodytes	Epidemiology - Ebola outbreaks may have had independent sources	N
pan troglodytes	Multiple Ebola virus transmission events and rapid decline of central African wildlife	Y	none
pan troglodytes	Ebola virus outbreak among wild chimpanzees living in a rain forest of Cote d'Ivoire	Y	none
pan troglodytes	Ebola virus outbreaks in the Ivory Coast and Liberia, 1994-1995	N
pan troglodytes	ISOLATION AND PARTIAL CHARACTERIZATION OF A NEW STRAIN OF EBOLA VIRUS	N
pan troglodytes	EMERGING VIRUSES - CHIMPANZEE OUTBREAK HEATS UP SEARCH FOR EBOLA ORIGIN	N
papio cynocephalus	erological Evidence of Filovirus Infection in Nonhuman Primates in Zambia	N
papio cynocephalus	ANTIBODIES TO HEMORRHAGIC-FEVER VIRUSES AND TO SELECTED ARBOVIRUSES IN MONKEYS FROM THE CENTRAL-AFRICAN-REPUBLIC	N
peromyscus maniculatus	Crossing the Interspecies Barrier: Opening the Door to Zoonotic Pathogens	N
pipistrellus pipistrellus	Evolution and Antiviral Specificities of Interferon-Induced Mx Proteins of Bats against Ebola, Influenza, and Other RNA Viruses	N
pongo pygmaeus	Serological Evidence of Ebola Virus Infection in Indonesian Orangutans	N
pteropus alecto	A Potent Postentry Restriction to Primate Lentiviruses in a Yinpterochiropteran Bat	N
pteropus alecto	Accelerated viral dynamics in bat cell lines, with implications for zoonotic emergence	N
pteropus alecto	Conditions affecting the timing and magnitude of Hendra virus shedding across pteropodid bat populations in Australia	N
pteropus alecto	Unlocking bat immunology: establishment of Pteropus alecto bone marrow-derived dendritic cells and macrophages	N
pteropus alecto	Temporal Variation in Physiological Biomarkers in Black Flying-Foxes (Pteropus alecto), Australia	N
pteropus alecto	Characterization of the Antigen Processing Machinery and Endogenous Peptide Presentation of a Bat MHC Class I Molecule	N
pteropus alecto	Bats and bat-borne diseases: a perspective on Australian megabats	N
pteropus scapulatus	Transmission or Within-Host Dynamics Driving Pulses of Zoonotic Viruses in Reservoir-Host Populations	N
pteropus vampyrus	Biannual birth pulses allow filoviruses to persist in bat populations	N
rattus norvegicus	Free-living animals as a source of zoonotic microorganisms	N
rhinolophus monoceros	Genetically Diverse Filoviruses in Rousettus and Eonycteris spp. Bats, China, 2009 and 2015	N
rhinolophus rouxii	Ebola, KFD and Bats	N
rousettus aegyptiacus	Bats as putative Zaire ebolavirus reservoir hosts and their habitat suitability in Africa	N
rousettus aegyptiacus	Utility of primary cells to examine NPC1 receptor expression in Mops condylurus, a potential Ebola virus reservoir	N
rousettus aegyptiacus	Accelerated viral dynamics in bat cell lines, with implications for zoonotic emergence	N
rousettus aegyptiacus	Human activities link fruit bat presence to Ebola virus disease outbreaks	N
rousettus aegyptiacus	Comparative analysis of serologic cross-reactivity using convalescent sera from filovirus-experimentally infected fruit bats	N
rousettus aegyptiacus	Antibody-Mediated Virus Neutralization Is Not a Universal Mechanism of Marburg, Ebola, or Sosuga Virus Clearance in Egyptian Rousette Bats	N
rousettus aegyptiacus	Tetherin Inhibits Nipah Virus but Not Ebola Virus Replication in Fruit Bat Cells	N
rousettus aegyptiacus	Survey of Ebola Viruses in Frugivorous and Insectivorous Bats in Guinea, Cameroon, and the Democratic Republic of the Congo, 2015-2017	Y	potential maintenance
rousettus aegyptiacus	Innate Immune Responses of Bat and Human Cells to Filoviruses: Commonalities and Distinctions	N
rousettus aegyptiacus	Evolution and Antiviral Specificities of Interferon-Induced Mx Proteins of Bats against Ebola, Influenza, and Other RNA Viruses	N
rousettus aegyptiacus	Ecology of Filoviruses	N
rousettus aegyptiacus	Assessment of listing and categorisation of animal diseases within the framework of the Animal Health Law (Regulation (EU) No 2016/429): Ebola virus disease	N
rousettus aegyptiacus	Filoviruses and bats	N
rousettus aegyptiacus	Ebola Virus Field Sample Collection	N
rousettus aegyptiacus	Transmission or Within-Host Dynamics Driving Pulses of Zoonotic Viruses in Reservoir-Host Populations	N
rousettus aegyptiacus	Comparative phylogeography of African fruit bats (Chiroptera, Pteropodidae) provide new insights into the outbreak of Ebola virus disease in West Africa, 2014-2016	N
rousettus aegyptiacus	Broad and Temperature Independent Replication Potential of Filoviruses on Cells Derived From Old and New World Bat Species	N
rousettus aegyptiacus	Assessing the Evidence Supporting Fruit Bats as the Primary Reservoirs for Ebola Viruses	N
rousettus aegyptiacus	BATS: CARRIERS OF ZOONOTIC VIRAL AND EMERGING INFECTIOUS DISEASES	N
rousettus aegyptiacus	Ebola, Bats and Evidence-Based Policy Informing Ebola Policy	N
rousettus aegyptiacus	Experimental Inoculation of Egyptian Fruit Bats (Rousettus aegyptiacus) with Ebola Virus	N
rousettus aegyptiacus	Biannual birth pulses allow filoviruses to persist in bat populations	N
rousettus aegyptiacus	Experimental Inoculation of Egyptian Rousette Bats (Rousettus aegyptiacus) with Viruses of the Ebolavirus and Marburgvirus Genera	N
rousettus aegyptiacus	Marburg Virus Infection Detected in a Common African Bat	N
rousettus aegyptiacus	Bats and other reservoir hosts of Filoviridae. Danger of epidemic on the African continent? - A deductive literature analysis	N
rousettus aegyptiacus	Bat Cells (Rousettus aegyptiacus) as a Model System for the Investigation of Filoviral Infection	N
rousettus aegyptiacus	Large serological survey showing cocirculation of Ebola and Marburg viruses in Gabonese bat populations, and a high seroprevalence of both viruses in Rousettus aegyptiacus	Y	potential maintenance
rousettus leschenaultii	Filovirus-reactive antibodies in humans and bats in Northeast India imply zoonotic spillover	Y	none
sturnira lilium	Evolution and Antiviral Specificities of Interferon-Induced Mx Proteins of Bats against Ebola, Influenza, and Other RNA Viruses	N
sus scrofa	Viruses from poultry and livestock pose continuous threats to human beings	N
sus scrofa	Investigation of Ebolavirus exposure in pigs presented for slaughter in Uganda	Y	none
sus scrofa	Serological evidence of exposure to ebolaviruses in domestic pigs from Guinea	Y	none
sus scrofa	Assessment of listing and categorisation of animal diseases within the framework of the Animal Health Law (Regulation (EU) No 2016/429): Ebola virus disease	N
sus scrofa	Insights into Reston virus spillovers and adaption from virus whole genome sequences	N
sus scrofa	Assessing the Potential Role of Pigs in the Epidemiology of Ebola Virus in Uganda	Y	none
sus scrofa	Discovery of Swine as a Host for the Reston ebolavirus	Y	none
sus scrofa	The Emergence of Ebola virus in humans: a long process not yet fully understood	N
sus scrofa	Bats as reservoirs of severe emerging infectious diseases	N
sus scrofa	Dead or alive: animal sampling during Ebola hemorrhagic fever outbreaks in humans	Y	none
sus scrofa	Transmission of Ebola virus from pigs to non-human primates	N
vespertilio murinus	Virus Diversity, Abundance, and Evolution in Three Different Bat Colonies in Switzerland	N
chlorocebus aethiops	Serological Evidence of Filovirus Infection in Nonhuman Primates in Zambia	Y	none
chlorocebus aethiops	Virological and Serological Findings in Rousettus aegyptiacus Experimentally Inoculated with Vero Cells-Adapted Hogan Strain of Marburg Virus	N
chlorocebus aethiops	Establishment of Fruit Bat Cells (Rousettus aegyptiacus) as a Model System for the Investigation of Filoviral Infection	N
chlorocebus aethiops	Disease modeling for Ebola and Marburg viruses	N
chlorocebus aethiops	Focus on research: Marburg hemorrhagic fever - The forgotten cousin strikes	N
chlorocebus aethiops	ANTIBODIES TO HEMORRHAGIC-FEVER VIRUSES AND TO SELECTED ARBOVIRUSES IN MONKEYS FROM THE CENTRAL-AFRICAN-REPUBLIC	Y	none
chlorocebus aethiops	Ebola virus and hemorrhagic fever: Andromeda strain or localized pathogen?	N
chlorocebus aethiops	Antibodies in primates to the Marburg virus.	N
chlorocebus aethiops	An infectious disease transmitted by Cercopithecus aethiops. (\"Green monkey disease\")	N
epomops franqueti	Comparative phylogeography of African fruit bats (Chiroptera, Pteropodidae) provide new insights into the outbreak of Ebola virus disease in West Africa, 2014-2016	N
epomops franqueti	Assessing the Evidence Supporting Fruit Bats as the Primary Reservoirs for Ebola Viruses	N
epomops franqueti	Bats and other reservoir hosts of Filoviridae. Danger of epidemic on the African continent? - A deductive literature analysis	N
epomops franqueti	Large serological survey showing cocirculation of Ebola and Marburg viruses in Gabonese bat populations, and a high seroprevalence of both viruses in Rousettus aegyptiacus	Y	none
hypsignathus monstrosus	Comparative phylogeography of African fruit bats (Chiroptera, Pteropodidae) provide new insights into the outbreak of Ebola virus disease in West Africa, 2014-2016	N
hypsignathus monstrosus	Broad and Temperature Independent Replication Potential of Filoviruses on Cells Derived From Old and New World Bat Species	N
hypsignathus monstrosus	Assessing the Evidence Supporting Fruit Bats as the Primary Reservoirs for Ebola Viruses	N
hypsignathus monstrosus	Bats and other reservoir hosts of Filoviridae. Danger of epidemic on the African continent? - A deductive literature analysis	N
hypsignathus monstrosus	Large serological survey showing cocirculation of Ebola and Marburg viruses in Gabonese bat populations, and a high seroprevalence of both viruses in Rousettus aegyptiacus	Y	none
micropteropus pusillus	Comparative phylogeography of African fruit bats (Chiroptera, Pteropodidae) provide new insights into the outbreak of Ebola virus disease in West Africa, 2014-2016	N
micropteropus pusillus	Assessing the Evidence Supporting Fruit Bats as the Primary Reservoirs for Ebola Viruses	N
micropteropus pusillus	Large serological survey showing cocirculation of Ebola and Marburg viruses in Gabonese bat populations, and a high seroprevalence of both viruses in Rousettus aegyptiacus	Y	none
miniopterus inflatus	Marburg Virus in Fruit Bat, Kenya	N
miniopterus inflatus	Studies of reservoir hosts for Marburg virus	Y	none
pongo pygmaeus	Serological Evidence of Ebola Virus Infection in Indonesian Orangutans	Y	none
rhinolophus eloquens	Studies of reservoir hosts for Marburg virus	Y	potential maintenance
apodemus chevrieri	Detection of alpha- and betacoronaviruses in rodents from Yunnan, China	Y	none
arctonyx collaris	Coronaviruses in wild animals sampled in and around Wuhan at the beginning of COVID-19 emergence	Y	none
aselliscus stoliczkanus	Variation in synonymous nucleotide composition among genomes of sarbecoviruses and consequences for the origin of COVID-19	N
aselliscus stoliczkanus	Genomic Characterization of Diverse Bat Coronavirus HKU10 in Hipposideros Bats	Y	none
bison bonasus	Detection and characterization of bovine-like coronaviruses from four species of zoo ruminants	N
bos taurus	Investigations on SARS-CoV-2 Susceptibility of Domestic and Wild Animals Using Primary Cell Culture Models Derived from the Upper and Lower Respiratory Tract	N
bos taurus	One Health and Cattle Genetic Resources: Mining More than 500 Cattle Genomes to Identify Variants in Candidate Genes Potentially Affecting Coronavirus Infections	N
camelus bactrianus	Serological exposure in Bactrian and dromedary camels in Kazakhstan to a MERS or MERS-like coronavirus	Y	none
camelus bactrianus	Establishment of well-differentiated camelid airway cultures to study Middle East respiratory syndrome coronavirus	N
camelus bactrianus	Middle East respiratory syndrome coronavirus infection in camelids	N
camelus bactrianus	Investigations on SARS-CoV-2 Susceptibility of Domestic and Wild Animals Using Primary Cell Culture Models Derived from the Upper and Lower Respiratory Tract	N
camelus bactrianus	Middle East Respiratory Syndrome-Coronavirus Seropositive Bactrian Camels, Mongolia	Y	none
camelus bactrianus	Middle East Respiratory Syndrome Coronavirus Antibodies in Bactrian and Hybrid Camels from Dubai	Y	none
camelus bactrianus	Bactrian camels shed large quantities of Middle East respiratory syndrome coronavirus (MERS-CoV) after experimental infection	Y	none
camelus bactrianus	First isolation of West Nile virus from a dromedary camel	N
camelus bactrianus	Absence of Middle East Respiratory Syndrome Coronavirus in Camelids, Kazakhstan, 2015	Y	none
camelus bactrianus	Zoonotic origins of human coronavirus 2019 (HCoV-19/SARS-CoV-2): why is this work important?	N
camelus dromedarius	The Middle East respiratory syndrome coronavirus in the breath of some infected dromedary camels (Camelus dromedarius)	Y	none
camelus dromedarius	Qatar experience on One Health approach for middle-east respiratory syndrome coronavirus, 2012-2017: A viewpoint	N
camelus dromedarius	A rapid scoping review of Middle East respiratory syndrome coronavirus in animal hosts	N
camelus dromedarius	Efficacy of an Adjuvanted Middle East Respiratory Syndrome Coronavirus Spike Protein Vaccine in Dromedary Camels and Alpacas	N
camelus dromedarius	Mapping Potential Amplification and Transmission Hotspots for MERS-CoV, Kenya	N
camelus dromedarius	Reported Direct and Indirect Contact with Dromedary Camels among Laboratory-Confirmed MERS-CoV Cases	N
camelus dromedarius	Bartonella dromedarii sp. nov. Isolated from Domesticated Camels (Camelus dromedarius) in Israel	N
camelus dromedarius	The sample of choice for detecting Middle East respiratory syndrome coronavirus in asymptomatic dromedary camels using real-time reverse-transcription polymerase chain reaction	y	none
camelus dromedarius	MERS and the dromedary camel trade between Africa and the Middle East	N
camelus dromedarius	MERS-CoV Infection of Alpaca in a Region Where MERS-CoV is Endemic	Y	none
camelus dromedarius	Replication and Shedding of MERS-CoV in Upper Respiratory Tract of Inoculated Dromedary Camels	N
camelus dromedarius	Middle East respiratory syndrome (MERS): bats or dromedary, which of them is responsible?, Le 'syndrome respiratoire du Moyen-Orient' (MERS) : qui est responsable, les chauves-souris ou le dromadaire ?	N
camelus dromedarius	Antibodies against MERS Coronavirus in Dromedaries, United Arab Emirates, 2003 and 2013	Y	A3
canis lupus	Transmission of SARS-CoV-2 from humans to animals and potential host adaptation	N
canis lupus	Investigations on SARS-CoV-2 Susceptibility of Domestic and Wild Animals Using Primary Cell Culture Models Derived from the Upper and Lower Respiratory Tract	N
capra hircus	Development of an in vitro model for animal species susceptibility to SARS-CoV-2 replication based on expression of ACE2 and TMPRSS2 in avian cells	N
cervus elaphus	Serological screening in wild ruminants in Germany, 2021/2022: No evidence of SARS-CoV-2, bluetongue virus or pestivirus spread but high seroprevalences against Schmallenberg virus	Y	none
chaerephon pumilus	Coronavirus and Paramyxovirus Shedding by Bats in a Cave and Buildings in Ethiopia	Y	none
chaerephon pumilus	Metagenomic Analysis Reveals Previously Undescribed Bat Coronavirus Strains in Eswatini	Y	none
chaerephon pumilus	Identification of Coronaviruses, Paramyxoviruses, Reoviruses, and Rotaviruses among Bats in Nigeria	Y	none
chlorocebus aethiops	Development of an in vitro model for animal species susceptibility to SARS-CoV-2 replication based on expression of ACE2 and TMPRSS2 in avian cells	N
chlorocebus aethiops	Independent infections of porcine deltacoronavirus among Haitian children	N
chlorocebus aethiops	Enhanced replication fitness of MERS-CoV clade B over clade A strains in camelids explains the dominance of clade B strains in the Arabian Peninsula	N
chlorocebus aethiops	Susceptibility of livestock to SARS-CoV-2 infection	N
chlorocebus aethiops	SARS-CoV-2 evolution in animals suggests mechanisms for rapid variant selection	N
chlorocebus aethiops	Type I and III IFNs produced by the nasal epithelia and dimmed inflammation are features of alpacas resolving MERS-CoV infection	N
chlorocebus aethiops	A pneumonia outbreak associated with a new coronavirus of probable bat origin (vol 579, pg 270, 2020)	N
chlorocebus aethiops	Development of a Fluorescence-Based, High-Throughput SARS-CoV-2 3CL(p)(ro) Reporter Assay	N
chlorocebus aethiops	Isolation of SARS-CoV-2-related coronavirus from Malayan pangolins	N
chlorocebus aethiops	Using the spike protein feature to predict infection risk and monitor the evolutionary dynamic of coronavirus	N
chlorocebus aethiops	Trypsin Treatment Unlocks Barrier for Zoonotic Bat Coronavirus Infection	N
chlorocebus aethiops	Livestock Susceptibility to Infection with Middle East Respiratory Syndrome Coronavirus	N
chlorocebus aethiops	Immunogenicity of Candidate MERS-CoV DNA Vaccines Based on the Spike Protein	N
chlorocebus aethiops	Link of a ubiquitous human coronavirus to dromedary camels	N
chlorocebus aethiops	First isolation of West Nile virus from a dromedary camel	N
chlorocebus aethiops	Replication and shedding of MERS-CoV in Jamaican fruit bats (Artibeus jamaicensis)	N
chlorocebus aethiops	Serologic Assessment of Possibility for MERS-CoV Infection in Equids	N
chlorocebus aethiops	CD26/DPP4 Cell-Surface Expression in Bat Cells Correlates with Bat Cell Susceptibility to Middle East Respiratory Syndrome Coronavirus (MERS-CoV) Infection and Evolution of Persistent Infection	N
chlorocebus aethiops	Pathways of cross-species transmission of synthetically reconstructed zoonotic severe acute respiratory syndrome coronavirus	N
chlorocebus aethiops	Severe acute respiratory syndrome coronavirus persistence in Vero cells	N
chlorocebus sabaeus	ACE2 receptor usage reveals variation in susceptibility to SARS-CoV and SARS-CoV-2 infection among bat species	N
cynopterus brachyotis	Molecular detection of bat coronaviruses in three bat species in Indonesia	Y	A3
cynopterus brachyotis	First Molecular Evidence for Bat Betacoronavirus in Mindanao.	Y	none
cynopterus brachyotis	Detection and characterization of a novel bat-borne coronavirus in Singapore using multiple molecular approaches	Y	none
cynopterus brachyotis	Identification of a Lineage D Betacoronavirus in Cave Nectar Bats (Eonycteris spelaea) in Singapore and an Overview of Lineage D Reservoir Ecology in SE Asian Bats	Y	none
cynopterus sphinx	Presence of Recombinant Bat Coronavirus GCCDC1 in Cambodian Bats	Y	none
cynopterus sphinx	Identification of Diverse Bat Alphacoronaviruses and Betacoronaviruses in China Provides New Insights Into the Evolution and Origin of Coronavirus-Related Diseases	Y	none
cynopterus sphinx	Diversity of coronavirus in bats from Eastern Thailand	Y	none
cynopterus sphinx	Serological Evidence of Toxoplasma gondii Infection in Five Species of Bats in China	N
dobsonia moluccensis	Detection of coronavirus genomes in Moluccan naked-backed fruit bats in Indonesia	Y	none
eidolon dupreanum	Full Genome Nobecovirus Sequences From Malagasy Fruit Bats Define a Unique Evolutionary History for This Coronavirus Clade	Y	A2, A3
eidolon dupreanum	Detection of new genetic variants of Betacoronaviruses in Endemic Frugivorous Bats of Madagascar	Y	none
eidolon helvum	Identification of Coronaviruses, Paramyxoviruses, Reoviruses, and Rotaviruses among Bats in Nigeria	Y	none
eidolon helvum	Cameroonian fruit bats harbor divergent viruses, including rotavirus H, bastroviruses, and picobirnaviruses using an alternative genetic code	N
eidolon helvum	Detection of Novel SARS-like and Other Coronaviruses in Bats from Kenya	Y	none
eidolon helvum	Coronavirus antibodies in African bat species	Y	none
eonycteris spelaea	Eonycteris spelaea) Breeding Colony in Singapore.	N
eonycteris spelaea	Longitudinal monitoring in Cambodia suggests higher circulation of alpha and betacoronaviruses in juvenile and immature bats of three species	Y	none
eonycteris spelaea	Presence of Recombinant Bat Coronavirus GCCDC1 in Cambodian Bats	Y	none
eonycteris spelaea	Detection of Recombinant Rousettus Bat Coronavirus GCCDC1 in Lesser Dawn Bats (Eonycteris spelaea) in Singapore	Y	none
eonycteris spelaea	Identification of a Lineage D Betacoronavirus in Cave Nectar Bats (Eonycteris spelaea) in Singapore and an Overview of Lineage D Reservoir Ecology in SE Asian Bats	Y	A3
epomophorus gambianus	Identification of Coronaviruses, Paramyxoviruses, Reoviruses, and Rotaviruses among Bats in Nigeria	Y	none
epomophorus gambianus	Cameroonian fruit bats harbor divergent viruses, including rotavirus H, bastroviruses, and picobirnaviruses using an alternative genetic code	Y	none
epomophorus gambianus	Tissue Distribution of the MERS-Coronavirus Receptor in Bats	N
epomophorus gambianus	Coronavirus antibodies in African bat species	Y	none
epomops franqueti	Coronavirus antibodies in African bat species	Y	none
eptesicus serotinus	Novel coronaviruses, astroviruses, adenoviruses and circoviruses in insectivorous bats from northern China	Y	none
eptesicus serotinus	Tissue Distribution of the MERS-Coronavirus Receptor in Bats	N
eptesicus serotinus	Alpha and lineage C betaCoV infections in Italian bats	Y	none
equus caballus	Development of an in vitro model for animal species susceptibility to SARS-CoV-2 replication based on expression of ACE2 and TMPRSS2 in avian cells	N
erinaceus amurensis	MERS-related CoVs in hedgehogs from Hubei Province, China	Y	A2
erinaceus amurensis	Eco-Virological Preliminary Study of Potentially Emerging Pathogens in Hedgehogs (Erinaceus europaeus) Recovered at a Wildlife Treatment and Rehabilitation Center in Northern Italy	N
erinaceus amurensis	Identification of a Novel Betacoronavirus (Merbecovirus) in Amur Hedgehogs from China	Y	none
erinaceus europaeus	First detection of Hedgehog coronavirus 1 in Poland	Y	none
erinaceus europaeus	Eco-Virological Preliminary Study of Potentially Emerging Pathogens in Hedgehogs (Erinaceus europaeus) Recovered at a Wildlife Treatment and Rehabilitation Center in Northern Italy	Y	A3
erinaceus europaeus	Can Coronaviruses Steal Genes from the Host as Evidenced in Western European Hedgehogs by EriCoV Genetic Characterization?	Y	none
erinaceus europaeus	Cross-species transmission of the newly identified coronavirus 2019-nCoV	N
erinaceus europaeus	Extension of the known distribution of a novel clade C betacoronavirus in a wildlife host	Y	A2
erinaceus roumanicus	First detection of Hedgehog coronavirus 1 in Poland	N
erinaceus roumanicus	Eco-Virological Preliminary Study of Potentially Emerging Pathogens in Hedgehogs (Erinaceus europaeus) Recovered at a Wildlife Treatment and Rehabilitation Center in Northern Italy	N
felis catus	Transmission of SARS-CoV-2 from humans to animals and potential host adaptation	N
felis catus	Development of an in vitro model for animal species susceptibility to SARS-CoV-2 replication based on expression of ACE2 and TMPRSS2 in avian cells	N
hemitragus jemlahicus	Detection and characterization of bovine-like coronaviruses from four species of zoo ruminants	N
hipposideros armiger	Development of an in vitro model for animal species susceptibility to SARS-CoV-2 replication based on expression of ACE2 and TMPRSS2 in avian cells	N
hipposideros armiger	Longitudinal monitoring in Cambodia suggests higher circulation of alpha and betacoronaviruses in juvenile and immature bats of three species	Y	none
hipposideros armiger	Molecular evolution and phylogenetic analysis of SARS-CoV-2 and hosts ACE2 protein suggest Malayan pangolin as intermediary host	N
hipposideros armiger	Entry of Scotophilus Bat Coronavirus-512 and Severe Acute Respiratory Syndrome Coronavirus in Human and Multiple Animal Cells	N
hipposideros caffer	Coronavirus antibodies in African bat species	Y	none
hipposideros larvatus	Longitudinal monitoring in Cambodia suggests higher circulation of alpha and betacoronaviruses in juvenile and immature bats of three species	Y	A3
hipposideros larvatus	Genomic Characterization of Diverse Bat Coronavirus HKU10 in Hipposideros Bats	N	A1, A2
hipposideros lekaguli	Diversity of coronavirus in bats from Eastern Thailand	Y	none
hipposideros pomona	Genomic Characterization of Diverse Bat Coronavirus HKU10 in Hipposideros Bats	N	A2, A3
hipposideros pomona	Coexistence of multiple coronaviruses in several bat colonies in an abandoned mineshaft	Y	none
hipposideros ruber	Detection of Alpha- and Betacoronaviruses in Frugivorous and Insectivorous Bats in Nigeria	Y	none
hipposideros ruber	Identification of Coronaviruses, Paramyxoviruses, Reoviruses, and Rotaviruses among Bats in Nigeria	Y	A2, A3
hippotragus niger	Bovine-Like Coronaviruses Isolated from Four Species of Captive Wild Ruminants Are Homologous to Bovine Coronaviruses, Based on Complete Genomic Sequences	N
hypsugo savii	Detection of Coronaviruses in Bats of Various Species in Italy	Y	none
hystrix brachyura	Coronavirus testing indicates transmission risk increases along wildlife supply chains for human consumption in Viet Nam, 2013-2014	Y	none
ia io	Genetic diversity of bat coronaviruses and comparative genetic analysis of MERS-related coronaviruses in South Korea	NO ACCESS
ia io	Discovery of Novel Bat Coronaviruses in South China That Use the Same Receptor as Middle East Respiratory Syndrome Coronavirus	Y	A2
kobus ellipsiprymnus	Bovine-Like Coronaviruses Isolated from Four Species of Captive Wild Ruminants Are Homologous to Bovine Coronaviruses, Based on Complete Genomic Sequences	N
macaca mulatta	COVID-19: animals, veterinary and zoonotic links	N
macaca mulatta	Host Species Restriction of Middle East Respiratory Syndrome Coronavirus through Its Receptor, Dipeptidyl Peptidase 4	N
macroglossus minimus	Molecular detection of bat coronaviruses in three bat species in Indonesia	Y	none
macroglossus minimus	First Molecular Evidence for Bat Betacoronavirus in Mindanao.	Y	none
macroglossus minimus	Identification of a Lineage D Betacoronavirus in Cave Nectar Bats (Eonycteris spelaea) in Singapore and an Overview of Lineage D Reservoir Ecology in SE Asian Bats	Y	none
manis javanica	Variation in synonymous nucleotide composition among genomes of sarbecoviruses and consequences for the origin of COVID-19	N
manis javanica	Shifts in global bat diversity suggest a possible role of climate change in the emergence of SARS-CoV-1 and SARS-CoV-2	N
manis javanica	How related is SARS-CoV-2 to other coronaviruses?	N
manis javanica	Molecular evolution and phylogenetic analysis of SARS-CoV-2 and hosts ACE2 protein suggest Malayan pangolin as intermediary host	N
manis javanica	Viral, host and environmental factors that favor anthropozoonotic spillover of coronaviruses: An opinionated review, focusing on SARS-CoV, MERS-CoV and SARS-CoV-2	N
manis javanica	A Genomic Perspective on the Origin and Emergence of SARS-CoV-2	N
manis javanica	Zoonotic origins of human coronavirus 2019 (HCoV-19/SARS-CoV-2): why is this work important?	N
manis javanica	Isolation of SARS-CoV-2-related coronavirus from Malayan pangolins	Y	none
manis javanica	In silico studies on the comparative characterization of the interactions of SARS-CoV-2 spike glycoprotein with ACE-2 receptor homologs and human TLRs	N
manis javanica	Identifying SARS-CoV-2-related coronaviruses in Malayan pangolins	Y	A2
manis javanica	Cross-species transmission of the newly identified coronavirus 2019-nCoV	N
megaerops niphanae	Genetic diversity of coronaviruses in bats in Lao PDR and Cambodia	Y	none
mesocricetus auratus	Transmission of SARS-CoV-2 from humans to animals and potential host adaptation	N
mesocricetus auratus	Development of an in vitro model for animal species susceptibility to SARS-CoV-2 replication based on expression of ACE2 and TMPRSS2 in avian cells	N
miniopterus schreibersii	Long-term surveillance of bat coronaviruses in Korea: Diversity and distribution pattern	Y	none
miniopterus schreibersii	Coexistence of multiple coronaviruses in several bat colonies in an abandoned mineshaft	Y	none
mops condylurus	Metagenomic Analysis Reveals Previously Undescribed Bat Coronavirus Strains in Eswatini	N
mops condylurus	Identification of Coronaviruses, Paramyxoviruses, Reoviruses, and Rotaviruses among Bats in Nigeria	Y	none
mus musculus	First Coronavirus Active Survey in Rodents From the Canary Islands	Y	A2
mus musculus	Peridomestic Mammal Susceptibility to Severe Acute Respiratory Syndrome Coronavirus 2 Infection	N
mus musculus	Molecular evolution and phylogenetic analysis of SARS-CoV-2 and hosts ACE2 protein suggest Malayan pangolin as intermediary host	N
mus musculus	Predicting the angiotensin converting enzyme 2 (ACE2) utilizing as the of SARS-CoV-2	N
mustela lutreola	No Evidence of SARS-CoV-2 Infection in Wild Mink (Mustela lutreola and Neogale vison) from Northern Spain during the First Two Years of Pandemic	N
mustela putorius	Investigations on SARS-CoV-2 Susceptibility of Domestic and Wild Animals Using Primary Cell Culture Models Derived from the Upper and Lower Respiratory Tract	N
myodes glareolus	Discovery of a Novel Coronavirus in Swedish Bank Voles (Myodes glareolus)	Y	A3
myodes glareolus	Experimental SARS-CoV-2 Infection of Bank Voles	N
myonycteris torquata	Coronavirus antibodies in African bat species	Y	none
myotis dasycneme	Utilizing the VirIdAl Pipeline to Search for Viruses in the Metagenomic Data of Bat Samples	N
myotis daubentonii	The Genetic Characterization of the First Detected Bat Coronaviruses in Poland Revealed SARS-Related Types and Alphacoronaviruses	Y	none
myotis daubentonii	Alphacoronavirus in a Daubenton's Myotis Bat (Myotis daubentonii) in Sweden	N
myotis daubentonii	Utilizing the VirIdAl Pipeline to Search for Viruses in the Metagenomic Data of Bat Samples	N
myotis daubentonii	Long-term surveillance of bat coronaviruses in Korea: Diversity and distribution pattern	N
myotis daubentonii	Angiotensin-converting enzyme 2 (ACE2) proteins of different bat species confer variable susceptibility to SARS-CoV entry	N
myotis emarginatus	A Cross Sectional Sampling Reveals Novel Coronaviruses in Bat Populations of Georgia	N
myotis emarginatus	Novel Alphacoronaviruses and Paramyxoviruses Cocirculate with Type 1 and Severe Acute Respiratory System (SARS)-Related Betacoronaviruses in Synanthropic Bats of Luxembourg	Y	none
myotis formosus	Detection of the Severe Acute Respiratory Syndrome-Related Coronavirus and Alphacoronavirus in the Bat Population of Taiwan	Y	none
myotis horsfieldii	Genetic diversity of coronaviruses in bats in Lao PDR and Cambodia	Y	none
myotis ricketti	Novel coronaviruses, astroviruses, adenoviruses and circoviruses in insectivorous bats from northern China	Y	none
neovison vison	Systematic Tracing of Susceptible Animals to SARS-CoV-2 by a Bioinformatics Framework	N
neovison vison	SARS-CoV-2 infection in cats and dogs in infected mink farms	N
neovison vison	Transmission dynamics and susceptibility patterns of SARS-CoV-2 in domestic, farmed and wild animals: Sustainable One Health surveillance for conservation and public health to prevent future epidemics and pandemics	N
neovison vison	Manifestation of SARS-CoV-2 Infections in Mink Related to Host-, Virus- and Farm-Associated Factors, The Netherlands 2020
neovison vison	No Evidence of SARS-CoV-2 Infection in Wild Mink (Mustela lutreola and Neogale vison) from Northern Spain during the First Two Years of Pandemic
neovison vison	SARS-CoV-2 Outbreak on a Spanish Mink Farm: Epidemiological, Molecular, and Pathological Studies
neovison vison	Transmission of SARS-CoV-2 from humans to animals and potential host adaptation
neovison vison	Analysis of SARS-CoV-2 Variants From 24,181 Patients Exemplifies the Role of Globalization and Zoonosis in Pandemics
neovison vison	Receptor-binding domain-based immunoassays for serosurveillance differentiate efficiently between SARS-CoV2-exposed and non-exposed farmed mink
neovison vison	Mathematical modelling of SARS-CoV-2 variant outbreaks reveals their probability of extinction
neovison vison	Spatial epidemiology and genetic diversity of SARS-CoV-2 and related coronaviruses in domestic and wild animals
neovison vison	Animal Transmission of SARS-CoV-2 and the Welfare of Animals during the COVID-19 Pandemic
neovison vison	SARS-CoV-2 pandemic and its threats to humans and animals
neovison vison	An outbreak of SARS-CoV-2 with high mortality in mink (Neovison vison) on multiple Utah farms
neovison vison	Mutation Y453F in the spike protein of SARS-CoV-2 enhances interaction with the mink ACE2 receptor for host adaption
neovison vison	Animal reservoirs of SARS-CoV-2: calculable COVID-19 risk for older adults from animal to human transmission
neovison vison	Evolution, Ecology, and Zoonotic Transmission of Betacoronaviruses: A Review
neovison vison	An Opportunistic Survey Reveals an Unexpected Coronavirus Diversity Hotspot in North America
neovison vison	Review: SARS-CoV-2 infection in farmed minks - an overview of current knowledge on occurrence, disease and epidemiology
neovison vison	First Description of SARS-CoV-2 Infection in Two Feral American Mink (Neovison vison) Caught in the Wild
neovison vison	SARS-CoV-2 (COVID-19): Zoonotic Origin and Susceptibility of Domestic and Wild Animals
neovison vison	Multi-species ELISA for the detection of antibodies against SARS-CoV-2 in animals
neovison vison	Evaluation of a real-time RT-PCR panel for detection of SARS-CoV-2 in bat guano
neovison vison	Interacting Proteins, Polymorphisms and the Susceptibility of Animals to SARS-CoV-2
nyctalus leisleri	Genomic Characterization of Severe Acute Respiratory Syndrome-Related Coronavirus in European Bats and Classification of Coronaviruses Based on Partial RNA-Dependent RNA Polymerase Gene Sequences	N
nyctalus noctula	Utilizing the VirIdAl Pipeline to Search for Viruses in the Metagenomic Data of Bat Samples	N
nyctalus noctula	Detection of Coronaviruses in Bats of Various Species in Italy	Y	none
nyctereutes procyonoides	Susceptibility of Raccoon Dogs for Experimental SARS-CoV-2 Infection	N
nyctereutes procyonoides	Viral, host and environmental factors that favor anthropozoonotic spillover of coronaviruses: An opinionated review, focusing on SARS-CoV, MERS-CoV and SARS-CoV-2	N
nyctereutes procyonoides	Molecular evolution analysis and geographic investigation of severe acute respiratory syndrome coronavirus-like virus in palm civets at an animal market and on farms	N
nycteris thebaica	Coronavirus antibodies in African bat species	Y	none
nyctinomops laticaudatus	Coronaviruses in bats from Mexico	Y	none
odocoileus virginianus	High Seroprevalence of SARS-CoV-2 in White-Tailed Deer (Odocoileus virginianus) at One of Three Captive Cervid Facilities in Texas
odocoileus virginianus	Transmission of SARS-CoV-2 from humans to animals and potential host adaptation
odocoileus virginianus	From Deer-to-Deer: SARS-CoV-2 is efficiently transmitted and presents broad tissue tropism and replication sites in white-tailed deer
odocoileus virginianus	SARS-CoV-2 infection in free-ranging white-tailed deer
odocoileus virginianus	Infection and transmission of ancestral SARS-CoV-2 and its alpha variant in pregnant white-tailed deer
odocoileus virginianus	Bovine-Like Coronaviruses Isolated from Four Species of Captive Wild Ruminants Are Homologous to Bovine Coronaviruses, Based on Complete Genomic Sequences
odocoileus virginianus	Screening of wild deer populations for exposure to SARS-CoV-2 in the United Kingdom, 2020-2021
odocoileus virginianus	Transmission history of SARS-CoV-2 in humans and white-tailed deer
oryctolagus cuniculus	Epidemiology and Genomic Characterization of Two Novel SARS-Related Coronaviruses in Horseshoe Bats from Guangdong, China	N
oryctolagus cuniculus	Lack of Middle East Respiratory Syndrome Coronavirus Transmission in Rabbits	N
ovis aries	Investigations on SARS-CoV-2 Susceptibility of Domestic and Wild Animals Using Primary Cell Culture Models Derived from the Upper and Lower Respiratory Tract	N
paguma larvata	Virome characterization of game animals in China reveals a spectrum of emerging pathogens	Y	none
paguma larvata	The SARS-CoV-2 outbreak from a one health perspective	N
paguma larvata	Molecular evolution and phylogenetic analysis of SARS-CoV-2 and hosts ACE2 protein suggest Malayan pangolin as intermediary host	N
paguma larvata	Viral, host and environmental factors that favor anthropozoonotic spillover of coronaviruses: An opinionated review, focusing on SARS-CoV, MERS-CoV and SARS-CoV-2	N
paguma larvata	Predicting the angiotensin converting enzyme 2 (ACE2) utilizing as the of SARS-CoV-2	N
paguma larvata	SARS coronavirus without reservoir originated from an unnatural evolution, experienced the reverse evolution, and finally disappeared in the world	NO ACCESS
paguma larvata	Molecular evolution analysis and geographic investigation of severe acute respiratory syndrome coronavirus-like virus in palm civets at an animal market and on farms	Y	none
paguma larvata	Animal coronaviruses: what can they teach us about the severe acute respiratory syndrome?	N
pan troglodytes	Molecular evolution and phylogenetic analysis of SARS-CoV-2 and hosts ACE2 protein suggest Malayan pangolin as intermediary host	N
panthera leo	The threat of the spread of SARS-CoV-2 variants in animals	N
panthera leo	From People to Panthera: Natural SARS-CoV-2 Infection in Tigers and Lions at the Bronx Zoo	N
panthera tigris	From People to Panthera: Natural SARS-CoV-2 Infection in Tigers and Lions at the Bronx Zoo	N
paradoxurus hermaphroditus	LEUCOCYTE COUNT, LEUCOCYTE DIFFERENTIATION, AND STRESS INDEX OF COMMON PALM CIVETS (PARADOXURUS HERMAPHRODITUS)., Profil Leukosit, Diferensial Leukosit, dan Indeks Stres Luwak Jawa (Paradoxurus hermaphroditus)	N
peromyscus leucopus	Epidemiology and Genomic Characterization of Two Novel SARS-Related Coronaviruses in Horseshoe Bats from Guangdong, China	N
peromyscus leucopus	SARS-CoV-2 infection and transmission in the North American deer mouse	N
peromyscus leucopus	Animal reservoirs of SARS-CoV-2: calculable COVID-19 risk for older adults from animal to human transmission	N
peromyscus maniculatus	SARS-CoV-2 infection and transmission in the North American deer mouse	N
peromyscus maniculatus	Peridomestic Mammal Susceptibility to Severe Acute Respiratory Syndrome Coronavirus 2 Infection	N
pipistrellus abramus	Viruses and Bats	N
pipistrellus abramus	Identification of a Novel Betacoronavirus (Merbecovirus) in Amur Hedgehogs from China	N
pipistrellus coromandra	Genetic diversity of coronaviruses in bats in Lao PDR and Cambodia	Y	A2
pipistrellus kuhlii	The SARS-CoV-2 outbreak from a one health perspective	N
pipistrellus kuhlii	Full genome characterization of two novel Alpha-coronavirus species from Italian bats	N
pipistrellus kuhlii	Detection of Coronaviruses in Bats of Various Species in Italy	Y	A2, A3
pipistrellus nathusii	Utilizing the VirIdAl Pipeline to Search for Viruses in the Metagenomic Data of Bat Samples	N
pipistrellus pipistrellus	Full genome characterization of two novel Alpha-coronavirus species from Italian bats	N
pipistrellus pipistrellus	Discovery of Novel Bat Coronaviruses in South China That Use the Same Receptor as Middle East Respiratory Syndrome Coronavirus	Y	A2
pipistrellus pipistrellus	Tissue Distribution of the MERS-Coronavirus Receptor in Bats	N
pipistrellus pipistrellus	Alphacoronaviruses Detected in French Bats Are Phylogeographically Linked to Coronaviruses of European Bats	N
pipistrellus pygmaeus	Characterization of Pipistrellus pygmaeus Bat Virome from Sweden	N
pipistrellus pygmaeus	Alphacoronavirus in a Daubenton's Myotis Bat (Myotis daubentonii) in Sweden	N
ptenochirus jagori	First Molecular Evidence for Bat Betacoronavirus in Mindanao	Y	none
pteronotus davyi	Novel Bat Coronaviruses, Brazil and Mexico	Y	none
pteropus alecto	A Potent Postentry Restriction to Primate Lentiviruses in a Yinpterochiropteran Bat	N
pteropus alecto	Characterization of the Antigen Processing Machinery and Endogenous Peptide Presentation of a Bat MHC Class I Molecule	N
pteropus alecto	Molecular characterization of RIG-I, STAT-1 and IFN-beta in the horseshoe bat	N
pteropus alecto	Bats and bat-borne diseases: a perspective on Australian megabats	N
pteropus lylei	Longitudinal monitoring in Cambodia suggests higher circulation of alpha and betacoronaviruses in juvenile and immature bats of three species	Y	A3
pteropus lylei	Longitudinal study of age-specific pattern of coronavirus infection in Lyle's flying fox (Pteropus lylei) in Thailand	Y	A3, A2
pteropus rufus	Full Genome Nobecovirus Sequences From Malagasy Fruit Bats Define a Unique Evolutionary History for This Coronavirus Clade	Y	A3
pteropus rufus	Detection of new genetic variants of Betacoronaviruses in Endemic Frugivorous Bats of Madagascar	Y	none
pteronotus davyi	SARS-CoV-2 surveillance in Norway rats (Rattus norvegicus) from Antwerp sewer system, Belgium	Y	none
rattus norvegicus	First Coronavirus Active Survey in Rodents From the Canary Islands	Y	none
rattus norvegicus	A Novel Potentially Recombinant Rodent Coronavirus with a Polybasic Cleavage Site in the Spike Protein	Y	none
rattus norvegicus	Detection of alpha- and betacoronaviruses in rodents from Yunnan, China	N
rattus norvegicus	Free-living animals as a source of zoonotic microorganisms	N
rattus norvegicus	Discovery, diversity and evolution of novel coronaviruses sampled from rodents in China	Y	none
rattus rattus	First Coronavirus Active Survey in Rodents From the Canary Islands	Y	none
rhinolophus affinis	Inferring the ecological niche of bat viruses closely related to SARS-CoV-2 using phylogeographic analyses of Rhinolophus species	N
rhinolophus affinis	The SARS-CoV-2 outbreak from a one health perspective	N
rhinolophus affinis	How related is SARS-CoV-2 to other coronaviruses?	N
rhinolophus affinis	The human coronaviruses (HCoVs) and the molecular mechanisms of SARS-CoV-2 infection	N
rhinolophus affinis	A Genomic Perspective on the Origin and Emergence of SARS-CoV-2	N
rhinolophus affinis	Identification of Diverse Bat Alphacoronaviruses and Betacoronaviruses in China Provides New Insights Into the Evolution and Origin of Coronavirus-Related Diseases	N
rhinolophus affinis	Global Epidemiology of Bat Coronaviruses	N
rhinolophus affinis	Coexistence of multiple coronaviruses in several bat colonies in an abandoned mineshaft	Y	none
rhinolophus affinis	Molecular characterization of RIG-I, STAT-1 and IFN-beta in the horseshoe bat	N
rhinolophus affinis	Variation in synonymous nucleotide composition among genomes of sarbecoviruses and consequences for the origin of COVID-19	N
rhinolophus affinis	Epidemiology and Genomic Characterization of Two Novel SARS-Related Coronaviruses in Horseshoe Bats from Guangdong, China	Y	none
rhinolophus affinis	Isolation of a Novel Bat Rhabdovirus with Evidence of Human Exposure in China	N
rhinolophus affinis	Identification of a novel lineage bat SARS-related coronaviruses that use bat ACE2 receptor	Y	none
rhinolophus cornutus	Variation in synonymous nucleotide composition among genomes of sarbecoviruses and consequences for the origin of COVID-19	N
rhinolophus cornutus	Detection and Characterization of Bat Sarbecovirus Phylogenetically Related to SARS-CoV-2, Japan	Y	none
rhinolophus euryale	Genomic determinants of Furin cleavage in diverse European SARS-related bat coronaviruses	Y	none
rhinolophus euryale	A Cross Sectional Sampling Reveals Novel Coronaviruses in Bat Populations of Georgia	Y	none
rhinolophus ferrumequinum	Molecular evolution and phylogenetic analysis of SARS-CoV-2 and hosts ACE2 protein suggest Malayan pangolin as intermediary host	N
rhinolophus ferrumequinum	Molecular epidemiology, evolution and phylogeny of SARS coronavirus	N
rhinolophus ferrumequinum	Complete genome analysis of a SARS-like bat coronavirus identified in the Republic of Korea	Y	none
rhinolophus ferrumequinum	Molecular identification of Betacoronavirus in bats from Sardinia (Italy): first detection and phylogeny	Y	none
rhinolophus ferrumequinum	Novel Alphacoronaviruses and Paramyxoviruses Cocirculate with Type 1 and Severe Acute Respiratory System (SARS)-Related Betacoronaviruses in Synanthropic Bats of Luxembourg	Y	none
rhinolophus ferrumequinum	Novel coronaviruses, astroviruses, adenoviruses and circoviruses in insectivorous bats from northern China	Y	none
rhinolophus ferrumequinum	Severe Acute Respiratory Syndrome (SARS) Coronavirus ORF8 Protein Is Acquired from SARS-Related Coronavirus from Greater Horseshoe Bats through Recombination	Y	none
rhinolophus ferrumequinum	Detection of a virus related to betacoronaviruses in Italian greater horseshoe bats	Y	A2
rhinolophus ferrumequinum	Full-length genome sequences of two SARS-like coronaviruses in horseshoe bats and genetic variation analysis	N
rhinolophus ferrumequinum	Variation in synonymous nucleotide composition among genomes of sarbecoviruses and consequences for the origin of COVID-19	N
rhinolophus ferrumequinum	Genomic determinants of Furin cleavage in diverse European SARS-related bat coronaviruses	Y	none
rhinolophus ferrumequinum	A Cross Sectional Sampling Reveals Novel Coronaviruses in Bat Populations of Georgia	Y	none
rhinolophus ferrumequinum	SARS-like Coronaviruses in Horseshoe Bats (Rhinolophus spp.) in Russia, 2020	Y	A2, A3
rhinolophus ferrumequinum	New putative animal reservoirs of SARS-CoV-2 in Italian fauna: A bioinformatic approach	N
rhinolophus ferrumequinum	Long-term surveillance of bat coronaviruses in Korea: Diversity and distribution pattern	Y	none
rhinolophus hipposideros	The Genetic Characterization of the First Detected Bat Coronaviruses in Poland Revealed SARS-Related Types and Alphacoronaviruses	Y	A2, A3
rhinolophus hipposideros	Genomic determinants of Furin cleavage in diverse European SARS-related bat coronaviruses	Y	none
rhinolophus hipposideros	SARS-like Coronaviruses in Horseshoe Bats (Rhinolophus spp.) in Russia, 2020	Y	none
rhinolophus hipposideros	Detection of Coronaviruses in Bats of Various Species in Italy	Y	none
rhinolophus macrotis	Variation in synonymous nucleotide composition among genomes of sarbecoviruses and consequences for the origin of COVID-19	N
rhinolophus macrotis	Molecular evolution and phylogenetic analysis of SARS-CoV-2 and hosts ACE2 protein suggest Malayan pangolin as intermediary host	N
rhinolophus macrotis	Full-length genome sequences of two SARS-like coronaviruses in horseshoe bats and genetic variation analysis	N
rhinolophus malayanus	Longitudinal monitoring in Cambodia suggests higher circulation of alpha and betacoronaviruses in juvenile and immature bats of three species	Y	none
rhinolophus malayanus	Inferring the ecological niche of bat viruses closely related to SARS-CoV-2 using phylogeographic analyses of Rhinolophus species	N
rhinolophus monoceros	Detection of the Severe Acute Respiratory Syndrome-Related Coronavirus and Alphacoronavirus in the Bat Population of Taiwan	Y	A2, A3
rhinolophus pearsonii	Full-length genome sequences of two SARS-like coronaviruses in horseshoe bats and genetic variation analysis	N
rhinolophus pusillus	Variation in synonymous nucleotide composition among genomes of sarbecoviruses and consequences for the origin of COVID-19	N
rhinolophus pusillus	Novel coronaviruses, astroviruses, adenoviruses and circoviruses in insectivorous bats from northern China	Y	none
rhinolophus sinicus	Isolation and Characterization of a Novel Bat Coronavirus Closely Related to the Direct Progenitor of Severe Acute Respiratory Syndrome Coronavirus	Y	none
rhinolophus sinicus	Coexistence of multiple coronaviruses in several bat colonies in an abandoned mineshaft	Y	none
rhinolophus sinicus	Severe Acute Respiratory Syndrome (SARS) Coronavirus ORF8 Protein Is Acquired from SARS-Related Coronavirus from Greater Horseshoe Bats through Recombination	N
rhinolophus sinicus	Molecular characterization of RIG-I, STAT-1 and IFN-beta in the horseshoe bat	N
rhinolophus sinicus	SARS coronavirus without reservoir originated from an unnatural evolution, experienced the reverse evolution, and finally disappeared in the world	N
rhinolophus sinicus	Close Relative of Human Middle East Respiratory Syndrome Coronavirus in Bat, South Africa	N
rhinolophus sinicus	Angiotensin-converting enzyme 2 (ACE2) proteins of different bat species confer variable susceptibility to SARS-CoV entry	N
rhinolophus sinicus	Evolution of genomes, host shifts and the geographic spread of SARS-CoV and related coronaviruses	N
rhinolophus sinicus	Full-length genome sequences of two SARS-like coronaviruses in horseshoe bats and genetic variation analysis	N
rhinolophus sinicus	Differential Tropism of SARS-CoV and SARS-CoV-2 in Bat Cells	N
rhinolophus sinicus	In silico studies on the comparative characterization of the interactions of SARS-CoV-2 spike glycoprotein with ACE-2 receptor homologs and human TLRs	N
rhinolophus sinicus	Evolutionary Arms Race between Virus and Host Drives Genetic Diversity in Bat Severe Acute Respiratory Syndrome-Related Coronavirus Spike Genes	N
rhinolophus sinicus	Functional assessment of cell entry and receptor usage for SARS-CoV-2 and other lineage B betacoronaviruses	N
rhinolophus sinicus	Cross-species transmission of the newly identified coronavirus 2019-nCoV	N
rhinolophus sinicus	Predicting the angiotensin converting enzyme 2 (ACE2) utilizing as the of SARS-CoV-2	N
rhinolophus sinicus	Molecular epidemiology, evolution and phylogeny of SARS coronavirus	N
rhinolophus sinicus	Novel Bat Alphacoronaviruses in Southern China Support Chinese Horseshoe Bats as an Important Reservoir for Potential Novel Coronaviruses	N
rhinolophus sinicus	Global Epidemiology of Bat Coronaviruses	N
rhinolophus sinicus	Variation in synonymous nucleotide composition among genomes of sarbecoviruses and consequences for the origin of COVID-19	N
rhinolophus sinicus	Systematic Tracing of Susceptible Animals to SARS-CoV-2 by a Bioinformatics Framework	N
rhinolophus sinicus	A Look inside the Replication Dynamics of SARS-CoV-2 in Blyth's Horseshoe Bat (Rhinolophus lepidus) Kidney Cells	N
rhinolophus sinicus	The threat of the spread of SARS-CoV-2 variants in animals	N
rhinolophus sinicus	Epidemiology and Genomic Characterization of Two Novel SARS-Related Coronaviruses in Horseshoe Bats from Guangdong, China	Y	A3, A2
rhinolophus sinicus	Molecular evolution and phylogenetic analysis of SARS-CoV-2 and hosts ACE2 protein suggest Malayan pangolin as intermediary host	N
rhinolophus stheno	Variation in synonymous nucleotide composition among genomes of sarbecoviruses and consequences for the origin of COVID-19	N
rhinolophus thomasi	Isolation of a Novel Bat Rhabdovirus with Evidence of Human Exposure in China	N
rhinopoma hardwickii	Coronavirus and Paramyxovirus Shedding by Bats in a Cave and Buildings in Ethiopia	Y	A2, A3
rousettus aegyptiacus	No evidence of SARS-CoV-2 infection in Rousettus aegyptiacus bat in Egypt	Y	none
rousettus aegyptiacus	Coronaviruses in humans and animals: the role of bats in viral evolution	N
rousettus aegyptiacus	Coronaviruses Detected in Bats in Close Contact with Humans in Rwanda	Y	A2
rousettus aegyptiacus	Tissue Distribution of the MERS-Coronavirus Receptor in Bats	N
rousettus aegyptiacus	BATS: CARRIERS OF ZOONOTIC VIRAL AND EMERGING INFECTIOUS DISEASES	NO ACCESS
rousettus aegyptiacus	Detection of Novel SARS-like and Other Coronaviruses in Bats from Kenya	Y	none
rousettus aegyptiacus	Coronavirus antibodies in African bat species	Y	A2, A3
rousettus amplexicaudatus	Molecular detection of bat coronaviruses in three bat species in Indonesia	Y	A2, A3
rousettus amplexicaudatus	First Molecular Evidence for Bat Betacoronavirus in Mindanao.	Y	none
rousettus leschenaultii	Presence of Recombinant Bat Coronavirus GCCDC1 in Cambodian Bats	N
rousettus leschenaultii	Establishment of Intestinal Organoid from Rousettus leschenaultii and the Susceptibility to Bat-Associated Viruses, SARS-CoV-2 and Pteropine Orthoreovirus	N
rousettus leschenaultii	Detection of Alpha- and Betacoronaviruses in Miniopterus fuliginosus and Rousettus leschenaultii, two species of Sri Lankan Bats	N
scotophilus dinganii	Metagenomic Analysis Reveals Previously Undescribed Bat Coronavirus Strains in Eswatini	Y	none
scotophilus kuhlii	Identification of Diverse Bat Alphacoronaviruses and Betacoronaviruses in China Provides New Insights Into the Evolution and Origin of Coronavirus-Related Diseases	Y	none
scotophilus kuhlii	Detection of the Severe Acute Respiratory Syndrome-Related Coronavirus and Alphacoronavirus in the Bat Population of Taiwan	Y	none
scotophilus kuhlii	DETECTION OF BAT CORONAVIRUS AND SPECIFIC ANTIBODIES IN CHESTNUT BAT (SCOTOPHILUS KUHLII) POPULATION IN CENTRAL TAIWAN	N
suncus murinus	Discovery of a Highly Divergent Coronavirus in the Asian House Shrew from China Illuminates the Origin of the Alphacoronaviruses	N
sus scrofa	Influenza D virus infection in cattle in Italy	N
sus scrofa	Domestic Pig Unlikely Reservoir for MERS-CoV	N
sus scrofa	Livestock Susceptibility to Infection with Middle East Respiratory Syndrome Coronavirus	N
sus scrofa	Generation and Characterization of Eptesicus fuscus (Big brown bat) kidney cell lines immortalized using the Myotis polyomavirus large T-antigen	N
sus scrofa	Detection of Severe Acute Respiratory Syndrome-Like, Middle East Respiratory Syndrome-Like Bat Coronaviruses and Group H Rotavirus in Faeces of Korean Bats	N
sus scrofa	Hepatitis E: A disease of reemerging importance	N
sus scrofa	Bats as reservoirs of severe emerging infectious diseases	N
sus scrofa	Evolution of genomes, host shifts and the geographic spread of SARS-CoV and related coronaviruses	N
sus scrofa	Porcine innate and adaptative immune responses to influenza and coronavirus infections	N
sus scrofa	Transmission dynamics and susceptibility patterns of SARS-CoV-2 in domestic, farmed and wild animals: Sustainable One Health surveillance for conservation and public health to prevent future epidemics and pandemics	N
sus scrofa	Comprehensive Subcellular Localization of Swine Acute Diarrhea Syndrome Coronavirus Proteins	N
sus scrofa	Swine coronaviruses (SCoVs) and their emerging threats to swine population, inter-species transmission, exploring the susceptibility of pigs for SARS-CoV-2 and zoonotic concerns	N
sus scrofa	Investigations on SARS-CoV-2 Susceptibility of Domestic and Wild Animals Using Primary Cell Culture Models Derived from the Upper and Lower Respiratory Tract	N
sus scrofa	Development of an in vitro model for animal species susceptibility to SARS-CoV-2 replication based on expression of ACE2 and TMPRSS2 in avian cells	N
sus scrofa	Independent infections of porcine deltacoronavirus among Haitian children	N
sus scrofa	Three-Week Old Pigs Are Not Susceptible to Productive Infection with SARS-COV-2	N
sus scrofa	Experimental and field investigations of exposure, replication and transmission of SARS-CoV-2 in pigs in the Netherlands	Y	none
sus scrofa	An alphavirus replicon-based vaccine expressing a stabilized Spike antigen induces protective immunity and prevents transmission of SARS-CoV-2 between cats	N
sus scrofa	Interspecies Jumping of Bat Coronaviruses	N
sus scrofa	Evolutionary Dynamics and Epidemiology of Endemic and Emerging Coronaviruses in Humans, Domestic Animals, and Wildlife	N
sus scrofa	Viruses from poultry and livestock pose continuous threats to human beings	N
sus scrofa	Naturally Occurring Animal Coronaviruses as Models for Studying Highly Pathogenic Human Coronaviral Disease	N
sus scrofa	How related is SARS-CoV-2 to other coronaviruses?	N
sus scrofa	The Coronaviruses of Animals and Birds: Their Zoonosis, Vaccines, and Models for SARS-CoV and SARS-CoV2	N
sus scrofa	Susceptibility of Domestic Swine to Experimental Infection with Severe Acute Respiratory Syndrome Coronavirus 2	N
sus scrofa	Susceptibility of swine cells and domestic pigs to SARS-CoV-2	N
sus scrofa	CORONAVIRUS INFECTIONS: A BRIEF REVIEW	N
sus scrofa	Predicting the angiotensin converting enzyme 2 (ACE2) utilizing as the of SARS-CoV-2	N
sus scrofa	Bats and Coronaviruses	N
sus scrofa	Identification of Diverse Bat Alphacoronaviruses and Betacoronaviruses in China Provides New Insights Into the Evolution and Origin of Coronavirus-Related Diseases	N
sus scrofa	Species-Specific Colocalization of Middle East Respiratory Syndrome Coronavirus Attachment and Entry Receptors	N
sus scrofa	Origin and evolution of pathogenic coronaviruses	N
sus scrofa	Cameroonian fruit bats harbor divergent viruses, including rotavirus H, bastroviruses, and picobirnaviruses using an alternative genetic code	N
sus scrofa	Longitudinal study of age-specific pattern of coronavirus infection in Lyle's flying fox (Pteropus lylei) in Thailand	N
sus scrofa	Hosts and Sources of Endemic Human Coronaviruses	N
sus scrofa	Middle East respiratory syndrome coronavirus experimental transmission using a pig model	N
sus scrofa	Influenza D virus infection in cattle in Italy	N
sus scrofa	Domestic Pig Unlikely Reservoir for MERS-CoV	N
sus scrofa	Livestock Susceptibility to Infection with Middle East Respiratory Syndrome Coronavirus	N
sus scrofa	Generation and Characterization of Eptesicus fuscus (Big brown bat) kidney cell lines immortalized using the Myotis polyomavirus large T-antigen	N
sus scrofa	Detection of Severe Acute Respiratory Syndrome-Like, Middle East Respiratory Syndrome-Like Bat Coronaviruses and Group H Rotavirus in Faeces of Korean Bats	N
sus scrofa	Hepatitis E: A disease of reemerging importance	N
sus scrofa	Bats as reservoirs of severe emerging infectious diseases	N
sus scrofa	Evolution of genomes, host shifts and the geographic spread of SARS-CoV and related coronaviruses	N
tadarida brasiliensis	Experimental Infection of Brazilian Free-Tailed Bats (Tadarida brasiliensis) with Two Strains of SARS-CoV-2	N
tadarida brasiliensis	Generation and Characterization of Eptesicus fuscus (Big brown bat) kidney cell lines immortalized using the Myotis polyomavirus large T-antigen	N
taphozous perforatus	Middle East respiratory syndrome (MERS): bats or dromedary, which of them is responsible?, Le 'syndrome respiratoire du Moyen-Orient' (MERS) : qui est responsable, les chauves-souris ou le dromadaire ?	N
tragelaphus angasii	Investigations on SARS-CoV-2 Susceptibility of Domestic and Wild Animals Using Primary Cell Culture Models Derived from the Upper and Lower Respiratory Tract	N
tragelaphus angasii	Detection and characterization of bovine-like coronaviruses from four species of zoo ruminants	N
tragelaphus spekii	Detection and characterization of bovine-like coronaviruses from four species of zoo ruminants	N
tylonycteris pachypus	Viruses and Bats	N
tylonycteris pachypus	Discovery of Novel Bat Coronaviruses in South China That Use the Same Receptor as Middle East Respiratory Syndrome Coronavirus	Y	none
vespertilio murinus	Virus Diversity, Abundance, and Evolution in Three Different Bat Colonies in Switzerland	Y	A3
vicugna pacos	Investigations on SARS-CoV-2 Susceptibility of Domestic and Wild Animals Using Primary Cell Culture Models Derived from the Upper and Lower Respiratory Tract	N
vicugna pacos	Enhanced replication fitness of MERS-CoV clade B over clade A strains in camelids explains the dominance of clade B strains in the Arabian Peninsula	N
vicugna pacos	Zoonotic origins of human coronavirus 2019 (HCoV-19/SARS-CoV-2): why is this work important?	N
vicugna pacos	Efficacy of an Adjuvanted Middle East Respiratory Syndrome Coronavirus Spike Protein Vaccine in Dromedary Camels and Alpacas	N
vicugna pacos	Livestock Susceptibility to Infection with Middle East Respiratory Syndrome Coronavirus	N
vicugna pacos	MERS-CoV Infection of Alpaca in a Region Where MERS-CoV is Endemic	Y	none

## Sheet: Henipavirus
Sp.	Publication	Field Study	Reservoir evidence	Notes
dobsonia magna	Prevalence of Henipavirus and Rubulavirus Antibodies in Pteropid Bats, Papua New Guinea	Y	none
eidolon dupreanum	Discovery and Genomic Characterization of a Novel Henipavirus, Angavokely Virus, from Fruit Bats in Madagascar	NO ACCESS
eidolon dupreanum	Disentangling serology to elucidate henipa- and filovirus transmission in Madagascar fruit bats	Y	potential maintenance
eidolon helvum	Persistence of Multiple Paramyxoviruses in a Closed Captive Colony of Fruit Bats (Eidolon helvum)	N
eidolon helvum	Longitudinal Secretion of Paramyxovirus RNA in the Urine of Straw-Coloured Fruit Bats (Eidolon helvum)	N
eidolon helvum	What is stirring in the reservoir? Modelling mechanisms of henipavirus circulation in fruit bat hosts	N
eidolon helvum	Henipaviruses at the Interface Between Bats, Livestock and Human Population in Africa: A Review	N
eidolon helvum	Support for viral persistence in bats from age-specific serology and models of maternal immunity	N
eidolon helvum	Henipaviruses at the Interface Between Bats, Livestock and Human Population in Africa.	N
eidolon helvum	Bat trait, genetic and pathogen data from large-scale investigations of African fruit bats, Eidolon helvum	Y	potential maintenance
eidolon helvum	Henipavirus RNA in African Bats	Y	none
eidolon helvum	Type I Interferon Reaction to Viral Infection in Interferon-Competent, Immortalized Cell Lines from the African Fruit Bat Eidolon helvum	N
eidolon helvum	Henipavirus Neutralising Antibodies in an Isolated Island Population of African Fruit Bats	Y	none
eidolon helvum	Social Determinants of a Potential Spillover of Bat-Borne Viruses to Humans in Ghana.	N
eidolon helvum	Evidence for henipavirus spillover into human populations in Africa	N
eidolon helvum	Emerging risks from bat bushmeat in West Africa	N
eidolon helvum	Attachment Protein G of an African Bat Henipavirus Is Differentially Restricted in Chiropteran and Nonchiropteran Cells	N
eidolon helvum	Molecular Epidemiology of Paramyxoviruses in Frugivorous Eidolon helvum Bats in Zambia	N
eidolon helvum	Characterization of African bat henipavirus GH-M74a glycoproteins	N
eidolon helvum	Viral antibody dynamics in a chiropteran host	Y	potential maintenance
eidolon helvum	Use of cross-reactive serological assays for detecting novel pathogens in wildlife: Assessing an appropriate cutoff for henipavirus assays in African bats	Y	potential maintenance
eidolon helvum	Continent-wide panmixia of an African fruit bat facilitates transmission of potentially zoonotic viruses	Y	potential maintenance
eidolon helvum	Metagenomic study of the viruses of African straw-coloured fruit bats: Detection of a chiropteran poxvirus and isolation of a novel adenovirus	N
eidolon helvum	Antibodies to Henipavirus or Henipa-Like Viruses in Domestic Pigs in Ghana, West Africa	N
eidolon helvum	Evidence of Henipavirus Infection in West African Fruit Bats	Y	none
eonycteris spelaea	Eonycteris spelaea) Breeding Colony in Singapore	NO ACCESS
eonycteris spelaea	Introduction: Nipah Virus-Discovery and Origin	N
epomophorus gambianus	The role of African fruit bats in the persistence of filovirus and henipavirus infection	N
epomophorus gambianus	Social Determinants of a Potential Spillover of Bat-Borne Viruses to Humans in Ghana	N
epomophorus gambianus	Evidence of Henipavirus Infection in West African Fruit Bats	Y	none
equus caballus	Climate Change Could Increase the Geographic Extent of Hendra Virus Spillover Risk	N
equus caballus	Hendra Virus Spillover is a Bimodal System Driven by Climatic Factors	N
equus caballus	Cryptic etiopathological conditions of equine nervous system with special emphasis on viral diseases	N
equus caballus	Epidemiological perspectives on Hendra virus infection in horses and flying foxes	N
felis catus	Feral cats and risk for Nipah virus transmission	Y	none
hipposideros armiger	Sequencing the Genome of Indian Flying Fox, Natural Reservoir of Nipah Virus, Using Hybrid Assembly and Conservative Secondary Scaffolding	N
hipposideros armiger	RT-PCR Survey of Emerging Paramyxoviruses in Cave-dwelling Bats	Y	potential maintenance
hipposideros larvatus	RT-PCR Survey of Emerging Paramyxoviruses in Cave-dwelling Bats	Y	potential maintenance
hypsignathus monstrosus	Attachment Protein G of an African Bat Henipavirus Is Differentially Restricted in Chiropteran and Nonchiropteran Cells	N
hypsignathus monstrosus	Characterization of African bat henipavirus GH-M74a glycoproteins	N
hypsignathus monstrosus	Evidence of Henipavirus Infection in West African Fruit Bats	Y	none
myotis daubentonii	Novel Paramyxoviruses in Free-Ranging European Bats	N
myotis daubentonii	Public health awareness of emerging zoonotic viruses of bats: A European perspective	N
pteropus admiralitatum	Emerging henipaviruses and flying foxes - Conservation and management perspectives	N
pteropus alecto	Morphological and quantitative analysis of leukocytes in free-living Australian black flying foxes (Pteropus alecto)."	N
pteropus alecto	[1] "Novel Hendra Virus Variant Circulating in Black Flying Foxes and Grey-Headed Flying Foxes, Australia"	Y	potential maintenance
pteropus alecto	[1] "The persistence of a SIR disease in a metapopulation: Hendra virus epidemics in Australian black flying foxes (Pteropus alecto)"	N
pteropus alecto	[1] "Effects of Waning Maternal Immunity on Infection Dynamics in Seasonally Breeding Wildlife"	N
pteropus alecto	[1] "Using Stochastic Modeling to Predict the Effect of Culling and Colony Dispersal of Bats on Zoonotic Viral Epidemics"	N
pteropus alecto	[1] "Hendra in the Hunter Valley"	N
pteropus alecto	[1] "A Potent Postentry Restriction to Primate Lentiviruses in a Yinpterochiropteran Bat"	N
pteropus alecto	[1] "Sequencing the Genome of Indian Flying Fox, Natural Reservoir of Nipah Virus, Using Hybrid Assembly and Conservative Secondary Scaffolding"	N
pteropus alecto	[1] "Time of year, age class and body condition predict Hendra virus infection in Australian black flying foxes (Pteropus alecto)"	Y	potential maintenance
pteropus alecto	[1] "Environmental drivers of spatiotemporal foraging intensity in fruit bats and implications for Hendra virus ecology"	N
pteropus alecto	[1] "Climate Change Could Increase the Geographic Extent of Hendra Virus Spillover Risk"	N
pteropus alecto	[1] "Hendra Virus Spillover is a Bimodal System Driven by Climatic Factors"	N
pteropus alecto	[1] "PHYSIOLOGIC BIOMARKERS AND HENDRA VIRUS INFECTION IN AUSTRALIAN BLACK FLYING FOXES (PTEROPUS ALECTO)"	NO ACCESS
pteropus alecto	[1] "Conditions affecting the timing and magnitude of Hendra virus shedding across pteropodid bat populations in Australia"	N
pteropus alecto	[1] "Recrudescent Infection Supports Hendra Virus Persistence in Australian Flying-Fox Populations"	N
pteropus alecto	[1] "Physiological stress and Hendra virus in flying-foxes (Pteropus spp.), Australia"	Y	potential maintenance
pteropus alecto	[1] "The impact of human population pressure on flying fox niches and the potential consequences for Hendra virus spillover"	N
pteropus alecto	[1] "Climatic suitability influences species specific abundance patterns of Australian flying foxes and risk of Hendra virus spillover"	N
pteropus alecto	[1] "No Evidence of Hendra Virus Infection in the Australian Flying-fox Ectoparasite Genus Cyclopodia"	N
pteropus alecto	[1] "Hendra Virus Infection Dynamics in Australian Fruit Bats"	Y	none
pteropus alecto	[1] "Cedar Virus: A Novel Henipavirus Isolated from Australian Bats"	Y	none
pteropus alecto	[1] "Models of Eucalypt phenology predict bat population flux"	N
pteropus alecto	[1] "Landscape Utilisation, Animal Behaviour and Hendra Virus Risk"	N
pteropus alecto	[1] "Temporal Variation in Physiological Biomarkers in Black Flying-Foxes (Pteropus alecto), Australia"	N
pteropus alecto	[1] "Hendra Virus Infection Dynamics in the Grey-Headed Flying Fox (Pteropus poliocephalus) at the Southern-Most Extent of Its Range: Further Evidence This Species Does Not Readily Transmit the Virus to Horses"	N
pteropus alecto	[1] "Characterization of the Antigen Processing Machinery and Endogenous Peptide Presentation of a Bat MHC Class I Molecule"	N
pteropus alecto	[1] "Flying-Fox Species Density - A Spatial Risk Factor for Hendra Virus Infection in Horses in Eastern Australia"	N
pteropus alecto	[1] "Natural Hendra Virus Infection in Flying-Foxes - Tissue Tropism and Risk Factors"	N
pteropus alecto	[1] "Duration of Maternal Antibodies against Canine Distemper Virus and Hendra Virus in Pteropid Bats"	N
pteropus alecto	[1] "Spatiotemporal Aspects of Hendra Virus Infection in Pteropid Bats (Flying-Foxes) in Eastern Australia"	N
pteropus alecto	[1] "Routes of Hendra Virus Excretion in Naturally-Infected Flying-Foxes: Implications for Viral Transmission and Spillover Risk"	Y	potential maintenance
pteropus alecto	[1] "Hendra virus survival does not explain spillover patterns and implicates relatively direct transmission routes from flying foxes to horses"	N
pteropus alecto	[1] "Isolation of multiple novel paramyxoviruses from pteropid bat urine"	Y	none
pteropus alecto	[1] "Assessing the risk of Nipah virus establishment in Australian flying-foxes"	N
pteropus alecto	[1] "Analysis of Cathepsin and Furin Proteolytic Enzymes Involved in Viral Fusion Protein Activation in Cells of the Bat Reservoir Host"	N
pteropus alecto	[1] "Focus on: Hendra virus in Australia"	N
pteropus alecto	[1] "Proteomics informed by transcriptomics reveals Hendra virus sensitizes bat cells to TRAIL-mediated apoptosis"	N
pteropus alecto	[1] "Bats and bat-borne diseases: a perspective on Australian megabats"	N
pteropus alecto	[1] "Establishment, Immortalisation and Characterisation of Pteropid Bat Cell Lines"	N
pteropus alecto	[1] "Duration of Maternal Antibodies against Canine Distemper Virus and Hendra Virus in Pteropid Bats."	N
pteropus alecto	[1] "Duration of Maternal Antibodies against Canine Distemper Virus and Hendra Virus in Pteropid Bats."	N
pteropus alecto	[1] "Cloning, expression and antiviral activity of IFN gamma from the Australian fruit bat, Pteropus alecto"	N
pteropus alecto	[1] "Pteropid Bats are Confirmed as the Reservoir Hosts of Henipaviruses: A Comprehensive Experimental Study of Virus Transmission"	N
pteropus alecto	[1] "Interferon Production and Signaling Pathways Are Antagonized during Henipavirus Infection of Fruit Bat Cell Lines"	N
pteropus alecto	[1] "Bats Without Borders: Long-Distance Movements and Implications for Disease Risk Management"	N
pteropus alecto	[1] "Prevalence of Henipavirus and Rubulavirus Antibodies in Pteropid Bats, Papua New Guinea"	Y	none
pteropus alecto	[1] "Epidemiological perspectives on Hendra virus infection in horses and flying foxes"	N
pteropus conspicillatus	Climate Change Could Increase the Geographic Extent of Hendra Virus Spillover Risk	N
pteropus conspicillatus	[1] "Hendra Virus Spillover is a Bimodal System Driven by Climatic Factors"	N
pteropus conspicillatus	[1] "The impact of human population pressure on flying fox niches and the potential consequences for Hendra virus spillover"	N
pteropus conspicillatus	[1] "Physiological stress and Hendra virus in flying-foxes (Pteropus spp.), Australia"	N
pteropus conspicillatus	[1] "Climatic suitability influences species specific abundance patterns of Australian flying foxes and risk of Hendra virus spillover"	N
pteropus conspicillatus	[1] "No Evidence of Hendra Virus Infection in the Australian Flying-fox Ectoparasite Genus Cyclopodia"	N
pteropus conspicillatus	[1] "Evidence of Endemic Hendra Virus Infection in Flying-Foxes (Pteropus conspicillatus)-Implications for Disease Risk Management"	Y	potential maintenance
pteropus conspicillatus	[1] "Hendra Virus Infection Dynamics in Australian Fruit Bats"	Y	none
pteropus conspicillatus	[1] "Models of Eucalypt phenology predict bat population flux"	N
pteropus conspicillatus	[1] "Flying-Fox Species Density - A Spatial Risk Factor for Hendra Virus Infection in Horses in Eastern Australia"	N
pteropus conspicillatus	[1] "Natural Hendra Virus Infection in Flying-Foxes - Tissue Tropism and Risk Factors"	N
pteropus conspicillatus	[1] "Prevalence of Henipavirus and Rubulavirus Antibodies in Pteropid Bats, Papua New Guinea"	Y	none
pteropus giganteus	Reprogrammed Pteropus Bat Stem Cells as A Model to Study Host-Pathogen Interaction during Henipavirus Infection"	N
pteropus giganteus	[1] "Population genetics of fruit bat reservoir informs the dynamics, distribution and diversity of Nipah virus"	N
pteropus giganteus	[1] "Nipah virus dynamics in bats and implications for spillover to humans"	y	potential maintenance
pteropus giganteus	[1] "Sequencing the Genome of Indian Flying Fox, Natural Reservoir of Nipah Virus, Using Hybrid Assembly and Conservative Secondary Scaffolding"	N
pteropus giganteus	[1] "High Pathogenicity of Nipah Virus from Pteropus lylei Fruit Bats, Cambodia"	N
pteropus giganteus	[1] "Nipah virus: epidemiology, pathology, immunobiology and advances in diagnosis, vaccine designing and control strategies - a comprehensive review"	N
pteropus giganteus	[1] "Henipaviruses at the Interface Between Bats, Livestock and Human Population in Africa: A Review"	N
pteropus giganteus	[1] "Nipah Virus Sequences from Humans and Bats during Nipah Outbreak, Kerala, India, 2018"	Y	potential maintenance
pteropus giganteus	[1] "Prioritizing surveillance of Nipah virus in India"	N
pteropus giganteus	[1] "Isolation and Full-Genome Characterization of Nipah Viruses from Bats, Bangladesh"	Y	none
pteropus giganteus	[1] "Circulation of Nipah virus in Pteropus giganteus bats in northeast region of India, 2015"	Y	potential maintenance
pteropus giganteus	[1] "Understanding the interaction between henipaviruses and their natural host, fruit bats: Paving the way toward control of highly lethal infection in humans"	N
pteropus giganteus	[1] "Enhancing preparation for large Nipah outbreaks beyond Bangladesh: Preventing a tragedy like Ebola in West Africa"	N
pteropus giganteus	[1] "Mapping Disease Transmission Risk of Nipah Virus in South and Southeast Asia"	N
pteropus giganteus	[1] "Convergence of Humans, Bats, Trees, and Culture in Nipah Virus Transmission, Bangladesh"	N
pteropus giganteus	[1] "Zoonotic Potential of Emerging Paramyxoviruses: Knowns and Unknowns"	N
pteropus giganteus	[1] "Isolation of Tioman virus from Pteropus giganteus bat in North-East region of India"	N
pteropus giganteus	[1] "Type I Interferon Reaction to Viral Infection in Interferon-Competent, Immortalized Cell Lines from the African Fruit Bat Eidolon helvum"	N
pteropus giganteus	[1] "Mapping the risk of Nipah virus spillover into human populations in South and Southeast Asia"	N
pteropus giganteus	[1] "Role of India's wildlife in the emergence and re-emergence of zoonotic pathogens, risk factors and public health implications"	N
pteropus giganteus	[1] "The Role of Landscape Composition and Configuration on Pteropus giganteus Roosting Ecology and Nipah Virus Spillover Risk in Bangladesh"	N
pteropus giganteus	[1] "Roosting behaviour and habitat selection of Pteropus giganteus reveal potential links to Nipah virus epidemiology"	N
pteropus giganteus	[1] "Piloting the use of indigenous methods to prevent Nipah virus infection by interrupting bats access to date palm sap in Bangladesh"	N
pteropus giganteus	[1] "Henipavirus infection in fruit bats (Pteropus giganteus), India"	Y	none
pteropus hypomelanus	Population genetics of fruit bat reservoir informs the dynamics, distribution and diversity of Nipah virus	N
pteropus hypomelanus	Duration of Maternal Antibodies against Canine Distemper Virus and Hendra Virus in Pteropid Bats	N
pteropus hypomelanus	Genetic characterization of Nipah virus from Thai fruit bats (Pteropus lylei)	N
pteropus hypomelanus	Risk Factors for Nipah Virus Infection among Pteropid Bats, Peninsular Malaysia	Y	potential maintenance
pteropus hypomelanus	Duration of Maternal Antibodies against Canine Distemper Virus and Hendra Virus in Pteropid Bats.	N
pteropus hypomelanus	Duration of Maternal Antibodies against Canine Distemper Virus and Hendra Virus in Pteropid Bats.	N
pteropus hypomelanus	Introduction: Nipah Virus-Discovery and Origin	N
pteropus hypomelanus	Generation of Tioman virus nucleocapsid-like particles in yeast Saccharomyces cerevisiae	N
pteropus hypomelanus	Lessons from the Nipah virus outbreak in Malaysia.	N
pteropus hypomelanus	Feral cats and risk for Nipah virus transmission	N
pteropus hypomelanus	A novel approach for collecting samples from fruit bats for isolation of infectious agents	N
pteropus hypomelanus	Full length genome sequence of Tioman virus, a novel paramyxovirus in the genus Rubulavirus isolated from fruit bats in Malaysia	N
pteropus hypomelanus	Nipah virus encephalitis outbreak in Malaysia	N
pteropus hypomelanus	Isolation of Nipah virus from Malaysian Island flying-foxes	Y	none
pteropus lylei	Mapping Risk of Nipah Virus Transmission from Bats to Humans in Thailand	N
pteropus lylei	High Pathogenicity of Nipah Virus from Pteropus lylei Fruit Bats, Cambodia	N
pteropus lylei	Genetic diversity and relationships among Lyle's flying fox colonies in Thailand.	N
pteropus lylei	Genetic characterization of Nipah virus from Thai fruit bats (Pteropus lylei)	Y	potential maintenance
pteropus lylei	Drinking bat blood may be hazardous to your health	N
pteropus lylei	Antibodies to Nipah-like virus in bats (Pteropus lylei), Cambodia	Y	none
pteropus neohibernicus	Bats Without Borders: Long-Distance Movements and Implications for Disease Risk Management	N
pteropus neohibernicus	Emerging henipaviruses and flying foxes - Conservation and management perspectives	N
pteropus poliocephalus	Novel Hendra Virus Variant Circulating in Black Flying Foxes and Grey-Headed Flying Foxes, Australia	Y	potential maintenance
pteropus poliocephalus	A new Hendra virus genotype found in Australian flying foxes.	Y	none
pteropus poliocephalus	4 Seroprevalence of three paramyxoviruses; Hendra virus, Tioman virus, Cedar virus and a rhabdovirus, Australian bat lyssavirus, in a range expanding fruit bat, the Grey-headed flying fox (Pteropus poliocephalus)	Y	potential maintenance
pteropus poliocephalus	Time of year, age class and body condition predict Hendra virus infection in Australian black flying foxes (Pteropus alecto)	Y	potential maintenance
pteropus poliocephalus	Environmental drivers of spatiotemporal foraging intensity in fruit bats and implications for Hendra virus ecology	N
pteropus poliocephalus	Changing resource landscapes and spillover of henipaviruses	N
pteropus poliocephalus	Hendra Virus Spillover is a Bimodal System Driven by Climatic Factors	N
pteropus poliocephalus	Recrudescent Infection Supports Hendra Virus Persistence in Australian Flying-Fox Populations	N
pteropus poliocephalus	Physiological stress and Hendra virus in flying-foxes (Pteropus spp.), Australia	Y	none
pteropus poliocephalus	No Evidence of Hendra Virus Infection in the Australian Flying-fox Ectoparasite Genus Cyclopodia	N
pteropus poliocephalus	Hendra Virus Infection Dynamics in Australian Fruit Bats	Y	none
pteropus poliocephalus	Cedar Virus: A Novel Henipavirus Isolated from Australian Bats	Y	none
pteropus poliocephalus	Models of Eucalypt phenology predict bat population flux	N
pteropus poliocephalus	Hendra Virus Infection Dynamics in the Grey-Headed Flying Fox (Pteropus poliocephalus) at the Southern-Most Extent of Its Range: Further Evidence This Species Does Not Readily Transmit the Virus to Horses	Y	none
pteropus poliocephalus	Spatiotemporal Aspects of Hendra Virus Infection in Pteropid Bats (Flying-Foxes) in Eastern Australia	N
pteropus poliocephalus	Routes of Hendra Virus Excretion in Naturally-Infected Flying-Foxes: Implications for Viral Transmission and Spillover Risk	Y	none
pteropus poliocephalus	Animal models of disease shed light on Nipah virus pathogenesis and transmission	N
pteropus poliocephalus	Focus on: Hendra virus in Australia	N
pteropus poliocephalus	Recent progress in henipavirus research: Molecular biology, genetic diversity, animal models	N
pteropus poliocephalus	Design and evaluation of consensus PCR assays for henipaviruses	N
pteropus poliocephalus	Animal models of henipavirus infection: A review	N
pteropus poliocephalus	Recent progress in henipavirus research	N
pteropus poliocephalus	Experimental Nipah virus infection in pteropid bats (Pteropus poliocephalus)	N
pteropus poliocephalus	Infection and disease in reservoir and spillover hosts: Determinants of pathogen emergence	N
pteropus poliocephalus	Emerging henipaviruses and flying foxes - Conservation and management perspectives	N
pteropus poliocephalus	Pulau virus; a new member of the Nelson Bay orthoreovirus species isolated from fruit bats in Malaysia	Y	none
pteropus poliocephalus	Isolation of Hendra virus from pteropid bats: a natural reservoir of Hendra virus	N
pteropus poliocephalus	Experimental Hendra virus infection in pregnant guinea-pigs and fruit bats (Pteropus poliocephalus)	N
pteropus poliocephalus	Transmission studies of Hendra virus (equine morbillivirus) in fruit bats, horses and cats	N
pteropus rufus	Disentangling serology to elucidate henipa- and filovirus transmission in Madagascar fruit bats	Y	none
pteropus scapulatus	A new Hendra virus genotype found in Australian flying foxes.	Y	none
pteropus scapulatus	Time of year, age class and body condition predict Hendra virus infection in Australian black flying foxes (Pteropus alecto)	Y	potential maintenance
pteropus scapulatus	Hendra Virus Spillover is a Bimodal System Driven by Climatic Factors	N
pteropus scapulatus	Physiological stress and Hendra virus in flying-foxes (Pteropus spp.), Australia	Y	none
pteropus scapulatus	Transmission or Within-Host Dynamics Driving Pulses of Zoonotic Viruses in Reservoir-Host Populations	N
pteropus scapulatus	Hendra Virus Infection Dynamics in Australian Fruit Bats	Y	none
pteropus scapulatus	Models of Eucalypt phenology predict bat population flux	N
pteropus scapulatus	Flying-Fox Species Density - A Spatial Risk Factor for Hendra Virus Infection in Horses in Eastern Australia	N
pteropus scapulatus	Spatiotemporal Aspects of Hendra Virus Infection in Pteropid Bats (Flying-Foxes) in Eastern Australia	N
pteropus scapulatus	Routes of Hendra Virus Excretion in Naturally-Infected Flying-Foxes: Implications for Viral Transmission and Spillover Risk	Y	none
pteropus scapulatus	Reproduction and nutritional stress are risk factors for Hendra virus infection in little red flying foxes (Pteropus scapulatus)	Y	potential maintenance
pteropus vampyrus	Reprogrammed Pteropus Bat Stem Cells as A Model to Study Host-Pathogen Interaction during Henipavirus Infection	N
pteropus vampyrus	Population genetics of fruit bat reservoir informs the dynamics, distribution and diversity of Nipah virus	N
pteropus vampyrus	Sequencing the Genome of Indian Flying Fox, Natural Reservoir of Nipah Virus, Using Hybrid Assembly and Conservative Secondary Scaffolding	N
pteropus vampyrus	Qualitative Release Assessment to Estimate the Likelihood of Henipavirus Entering the United Kingdom	N
pteropus vampyrus	Henipavirus Neutralising Antibodies in an Isolated Island Population of African Fruit Bats	Y	none
pteropus vampyrus	Transcriptome Profiling of the Virus-Induced Innate Immune Response in Pteropus vampyrus and Its Attenuation by Nipah Virus Interferon Antagonist Functions	N
pteropus vampyrus	Animal models of disease shed light on Nipah virus pathogenesis and transmission	N
pteropus vampyrus	Genetic characterization of Nipah virus from Thai fruit bats (Pteropus lylei)	N
pteropus vampyrus	Viral antibody dynamics in a chiropteran host	N
pteropus vampyrus	The Application of One Health Approaches to Henipavirus Research	N
pteropus vampyrus	Risk Factors for Nipah Virus Infection among Pteropid Bats, Peninsular Malaysia	Y	none
pteropus vampyrus	Ecology of Zoonotic Infectious Diseases in Bats: Current Knowledge and Future Directions	N
pteropus vampyrus	Nipah Virus in the Fruit Bat Pteropus vampyrus in Sumatera, Indonesia	Y	potential maintenance
pteropus vampyrus	Agricultural intensification, priming for persistence and the emergence of Nipah virus: a lethal bat-borne zoonosis	N
pteropus vampyrus	Pteropid Bats are Confirmed as the Reservoir Hosts of Henipaviruses: A Comprehensive Experimental Study of Virus Transmission	N
pteropus vampyrus	Bats Without Borders: Long-Distance Movements and Implications for Disease Risk Management	N
pteropus vampyrus	Characterization of Nipah Virus from Naturally Infected Pteropus vampyrus Bats, Malaysia	Y	none
pteropus vampyrus	Emerging henipaviruses and flying foxes - Conservation and management perspectives	N
pteropus vampyrus	Henipavirus in Pteropus vampyrus bats, Indonesia	Y	none
pteropus vampyrus	Isolation of Nipah virus from Malaysian Island flying-foxes	Y	none
rattus tanezumi	Novel Henipa-like Virus, Mojiang Paramyxovirus, in Rats, China, 2012	Y	none
rhinolophus affinis	Isolation of a Novel Bat Rhabdovirus with Evidence of Human Exposure in China	N
rhinolophus sinicus	Sequencing the Genome of Indian Flying Fox, Natural Reservoir of Nipah Virus, Using Hybrid Assembly and Conservative Secondary Scaffolding	N
sus scrofa	The pathogenesis of Nipah virus: A review.	N
sus scrofa	Henipavirus Immune Evasion and Pathogenesis Mechanisms: Lessons Learnt from Natural Infection and Animal Models	N
sus scrofa	The pig as an amplifying host for new and emerging zoonotic viruses	N
sus scrofa	Nipah virus: epidemiology, pathology, immunobiology and advances in diagnosis, vaccine designing and control strategies - a comprehensive review	N
sus scrofa	Optimization and diagnostic evaluation of monoclonal antibody-based blocking ELISA formats for detection of neutralizing antibodies to Hendra virus in mammalian sera	N
sus scrofa	Henipaviruses at the Interface Between Bats, Livestock and Human Population in Africa: A Review	N
sus scrofa	Evidence of exposure to henipaviruses in domestic pigs in Uganda	Y	none
sus scrofa	Vaccine Development for Nipah Virus Infection in Pigs	N
sus scrofa	Transmission of henipaviruses	N
sus scrofa	Enhancing preparation for large Nipah outbreaks beyond Bangladesh: Preventing a tragedy like Ebola in West Africa	N
sus scrofa	Indirect ELISA based on Hendra and Nipah virus proteins for the detection of henipavirus specific antibodies in pigs	N
sus scrofa	Detection of Severe Acute Respiratory Syndrome-Like, Middle East Respiratory Syndrome-Like Bat Coronaviruses and Group H Rotavirus in Faeces of Korean Bats	N
sus scrofa	Protection against henipaviruses in swine requires both, cell-mediated and humoral immune response	N
sus scrofa	Hendra virus and Nipah virus animal vaccines	N
sus scrofa	Origin and Evolution of Nipah Virus	N
sus scrofa	BAT-BORNE ZOONOTIC VIRUSES RISK OF EMERGENCE IN EUROPE: HENDRA VIRUS, MENANGLE VIRUS AND NIPAH VIRUS	N
sus scrofa	Bats as reservoirs of severe emerging infectious diseases	N
sus scrofa	The pandemic potential of Nipah virus	N
sus scrofa	Socio-economic, industrial and cultural parameters of pig-borne infections	N
sus scrofa	Agricultural intensification, priming for persistence and the emergence of Nipah virus: a lethal bat-borne zoonosis	N
sus scrofa	Detection and genetic characterization of a novel pig astrovirus: relationship to other astroviruses	N
sus scrofa	Antibodies to Henipavirus or Henipa-Like Viruses in Domestic Pigs in Ghana, West Africa	N
sus scrofa	Transmission of Human Infection with Nipah Virus	N
sus scrofa	Generation of Tioman virus nucleocapsid-like particles in yeast Saccharomyces cerevisiae	N
sus scrofa	Animal models of henipavirus infection: A review	N
sus scrofa	Bats and Emerging Zoonoses: Henipaviruses and SARS	N
sus scrofa	Nipah Virus Infection in Dogs, Malaysia, 1999	N
sus scrofa	Henipaviruses: A new family of emerging Paramyxoviruses	N
sus scrofa	Nipah virus encephalitis.	N
sus scrofa	[Nipah encephalitis].	N
sus scrofa	Recent progress in henipavirus research	N
sus scrofa	Nipah virus outbreak in Malaysia	N
sus scrofa	Nipah virus encephalitis outbreak in Malaysia	N
sus scrofa	Emerging viral diseases of Southeast Asia and the Western Pacific	N
sus scrofa	Newly discovered viruses of flying foxes	N

## Sheet: Betacoronavirus
Sp.	Publication	Field Study	Reservoir evidence	Notes
apodemus chevrieri	Detection of alpha- and betacoronaviruses in rodents from Yunnan, China	Y	none
arctonyx collaris	Coronaviruses in wild animals sampled in and around Wuhan at the beginning of COVID-19 emergence	Y	none
aselliscus stoliczkanus	Variation in synonymous nucleotide composition among genomes of sarbecoviruses and consequences for the origin of COVID-19	N
aselliscus stoliczkanus	Genomic Characterization of Diverse Bat Coronavirus HKU10 in Hipposideros Bats	Y	none
bison bonasus	Detection and characterization of bovine-like coronaviruses from four species of zoo ruminants	N
bos taurus	Investigations on SARS-CoV-2 Susceptibility of Domestic and Wild Animals Using Primary Cell Culture Models Derived from the Upper and Lower Respiratory Tract	N
bos taurus	One Health and Cattle Genetic Resources: Mining More than 500 Cattle Genomes to Identify Variants in Candidate Genes Potentially Affecting Coronavirus Infections	N
camelus bactrianus	Serological exposure in Bactrian and dromedary camels in Kazakhstan to a MERS or MERS-like coronavirus	Y	none
camelus bactrianus	Establishment of well-differentiated camelid airway cultures to study Middle East respiratory syndrome coronavirus	N
camelus bactrianus	Middle East respiratory syndrome coronavirus infection in camelids	N
camelus bactrianus	Investigations on SARS-CoV-2 Susceptibility of Domestic and Wild Animals Using Primary Cell Culture Models Derived from the Upper and Lower Respiratory Tract	N
camelus bactrianus	Middle East Respiratory Syndrome-Coronavirus Seropositive Bactrian Camels, Mongolia	Y	none
camelus bactrianus	Middle East Respiratory Syndrome Coronavirus Antibodies in Bactrian and Hybrid Camels from Dubai	Y	none
camelus bactrianus	Bactrian camels shed large quantities of Middle East respiratory syndrome coronavirus (MERS-CoV) after experimental infection	Y	none
camelus bactrianus	First isolation of West Nile virus from a dromedary camel	N
camelus bactrianus	Absence of Middle East Respiratory Syndrome Coronavirus in Camelids, Kazakhstan, 2015	Y	none
camelus bactrianus	Zoonotic origins of human coronavirus 2019 (HCoV-19/SARS-CoV-2): why is this work important?	N
camelus dromedarius	The Middle East respiratory syndrome coronavirus in the breath of some infected dromedary camels (Camelus dromedarius)	Y	none
camelus dromedarius	Qatar experience on One Health approach for middle-east respiratory syndrome coronavirus, 2012-2017: A viewpoint	N
camelus dromedarius	A rapid scoping review of Middle East respiratory syndrome coronavirus in animal hosts	N
camelus dromedarius	Efficacy of an Adjuvanted Middle East Respiratory Syndrome Coronavirus Spike Protein Vaccine in Dromedary Camels and Alpacas	N
camelus dromedarius	Mapping Potential Amplification and Transmission Hotspots for MERS-CoV, Kenya	N
camelus dromedarius	Reported Direct and Indirect Contact with Dromedary Camels among Laboratory-Confirmed MERS-CoV Cases	N
camelus dromedarius	Bartonella dromedarii sp. nov. Isolated from Domesticated Camels (Camelus dromedarius) in Israel	N
camelus dromedarius	The sample of choice for detecting Middle East respiratory syndrome coronavirus in asymptomatic dromedary camels using real-time reverse-transcription polymerase chain reaction	Y	none
camelus dromedarius	MERS and the dromedary camel trade between Africa and the Middle East	N
camelus dromedarius	MERS-CoV Infection of Alpaca in a Region Where MERS-CoV is Endemic	Y	none
camelus dromedarius	Replication and Shedding of MERS-CoV in Upper Respiratory Tract of Inoculated Dromedary Camels	N
camelus dromedarius	Middle East respiratory syndrome (MERS): bats or dromedary, which of them is responsible?, Le 'syndrome respiratoire du Moyen-Orient' (MERS) : qui est responsable, les chauves-souris ou le dromadaire ?	N
camelus dromedarius	Antibodies against MERS Coronavirus in Dromedaries, United Arab Emirates, 2003 and 2013	Y	potential maintenance
canis lupus	Transmission of SARS-CoV-2 from humans to animals and potential host adaptation	N
canis lupus	Investigations on SARS-CoV-2 Susceptibility of Domestic and Wild Animals Using Primary Cell Culture Models Derived from the Upper and Lower Respiratory Tract	N
capra hircus	Development of an in vitro model for animal species susceptibility to SARS-CoV-2 replication based on expression of ACE2 and TMPRSS2 in avian cells	N
cervus elaphus	Serological screening in wild ruminants in Germany, 2021/2022: No evidence of SARS-CoV-2, bluetongue virus or pestivirus spread but high seroprevalences against Schmallenberg virus	Y	none
chaerephon pumilus	Coronavirus and Paramyxovirus Shedding by Bats in a Cave and Buildings in Ethiopia	Y	none
chaerephon pumilus	Metagenomic Analysis Reveals Previously Undescribed Bat Coronavirus Strains in Eswatini	Y	none
chaerephon pumilus	Identification of Coronaviruses, Paramyxoviruses, Reoviruses, and Rotaviruses among Bats in Nigeria	Y	none
chlorocebus aethiops	Development of an in vitro model for animal species susceptibility to SARS-CoV-2 replication based on expression of ACE2 and TMPRSS2 in avian cells	N
chlorocebus aethiops	Independent infections of porcine deltacoronavirus among Haitian children	N
chlorocebus aethiops	Enhanced replication fitness of MERS-CoV clade B over clade A strains in camelids explains the dominance of clade B strains in the Arabian Peninsula	N
chlorocebus aethiops	Susceptibility of livestock to SARS-CoV-2 infection	N
chlorocebus aethiops	SARS-CoV-2 evolution in animals suggests mechanisms for rapid variant selection	N
chlorocebus aethiops	Type I and III IFNs produced by the nasal epithelia and dimmed inflammation are features of alpacas resolving MERS-CoV infection	N
chlorocebus aethiops	A pneumonia outbreak associated with a new coronavirus of probable bat origin (vol 579, pg 270, 2020)	N
chlorocebus aethiops	Development of a Fluorescence-Based, High-Throughput SARS-CoV-2 3CL(p)(ro) Reporter Assay	N
chlorocebus aethiops	Isolation of SARS-CoV-2-related coronavirus from Malayan pangolins	N
chlorocebus aethiops	Using the spike protein feature to predict infection risk and monitor the evolutionary dynamic of coronavirus	N
chlorocebus aethiops	Trypsin Treatment Unlocks Barrier for Zoonotic Bat Coronavirus Infection	N
chlorocebus aethiops	Livestock Susceptibility to Infection with Middle East Respiratory Syndrome Coronavirus	N
chlorocebus aethiops	Immunogenicity of Candidate MERS-CoV DNA Vaccines Based on the Spike Protein	N
chlorocebus aethiops	Link of a ubiquitous human coronavirus to dromedary camels	N
chlorocebus aethiops	First isolation of West Nile virus from a dromedary camel	N
chlorocebus aethiops	Replication and shedding of MERS-CoV in Jamaican fruit bats (Artibeus jamaicensis)	N
chlorocebus aethiops	Serologic Assessment of Possibility for MERS-CoV Infection in Equids	N
chlorocebus aethiops	CD26/DPP4 Cell-Surface Expression in Bat Cells Correlates with Bat Cell Susceptibility to Middle East Respiratory Syndrome Coronavirus (MERS-CoV) Infection and Evolution of Persistent Infection	N
chlorocebus aethiops	Pathways of cross-species transmission of synthetically reconstructed zoonotic severe acute respiratory syndrome coronavirus	N
chlorocebus aethiops	Severe acute respiratory syndrome coronavirus persistence in Vero cells	N
chlorocebus sabaeus	ACE2 receptor usage reveals variation in susceptibility to SARS-CoV and SARS-CoV-2 infection among bat species	N
cynopterus brachyotis	Molecular detection of bat coronaviruses in three bat species in Indonesia	Y	potential maintenance
cynopterus brachyotis	First Molecular Evidence for Bat Betacoronavirus in Mindanao.	Y	none
cynopterus brachyotis	Detection and characterization of a novel bat-borne coronavirus in Singapore using multiple molecular approaches	Y	none
cynopterus brachyotis	Identification of a Lineage D Betacoronavirus in Cave Nectar Bats (Eonycteris spelaea) in Singapore and an Overview of Lineage D Reservoir Ecology in SE Asian Bats	Y	none
cynopterus sphinx	Presence of Recombinant Bat Coronavirus GCCDC1 in Cambodian Bats	Y	none
cynopterus sphinx	Identification of Diverse Bat Alphacoronaviruses and Betacoronaviruses in China Provides New Insights Into the Evolution and Origin of Coronavirus-Related Diseases	Y	none
cynopterus sphinx	Diversity of coronavirus in bats from Eastern Thailand	Y	none
cynopterus sphinx	Serological Evidence of Toxoplasma gondii Infection in Five Species of Bats in China	N
dobsonia moluccensis	Detection of coronavirus genomes in Moluccan naked-backed fruit bats in Indonesia	Y	none
eidolon dupreanum	Full Genome Nobecovirus Sequences From Malagasy Fruit Bats Define a Unique Evolutionary History for This Coronavirus Clade	Y	potential maintenance
eidolon dupreanum	Detection of new genetic variants of Betacoronaviruses in Endemic Frugivorous Bats of Madagascar	Y	none
eidolon helvum	Identification of Coronaviruses, Paramyxoviruses, Reoviruses, and Rotaviruses among Bats in Nigeria	Y	none
eidolon helvum	Cameroonian fruit bats harbor divergent viruses, including rotavirus H, bastroviruses, and picobirnaviruses using an alternative genetic code	N
eidolon helvum	Detection of Novel SARS-like and Other Coronaviruses in Bats from Kenya	Y	none
eidolon helvum	Coronavirus antibodies in African bat species	Y	none
eonycteris spelaea	Eonycteris spelaea) Breeding Colony in Singapore.	N
eonycteris spelaea	Longitudinal monitoring in Cambodia suggests higher circulation of alpha and betacoronaviruses in juvenile and immature bats of three species	Y	none
eonycteris spelaea	Presence of Recombinant Bat Coronavirus GCCDC1 in Cambodian Bats	Y	none
eonycteris spelaea	Detection of Recombinant Rousettus Bat Coronavirus GCCDC1 in Lesser Dawn Bats (Eonycteris spelaea) in Singapore	Y	none
eonycteris spelaea	Identification of a Lineage D Betacoronavirus in Cave Nectar Bats (Eonycteris spelaea) in Singapore and an Overview of Lineage D Reservoir Ecology in SE Asian Bats	Y	potential maintenance
epomophorus gambianus	Identification of Coronaviruses, Paramyxoviruses, Reoviruses, and Rotaviruses among Bats in Nigeria	Y	none
epomophorus gambianus	Cameroonian fruit bats harbor divergent viruses, including rotavirus H, bastroviruses, and picobirnaviruses using an alternative genetic code	Y	none
epomophorus gambianus	Tissue Distribution of the MERS-Coronavirus Receptor in Bats	N
epomophorus gambianus	Coronavirus antibodies in African bat species	Y	none
epomops franqueti	Coronavirus antibodies in African bat species	Y	none
eptesicus serotinus	Novel coronaviruses, astroviruses, adenoviruses and circoviruses in insectivorous bats from northern China	Y	none
eptesicus serotinus	Tissue Distribution of the MERS-Coronavirus Receptor in Bats	N
eptesicus serotinus	Alpha and lineage C betaCoV infections in Italian bats	Y	none
equus caballus	Development of an in vitro model for animal species susceptibility to SARS-CoV-2 replication based on expression of ACE2 and TMPRSS2 in avian cells	N
erinaceus amurensis	MERS-related CoVs in hedgehogs from Hubei Province, China	Y	potential maintenance
erinaceus amurensis	Eco-Virological Preliminary Study of Potentially Emerging Pathogens in Hedgehogs (Erinaceus europaeus) Recovered at a Wildlife Treatment and Rehabilitation Center in Northern Italy	N
erinaceus amurensis	Identification of a Novel Betacoronavirus (Merbecovirus) in Amur Hedgehogs from China	Y	none
erinaceus europaeus	First detection of Hedgehog coronavirus 1 in Poland	Y	none
erinaceus europaeus	Eco-Virological Preliminary Study of Potentially Emerging Pathogens in Hedgehogs (Erinaceus europaeus) Recovered at a Wildlife Treatment and Rehabilitation Center in Northern Italy	Y	potential maintenance
erinaceus europaeus	Can Coronaviruses Steal Genes from the Host as Evidenced in Western European Hedgehogs by EriCoV Genetic Characterization?	Y	none
erinaceus europaeus	Cross-species transmission of the newly identified coronavirus 2019-nCoV	N
erinaceus europaeus	Extension of the known distribution of a novel clade C betacoronavirus in a wildlife host	Y	potential maintenance
erinaceus roumanicus	First detection of Hedgehog coronavirus 1 in Poland	N
erinaceus roumanicus	Eco-Virological Preliminary Study of Potentially Emerging Pathogens in Hedgehogs (Erinaceus europaeus) Recovered at a Wildlife Treatment and Rehabilitation Center in Northern Italy	N
felis catus	Transmission of SARS-CoV-2 from humans to animals and potential host adaptation	N
felis catus	Development of an in vitro model for animal species susceptibility to SARS-CoV-2 replication based on expression of ACE2 and TMPRSS2 in avian cells	N
hemitragus jemlahicus	Detection and characterization of bovine-like coronaviruses from four species of zoo ruminants	N
hipposideros armiger	Development of an in vitro model for animal species susceptibility to SARS-CoV-2 replication based on expression of ACE2 and TMPRSS2 in avian cells	N
hipposideros armiger	Longitudinal monitoring in Cambodia suggests higher circulation of alpha and betacoronaviruses in juvenile and immature bats of three species	Y	none
hipposideros armiger	Molecular evolution and phylogenetic analysis of SARS-CoV-2 and hosts ACE2 protein suggest Malayan pangolin as intermediary host	N
hipposideros armiger	Entry of Scotophilus Bat Coronavirus-512 and Severe Acute Respiratory Syndrome Coronavirus in Human and Multiple Animal Cells	N
hipposideros caffer	Coronavirus antibodies in African bat species	Y	none
hipposideros larvatus	Longitudinal monitoring in Cambodia suggests higher circulation of alpha and betacoronaviruses in juvenile and immature bats of three species	Y	potential maintenance
hipposideros larvatus	Genomic Characterization of Diverse Bat Coronavirus HKU10 in Hipposideros Bats	N	A1, A2
hipposideros lekaguli	Diversity of coronavirus in bats from Eastern Thailand	Y	none
hipposideros pomona	Genomic Characterization of Diverse Bat Coronavirus HKU10 in Hipposideros Bats	N	A2, A3
hipposideros pomona	Coexistence of multiple coronaviruses in several bat colonies in an abandoned mineshaft	Y	none
hipposideros ruber	Detection of Alpha- and Betacoronaviruses in Frugivorous and Insectivorous Bats in Nigeria	Y	none
hipposideros ruber	Identification of Coronaviruses, Paramyxoviruses, Reoviruses, and Rotaviruses among Bats in Nigeria	Y	potential maintenance
hippotragus niger	Bovine-Like Coronaviruses Isolated from Four Species of Captive Wild Ruminants Are Homologous to Bovine Coronaviruses, Based on Complete Genomic Sequences	N
hypsugo savii	Detection of Coronaviruses in Bats of Various Species in Italy	Y	none
hystrix brachyura	Coronavirus testing indicates transmission risk increases along wildlife supply chains for human consumption in Viet Nam, 2013-2014	Y	none
ia io	Genetic diversity of bat coronaviruses and comparative genetic analysis of MERS-related coronaviruses in South Korea	NO ACCESS
ia io	Discovery of Novel Bat Coronaviruses in South China That Use the Same Receptor as Middle East Respiratory Syndrome Coronavirus	Y	potential maintenance
kobus ellipsiprymnus	Bovine-Like Coronaviruses Isolated from Four Species of Captive Wild Ruminants Are Homologous to Bovine Coronaviruses, Based on Complete Genomic Sequences	N
macaca mulatta	COVID-19: animals, veterinary and zoonotic links	N
macaca mulatta	Host Species Restriction of Middle East Respiratory Syndrome Coronavirus through Its Receptor, Dipeptidyl Peptidase 4	N
macroglossus minimus	Molecular detection of bat coronaviruses in three bat species in Indonesia	Y	none
macroglossus minimus	First Molecular Evidence for Bat Betacoronavirus in Mindanao.	Y	none
macroglossus minimus	Identification of a Lineage D Betacoronavirus in Cave Nectar Bats (Eonycteris spelaea) in Singapore and an Overview of Lineage D Reservoir Ecology in SE Asian Bats	Y	none
manis javanica	Variation in synonymous nucleotide composition among genomes of sarbecoviruses and consequences for the origin of COVID-19	N
manis javanica	Shifts in global bat diversity suggest a possible role of climate change in the emergence of SARS-CoV-1 and SARS-CoV-2	N
manis javanica	How related is SARS-CoV-2 to other coronaviruses?	N
manis javanica	Molecular evolution and phylogenetic analysis of SARS-CoV-2 and hosts ACE2 protein suggest Malayan pangolin as intermediary host	N
manis javanica	Viral, host and environmental factors that favor anthropozoonotic spillover of coronaviruses: An opinionated review, focusing on SARS-CoV, MERS-CoV and SARS-CoV-2	N
manis javanica	A Genomic Perspective on the Origin and Emergence of SARS-CoV-2	N
manis javanica	Zoonotic origins of human coronavirus 2019 (HCoV-19/SARS-CoV-2): why is this work important?	N
manis javanica	Isolation of SARS-CoV-2-related coronavirus from Malayan pangolins	Y	none
manis javanica	In silico studies on the comparative characterization of the interactions of SARS-CoV-2 spike glycoprotein with ACE-2 receptor homologs and human TLRs	N
manis javanica	Identifying SARS-CoV-2-related coronaviruses in Malayan pangolins	Y	potential maintenance
manis javanica	Cross-species transmission of the newly identified coronavirus 2019-nCoV	N
megaerops niphanae	Genetic diversity of coronaviruses in bats in Lao PDR and Cambodia	Y	none
mesocricetus auratus	Transmission of SARS-CoV-2 from humans to animals and potential host adaptation	N
mesocricetus auratus	Development of an in vitro model for animal species susceptibility to SARS-CoV-2 replication based on expression of ACE2 and TMPRSS2 in avian cells	N
miniopterus schreibersii	Long-term surveillance of bat coronaviruses in Korea: Diversity and distribution pattern	Y	none
miniopterus schreibersii	Coexistence of multiple coronaviruses in several bat colonies in an abandoned mineshaft	Y	none
mops condylurus	Metagenomic Analysis Reveals Previously Undescribed Bat Coronavirus Strains in Eswatini	N
mops condylurus	Identification of Coronaviruses, Paramyxoviruses, Reoviruses, and Rotaviruses among Bats in Nigeria	Y	none
mus musculus	First Coronavirus Active Survey in Rodents From the Canary Islands	Y	potential maintenance
mus musculus	Peridomestic Mammal Susceptibility to Severe Acute Respiratory Syndrome Coronavirus 2 Infection	N
mus musculus	Molecular evolution and phylogenetic analysis of SARS-CoV-2 and hosts ACE2 protein suggest Malayan pangolin as intermediary host	N
mus musculus	Predicting the angiotensin converting enzyme 2 (ACE2) utilizing as the of SARS-CoV-2	N
mustela lutreola	No Evidence of SARS-CoV-2 Infection in Wild Mink (Mustela lutreola and Neogale vison) from Northern Spain during the First Two Years of Pandemic	N
mustela putorius	Investigations on SARS-CoV-2 Susceptibility of Domestic and Wild Animals Using Primary Cell Culture Models Derived from the Upper and Lower Respiratory Tract	N
myodes glareolus	Discovery of a Novel Coronavirus in Swedish Bank Voles (Myodes glareolus)	Y	potential maintenance
myodes glareolus	Experimental SARS-CoV-2 Infection of Bank Voles	N
myonycteris torquata	Coronavirus antibodies in African bat species	Y	none
myotis dasycneme	Utilizing the VirIdAl Pipeline to Search for Viruses in the Metagenomic Data of Bat Samples	N
myotis daubentonii	The Genetic Characterization of the First Detected Bat Coronaviruses in Poland Revealed SARS-Related Types and Alphacoronaviruses	Y	none
myotis daubentonii	Alphacoronavirus in a Daubenton's Myotis Bat (Myotis daubentonii) in Sweden	N
myotis daubentonii	Utilizing the VirIdAl Pipeline to Search for Viruses in the Metagenomic Data of Bat Samples	N
myotis daubentonii	Long-term surveillance of bat coronaviruses in Korea: Diversity and distribution pattern	N
myotis daubentonii	Angiotensin-converting enzyme 2 (ACE2) proteins of different bat species confer variable susceptibility to SARS-CoV entry	N
myotis emarginatus	A Cross Sectional Sampling Reveals Novel Coronaviruses in Bat Populations of Georgia	N
myotis emarginatus	Novel Alphacoronaviruses and Paramyxoviruses Cocirculate with Type 1 and Severe Acute Respiratory System (SARS)-Related Betacoronaviruses in Synanthropic Bats of Luxembourg	Y	none
myotis formosus	Detection of the Severe Acute Respiratory Syndrome-Related Coronavirus and Alphacoronavirus in the Bat Population of Taiwan	Y	none
myotis horsfieldii	Genetic diversity of coronaviruses in bats in Lao PDR and Cambodia	Y	none
myotis ricketti	Novel coronaviruses, astroviruses, adenoviruses and circoviruses in insectivorous bats from northern China	Y	none
neovison vison	Systematic Tracing of Susceptible Animals to SARS-CoV-2 by a Bioinformatics Framework	N
neovison vison	SARS-CoV-2 infection in cats and dogs in infected mink farms	N
neovison vison	Transmission dynamics and susceptibility patterns of SARS-CoV-2 in domestic, farmed and wild animals: Sustainable One Health surveillance for conservation and public health to prevent future epidemics and pandemics	N
neovison vison	Manifestation of SARS-CoV-2 Infections in Mink Related to Host-, Virus- and Farm-Associated Factors, The Netherlands 2020
neovison vison	No Evidence of SARS-CoV-2 Infection in Wild Mink (Mustela lutreola and Neogale vison) from Northern Spain during the First Two Years of Pandemic
neovison vison	SARS-CoV-2 Outbreak on a Spanish Mink Farm: Epidemiological, Molecular, and Pathological Studies
neovison vison	Transmission of SARS-CoV-2 from humans to animals and potential host adaptation
neovison vison	Analysis of SARS-CoV-2 Variants From 24,181 Patients Exemplifies the Role of Globalization and Zoonosis in Pandemics
neovison vison	Receptor-binding domain-based immunoassays for serosurveillance differentiate efficiently between SARS-CoV2-exposed and non-exposed farmed mink
neovison vison	Mathematical modelling of SARS-CoV-2 variant outbreaks reveals their probability of extinction
neovison vison	Spatial epidemiology and genetic diversity of SARS-CoV-2 and related coronaviruses in domestic and wild animals
neovison vison	Animal Transmission of SARS-CoV-2 and the Welfare of Animals during the COVID-19 Pandemic
neovison vison	SARS-CoV-2 pandemic and its threats to humans and animals
neovison vison	An outbreak of SARS-CoV-2 with high mortality in mink (Neovison vison) on multiple Utah farms
neovison vison	Mutation Y453F in the spike protein of SARS-CoV-2 enhances interaction with the mink ACE2 receptor for host adaption
neovison vison	Animal reservoirs of SARS-CoV-2: calculable COVID-19 risk for older adults from animal to human transmission
neovison vison	Evolution, Ecology, and Zoonotic Transmission of Betacoronaviruses: A Review
neovison vison	An Opportunistic Survey Reveals an Unexpected Coronavirus Diversity Hotspot in North America
neovison vison	Review: SARS-CoV-2 infection in farmed minks - an overview of current knowledge on occurrence, disease and epidemiology
neovison vison	First Description of SARS-CoV-2 Infection in Two Feral American Mink (Neovison vison) Caught in the Wild
neovison vison	SARS-CoV-2 (COVID-19): Zoonotic Origin and Susceptibility of Domestic and Wild Animals
neovison vison	Multi-species ELISA for the detection of antibodies against SARS-CoV-2 in animals
neovison vison	Evaluation of a real-time RT-PCR panel for detection of SARS-CoV-2 in bat guano
neovison vison	Interacting Proteins, Polymorphisms and the Susceptibility of Animals to SARS-CoV-2
nyctalus leisleri	Genomic Characterization of Severe Acute Respiratory Syndrome-Related Coronavirus in European Bats and Classification of Coronaviruses Based on Partial RNA-Dependent RNA Polymerase Gene Sequences	N
nyctalus noctula	Utilizing the VirIdAl Pipeline to Search for Viruses in the Metagenomic Data of Bat Samples	N
nyctalus noctula	Detection of Coronaviruses in Bats of Various Species in Italy	Y	none
nyctereutes procyonoides	Susceptibility of Raccoon Dogs for Experimental SARS-CoV-2 Infection	N
nyctereutes procyonoides	Viral, host and environmental factors that favor anthropozoonotic spillover of coronaviruses: An opinionated review, focusing on SARS-CoV, MERS-CoV and SARS-CoV-2	N
nyctereutes procyonoides	Molecular evolution analysis and geographic investigation of severe acute respiratory syndrome coronavirus-like virus in palm civets at an animal market and on farms	N
nycteris thebaica	Coronavirus antibodies in African bat species	Y	none
nyctinomops laticaudatus	Coronaviruses in bats from Mexico	Y	none
odocoileus virginianus	High Seroprevalence of SARS-CoV-2 in White-Tailed Deer (Odocoileus virginianus) at One of Three Captive Cervid Facilities in Texas
odocoileus virginianus	Transmission of SARS-CoV-2 from humans to animals and potential host adaptation
odocoileus virginianus	From Deer-to-Deer: SARS-CoV-2 is efficiently transmitted and presents broad tissue tropism and replication sites in white-tailed deer
odocoileus virginianus	SARS-CoV-2 infection in free-ranging white-tailed deer
odocoileus virginianus	Infection and transmission of ancestral SARS-CoV-2 and its alpha variant in pregnant white-tailed deer
odocoileus virginianus	Bovine-Like Coronaviruses Isolated from Four Species of Captive Wild Ruminants Are Homologous to Bovine Coronaviruses, Based on Complete Genomic Sequences
odocoileus virginianus	Screening of wild deer populations for exposure to SARS-CoV-2 in the United Kingdom, 2020-2021
odocoileus virginianus	Transmission history of SARS-CoV-2 in humans and white-tailed deer
oryctolagus cuniculus	Epidemiology and Genomic Characterization of Two Novel SARS-Related Coronaviruses in Horseshoe Bats from Guangdong, China	N
oryctolagus cuniculus	Lack of Middle East Respiratory Syndrome Coronavirus Transmission in Rabbits	N
ovis aries	Investigations on SARS-CoV-2 Susceptibility of Domestic and Wild Animals Using Primary Cell Culture Models Derived from the Upper and Lower Respiratory Tract	N
paguma larvata	Virome characterization of game animals in China reveals a spectrum of emerging pathogens	Y	none
paguma larvata	The SARS-CoV-2 outbreak from a one health perspective	N
paguma larvata	Molecular evolution and phylogenetic analysis of SARS-CoV-2 and hosts ACE2 protein suggest Malayan pangolin as intermediary host	N
paguma larvata	Viral, host and environmental factors that favor anthropozoonotic spillover of coronaviruses: An opinionated review, focusing on SARS-CoV, MERS-CoV and SARS-CoV-2	N
paguma larvata	Predicting the angiotensin converting enzyme 2 (ACE2) utilizing as the of SARS-CoV-2	N
paguma larvata	SARS coronavirus without reservoir originated from an unnatural evolution, experienced the reverse evolution, and finally disappeared in the world	NO ACCESS
paguma larvata	Molecular evolution analysis and geographic investigation of severe acute respiratory syndrome coronavirus-like virus in palm civets at an animal market and on farms	Y	none
paguma larvata	Animal coronaviruses: what can they teach us about the severe acute respiratory syndrome?	N
pan troglodytes	Molecular evolution and phylogenetic analysis of SARS-CoV-2 and hosts ACE2 protein suggest Malayan pangolin as intermediary host	N
panthera leo	The threat of the spread of SARS-CoV-2 variants in animals	N
panthera leo	From People to Panthera: Natural SARS-CoV-2 Infection in Tigers and Lions at the Bronx Zoo	N
panthera tigris	From People to Panthera: Natural SARS-CoV-2 Infection in Tigers and Lions at the Bronx Zoo	N
paradoxurus hermaphroditus	LEUCOCYTE COUNT, LEUCOCYTE DIFFERENTIATION, AND STRESS INDEX OF COMMON PALM CIVETS (PARADOXURUS HERMAPHRODITUS)., Profil Leukosit, Diferensial Leukosit, dan Indeks Stres Luwak Jawa (Paradoxurus hermaphroditus)	N
peromyscus leucopus	Epidemiology and Genomic Characterization of Two Novel SARS-Related Coronaviruses in Horseshoe Bats from Guangdong, China	N
peromyscus leucopus	SARS-CoV-2 infection and transmission in the North American deer mouse	N
peromyscus leucopus	Animal reservoirs of SARS-CoV-2: calculable COVID-19 risk for older adults from animal to human transmission	N
peromyscus maniculatus	SARS-CoV-2 infection and transmission in the North American deer mouse	N
peromyscus maniculatus	Peridomestic Mammal Susceptibility to Severe Acute Respiratory Syndrome Coronavirus 2 Infection	N
pipistrellus abramus	Viruses and Bats	N
pipistrellus abramus	Identification of a Novel Betacoronavirus (Merbecovirus) in Amur Hedgehogs from China	N
pipistrellus coromandra	Genetic diversity of coronaviruses in bats in Lao PDR and Cambodia	Y	potential maintenance
pipistrellus kuhlii	The SARS-CoV-2 outbreak from a one health perspective	N
pipistrellus kuhlii	Full genome characterization of two novel Alpha-coronavirus species from Italian bats	N
pipistrellus kuhlii	Detection of Coronaviruses in Bats of Various Species in Italy	Y	potential maintenance
pipistrellus nathusii	Utilizing the VirIdAl Pipeline to Search for Viruses in the Metagenomic Data of Bat Samples	N
pipistrellus pipistrellus	Full genome characterization of two novel Alpha-coronavirus species from Italian bats	N
pipistrellus pipistrellus	Discovery of Novel Bat Coronaviruses in South China That Use the Same Receptor as Middle East Respiratory Syndrome Coronavirus	Y	potential maintenance
pipistrellus pipistrellus	Tissue Distribution of the MERS-Coronavirus Receptor in Bats	N
pipistrellus pipistrellus	Alphacoronaviruses Detected in French Bats Are Phylogeographically Linked to Coronaviruses of European Bats	N
pipistrellus pygmaeus	Characterization of Pipistrellus pygmaeus Bat Virome from Sweden	N
pipistrellus pygmaeus	Alphacoronavirus in a Daubenton's Myotis Bat (Myotis daubentonii) in Sweden	N
ptenochirus jagori	First Molecular Evidence for Bat Betacoronavirus in Mindanao	Y	none
pteronotus davyi	Novel Bat Coronaviruses, Brazil and Mexico	Y	none
pteropus alecto	A Potent Postentry Restriction to Primate Lentiviruses in a Yinpterochiropteran Bat	N
pteropus alecto	Characterization of the Antigen Processing Machinery and Endogenous Peptide Presentation of a Bat MHC Class I Molecule	N
pteropus alecto	Molecular characterization of RIG-I, STAT-1 and IFN-beta in the horseshoe bat	N
pteropus alecto	Bats and bat-borne diseases: a perspective on Australian megabats	N
pteropus lylei	Longitudinal monitoring in Cambodia suggests higher circulation of alpha and betacoronaviruses in juvenile and immature bats of three species	Y	potential maintenance
pteropus lylei	Longitudinal study of age-specific pattern of coronavirus infection in Lyle's flying fox (Pteropus lylei) in Thailand	Y	potential maintenance
pteropus rufus	Full Genome Nobecovirus Sequences From Malagasy Fruit Bats Define a Unique Evolutionary History for This Coronavirus Clade	Y	potential maintenance
pteropus rufus	Detection of new genetic variants of Betacoronaviruses in Endemic Frugivorous Bats of Madagascar	Y	none
pteronotus davyi	SARS-CoV-2 surveillance in Norway rats (Rattus norvegicus) from Antwerp sewer system, Belgium	Y	none
rattus norvegicus	First Coronavirus Active Survey in Rodents From the Canary Islands	Y	none
rattus norvegicus	A Novel Potentially Recombinant Rodent Coronavirus with a Polybasic Cleavage Site in the Spike Protein	Y	none
rattus norvegicus	Detection of alpha- and betacoronaviruses in rodents from Yunnan, China	N
rattus norvegicus	Free-living animals as a source of zoonotic microorganisms	N
rattus norvegicus	Discovery, diversity and evolution of novel coronaviruses sampled from rodents in China	Y	none
rattus rattus	First Coronavirus Active Survey in Rodents From the Canary Islands	Y	none
rhinolophus affinis	Inferring the ecological niche of bat viruses closely related to SARS-CoV-2 using phylogeographic analyses of Rhinolophus species	N
rhinolophus affinis	The SARS-CoV-2 outbreak from a one health perspective	N
rhinolophus affinis	How related is SARS-CoV-2 to other coronaviruses?	N
rhinolophus affinis	The human coronaviruses (HCoVs) and the molecular mechanisms of SARS-CoV-2 infection	N
rhinolophus affinis	A Genomic Perspective on the Origin and Emergence of SARS-CoV-2	N
rhinolophus affinis	Identification of Diverse Bat Alphacoronaviruses and Betacoronaviruses in China Provides New Insights Into the Evolution and Origin of Coronavirus-Related Diseases	N
rhinolophus affinis	Global Epidemiology of Bat Coronaviruses	N
rhinolophus affinis	Coexistence of multiple coronaviruses in several bat colonies in an abandoned mineshaft	Y	none
rhinolophus affinis	Molecular characterization of RIG-I, STAT-1 and IFN-beta in the horseshoe bat	N
rhinolophus affinis	Variation in synonymous nucleotide composition among genomes of sarbecoviruses and consequences for the origin of COVID-19	N
rhinolophus affinis	Epidemiology and Genomic Characterization of Two Novel SARS-Related Coronaviruses in Horseshoe Bats from Guangdong, China	Y	potential maintenance
rhinolophus affinis	Isolation of a Novel Bat Rhabdovirus with Evidence of Human Exposure in China	N
rhinolophus affinis	Identification of a novel lineage bat SARS-related coronaviruses that use bat ACE2 receptor	Y	none
rhinolophus cornutus	Variation in synonymous nucleotide composition among genomes of sarbecoviruses and consequences for the origin of COVID-19	N
rhinolophus cornutus	Detection and Characterization of Bat Sarbecovirus Phylogenetically Related to SARS-CoV-2, Japan	Y	potential maintenance
rhinolophus euryale	Genomic determinants of Furin cleavage in diverse European SARS-related bat coronaviruses	Y	none
rhinolophus euryale	A Cross Sectional Sampling Reveals Novel Coronaviruses in Bat Populations of Georgia	Y	none
rhinolophus ferrumequinum	Molecular evolution and phylogenetic analysis of SARS-CoV-2 and hosts ACE2 protein suggest Malayan pangolin as intermediary host	N
rhinolophus ferrumequinum	Molecular epidemiology, evolution and phylogeny of SARS coronavirus	N
rhinolophus ferrumequinum	Complete genome analysis of a SARS-like bat coronavirus identified in the Republic of Korea	Y	none
rhinolophus ferrumequinum	Molecular identification of Betacoronavirus in bats from Sardinia (Italy): first detection and phylogeny	Y	none
rhinolophus ferrumequinum	Novel Alphacoronaviruses and Paramyxoviruses Cocirculate with Type 1 and Severe Acute Respiratory System (SARS)-Related Betacoronaviruses in Synanthropic Bats of Luxembourg	Y	none
rhinolophus ferrumequinum	Novel coronaviruses, astroviruses, adenoviruses and circoviruses in insectivorous bats from northern China	Y	none
rhinolophus ferrumequinum	Severe Acute Respiratory Syndrome (SARS) Coronavirus ORF8 Protein Is Acquired from SARS-Related Coronavirus from Greater Horseshoe Bats through Recombination	Y	none
rhinolophus ferrumequinum	Detection of a virus related to betacoronaviruses in Italian greater horseshoe bats	Y	potential maintenance
rhinolophus ferrumequinum	Full-length genome sequences of two SARS-like coronaviruses in horseshoe bats and genetic variation analysis	N
rhinolophus ferrumequinum	Variation in synonymous nucleotide composition among genomes of sarbecoviruses and consequences for the origin of COVID-19	N
rhinolophus ferrumequinum	Genomic determinants of Furin cleavage in diverse European SARS-related bat coronaviruses	Y	none
rhinolophus ferrumequinum	A Cross Sectional Sampling Reveals Novel Coronaviruses in Bat Populations of Georgia	Y	none
rhinolophus ferrumequinum	SARS-like Coronaviruses in Horseshoe Bats (Rhinolophus spp.) in Russia, 2020	Y	potential maintenance
rhinolophus ferrumequinum	New putative animal reservoirs of SARS-CoV-2 in Italian fauna: A bioinformatic approach	N
rhinolophus ferrumequinum	Long-term surveillance of bat coronaviruses in Korea: Diversity and distribution pattern	Y	none
rhinolophus hipposideros	The Genetic Characterization of the First Detected Bat Coronaviruses in Poland Revealed SARS-Related Types and Alphacoronaviruses	Y	potential maintenance
rhinolophus hipposideros	Genomic determinants of Furin cleavage in diverse European SARS-related bat coronaviruses	Y	none
rhinolophus hipposideros	SARS-like Coronaviruses in Horseshoe Bats (Rhinolophus spp.) in Russia, 2020	Y	none
rhinolophus hipposideros	Detection of Coronaviruses in Bats of Various Species in Italy	Y	none
rhinolophus macrotis	Variation in synonymous nucleotide composition among genomes of sarbecoviruses and consequences for the origin of COVID-19	N
rhinolophus macrotis	Molecular evolution and phylogenetic analysis of SARS-CoV-2 and hosts ACE2 protein suggest Malayan pangolin as intermediary host	N
rhinolophus macrotis	Full-length genome sequences of two SARS-like coronaviruses in horseshoe bats and genetic variation analysis	N
rhinolophus malayanus	Longitudinal monitoring in Cambodia suggests higher circulation of alpha and betacoronaviruses in juvenile and immature bats of three species	Y	none
rhinolophus malayanus	Inferring the ecological niche of bat viruses closely related to SARS-CoV-2 using phylogeographic analyses of Rhinolophus species	N
rhinolophus monoceros	Detection of the Severe Acute Respiratory Syndrome-Related Coronavirus and Alphacoronavirus in the Bat Population of Taiwan	Y	potential maintenance
rhinolophus pearsonii	Full-length genome sequences of two SARS-like coronaviruses in horseshoe bats and genetic variation analysis	N
rhinolophus pusillus	Variation in synonymous nucleotide composition among genomes of sarbecoviruses and consequences for the origin of COVID-19	N
rhinolophus pusillus	Novel coronaviruses, astroviruses, adenoviruses and circoviruses in insectivorous bats from northern China	Y	none
rhinolophus sinicus	Isolation and Characterization of a Novel Bat Coronavirus Closely Related to the Direct Progenitor of Severe Acute Respiratory Syndrome Coronavirus	Y	none
rhinolophus sinicus	Coexistence of multiple coronaviruses in several bat colonies in an abandoned mineshaft	Y	none
rhinolophus sinicus	Severe Acute Respiratory Syndrome (SARS) Coronavirus ORF8 Protein Is Acquired from SARS-Related Coronavirus from Greater Horseshoe Bats through Recombination	N
rhinolophus sinicus	Molecular characterization of RIG-I, STAT-1 and IFN-beta in the horseshoe bat	N
rhinolophus sinicus	SARS coronavirus without reservoir originated from an unnatural evolution, experienced the reverse evolution, and finally disappeared in the world	N
rhinolophus sinicus	Close Relative of Human Middle East Respiratory Syndrome Coronavirus in Bat, South Africa	N
rhinolophus sinicus	Angiotensin-converting enzyme 2 (ACE2) proteins of different bat species confer variable susceptibility to SARS-CoV entry	N
rhinolophus sinicus	Evolution of genomes, host shifts and the geographic spread of SARS-CoV and related coronaviruses	N
rhinolophus sinicus	Full-length genome sequences of two SARS-like coronaviruses in horseshoe bats and genetic variation analysis	N
rhinolophus sinicus	Differential Tropism of SARS-CoV and SARS-CoV-2 in Bat Cells	N
rhinolophus sinicus	In silico studies on the comparative characterization of the interactions of SARS-CoV-2 spike glycoprotein with ACE-2 receptor homologs and human TLRs	N
rhinolophus sinicus	Evolutionary Arms Race between Virus and Host Drives Genetic Diversity in Bat Severe Acute Respiratory Syndrome-Related Coronavirus Spike Genes	N
rhinolophus sinicus	Functional assessment of cell entry and receptor usage for SARS-CoV-2 and other lineage B betacoronaviruses	N
rhinolophus sinicus	Cross-species transmission of the newly identified coronavirus 2019-nCoV	N
rhinolophus sinicus	Predicting the angiotensin converting enzyme 2 (ACE2) utilizing as the of SARS-CoV-2	N
rhinolophus sinicus	Molecular epidemiology, evolution and phylogeny of SARS coronavirus	N
rhinolophus sinicus	Novel Bat Alphacoronaviruses in Southern China Support Chinese Horseshoe Bats as an Important Reservoir for Potential Novel Coronaviruses	N
rhinolophus sinicus	Global Epidemiology of Bat Coronaviruses	N
rhinolophus sinicus	Variation in synonymous nucleotide composition among genomes of sarbecoviruses and consequences for the origin of COVID-19	N
rhinolophus sinicus	Systematic Tracing of Susceptible Animals to SARS-CoV-2 by a Bioinformatics Framework	N
rhinolophus sinicus	A Look inside the Replication Dynamics of SARS-CoV-2 in Blyth's Horseshoe Bat (Rhinolophus lepidus) Kidney Cells	N
rhinolophus sinicus	The threat of the spread of SARS-CoV-2 variants in animals	N
rhinolophus sinicus	Epidemiology and Genomic Characterization of Two Novel SARS-Related Coronaviruses in Horseshoe Bats from Guangdong, China	Y	potential maintenance
rhinolophus sinicus	Molecular evolution and phylogenetic analysis of SARS-CoV-2 and hosts ACE2 protein suggest Malayan pangolin as intermediary host	N
rhinolophus stheno	Variation in synonymous nucleotide composition among genomes of sarbecoviruses and consequences for the origin of COVID-19	N
rhinolophus thomasi	Isolation of a Novel Bat Rhabdovirus with Evidence of Human Exposure in China	N
rhinopoma hardwickii	Coronavirus and Paramyxovirus Shedding by Bats in a Cave and Buildings in Ethiopia	Y	potential maintenance
rousettus aegyptiacus	No evidence of SARS-CoV-2 infection in Rousettus aegyptiacus bat in Egypt	Y	none
rousettus aegyptiacus	Coronaviruses in humans and animals: the role of bats in viral evolution	N
rousettus aegyptiacus	Coronaviruses Detected in Bats in Close Contact with Humans in Rwanda	Y	potential maintenance
rousettus aegyptiacus	Tissue Distribution of the MERS-Coronavirus Receptor in Bats	N
rousettus aegyptiacus	BATS: CARRIERS OF ZOONOTIC VIRAL AND EMERGING INFECTIOUS DISEASES	NO ACCESS
rousettus aegyptiacus	Detection of Novel SARS-like and Other Coronaviruses in Bats from Kenya	Y	none
rousettus aegyptiacus	Coronavirus antibodies in African bat species	Y	potential maintenance
rousettus amplexicaudatus	Molecular detection of bat coronaviruses in three bat species in Indonesia	Y	potential maintenance
rousettus amplexicaudatus	First Molecular Evidence for Bat Betacoronavirus in Mindanao.	Y	none
rousettus leschenaultii	Presence of Recombinant Bat Coronavirus GCCDC1 in Cambodian Bats	N
rousettus leschenaultii	Establishment of Intestinal Organoid from Rousettus leschenaultii and the Susceptibility to Bat-Associated Viruses, SARS-CoV-2 and Pteropine Orthoreovirus	N
rousettus leschenaultii	Detection of Alpha- and Betacoronaviruses in Miniopterus fuliginosus and Rousettus leschenaultii, two species of Sri Lankan Bats	N
scotophilus dinganii	Metagenomic Analysis Reveals Previously Undescribed Bat Coronavirus Strains in Eswatini	Y	none
scotophilus kuhlii	Identification of Diverse Bat Alphacoronaviruses and Betacoronaviruses in China Provides New Insights Into the Evolution and Origin of Coronavirus-Related Diseases	Y	none
scotophilus kuhlii	Detection of the Severe Acute Respiratory Syndrome-Related Coronavirus and Alphacoronavirus in the Bat Population of Taiwan	Y	none
scotophilus kuhlii	DETECTION OF BAT CORONAVIRUS AND SPECIFIC ANTIBODIES IN CHESTNUT BAT (SCOTOPHILUS KUHLII) POPULATION IN CENTRAL TAIWAN	N
suncus murinus	Discovery of a Highly Divergent Coronavirus in the Asian House Shrew from China Illuminates the Origin of the Alphacoronaviruses	N
sus scrofa	Influenza D virus infection in cattle in Italy	N
sus scrofa	Domestic Pig Unlikely Reservoir for MERS-CoV	N
sus scrofa	Livestock Susceptibility to Infection with Middle East Respiratory Syndrome Coronavirus	N
sus scrofa	Generation and Characterization of Eptesicus fuscus (Big brown bat) kidney cell lines immortalized using the Myotis polyomavirus large T-antigen	N
sus scrofa	Detection of Severe Acute Respiratory Syndrome-Like, Middle East Respiratory Syndrome-Like Bat Coronaviruses and Group H Rotavirus in Faeces of Korean Bats	N
sus scrofa	Hepatitis E: A disease of reemerging importance	N
sus scrofa	Bats as reservoirs of severe emerging infectious diseases	N
sus scrofa	Evolution of genomes, host shifts and the geographic spread of SARS-CoV and related coronaviruses	N
sus scrofa	Porcine innate and adaptative immune responses to influenza and coronavirus infections	N
sus scrofa	Transmission dynamics and susceptibility patterns of SARS-CoV-2 in domestic, farmed and wild animals: Sustainable One Health surveillance for conservation and public health to prevent future epidemics and pandemics	N
sus scrofa	Comprehensive Subcellular Localization of Swine Acute Diarrhea Syndrome Coronavirus Proteins	N
sus scrofa	Swine coronaviruses (SCoVs) and their emerging threats to swine population, inter-species transmission, exploring the susceptibility of pigs for SARS-CoV-2 and zoonotic concerns	N
sus scrofa	Investigations on SARS-CoV-2 Susceptibility of Domestic and Wild Animals Using Primary Cell Culture Models Derived from the Upper and Lower Respiratory Tract	N
sus scrofa	Development of an in vitro model for animal species susceptibility to SARS-CoV-2 replication based on expression of ACE2 and TMPRSS2 in avian cells	N
sus scrofa	Independent infections of porcine deltacoronavirus among Haitian children	N
sus scrofa	Three-Week Old Pigs Are Not Susceptible to Productive Infection with SARS-COV-2	N
sus scrofa	Experimental and field investigations of exposure, replication and transmission of SARS-CoV-2 in pigs in the Netherlands	Y	none
sus scrofa	An alphavirus replicon-based vaccine expressing a stabilized Spike antigen induces protective immunity and prevents transmission of SARS-CoV-2 between cats	N
sus scrofa	Interspecies Jumping of Bat Coronaviruses	N
sus scrofa	Evolutionary Dynamics and Epidemiology of Endemic and Emerging Coronaviruses in Humans, Domestic Animals, and Wildlife	N
sus scrofa	Viruses from poultry and livestock pose continuous threats to human beings	N
sus scrofa	Naturally Occurring Animal Coronaviruses as Models for Studying Highly Pathogenic Human Coronaviral Disease	N
sus scrofa	How related is SARS-CoV-2 to other coronaviruses?	N
sus scrofa	The Coronaviruses of Animals and Birds: Their Zoonosis, Vaccines, and Models for SARS-CoV and SARS-CoV2	N
sus scrofa	Susceptibility of Domestic Swine to Experimental Infection with Severe Acute Respiratory Syndrome Coronavirus 2	N
sus scrofa	Susceptibility of swine cells and domestic pigs to SARS-CoV-2	N
sus scrofa	CORONAVIRUS INFECTIONS: A BRIEF REVIEW	N
sus scrofa	Predicting the angiotensin converting enzyme 2 (ACE2) utilizing as the of SARS-CoV-2	N
sus scrofa	Bats and Coronaviruses	N
sus scrofa	Identification of Diverse Bat Alphacoronaviruses and Betacoronaviruses in China Provides New Insights Into the Evolution and Origin of Coronavirus-Related Diseases	N
sus scrofa	Species-Specific Colocalization of Middle East Respiratory Syndrome Coronavirus Attachment and Entry Receptors	N
sus scrofa	Origin and evolution of pathogenic coronaviruses	N
sus scrofa	Cameroonian fruit bats harbor divergent viruses, including rotavirus H, bastroviruses, and picobirnaviruses using an alternative genetic code	N
sus scrofa	Longitudinal study of age-specific pattern of coronavirus infection in Lyle's flying fox (Pteropus lylei) in Thailand	N
sus scrofa	Hosts and Sources of Endemic Human Coronaviruses	N
sus scrofa	Middle East respiratory syndrome coronavirus experimental transmission using a pig model	N
sus scrofa	Influenza D virus infection in cattle in Italy	N
sus scrofa	Domestic Pig Unlikely Reservoir for MERS-CoV	N
sus scrofa	Livestock Susceptibility to Infection with Middle East Respiratory Syndrome Coronavirus	N
sus scrofa	Generation and Characterization of Eptesicus fuscus (Big brown bat) kidney cell lines immortalized using the Myotis polyomavirus large T-antigen	N
sus scrofa	Detection of Severe Acute Respiratory Syndrome-Like, Middle East Respiratory Syndrome-Like Bat Coronaviruses and Group H Rotavirus in Faeces of Korean Bats	N
sus scrofa	Hepatitis E: A disease of reemerging importance	N
sus scrofa	Bats as reservoirs of severe emerging infectious diseases	N
sus scrofa	Evolution of genomes, host shifts and the geographic spread of SARS-CoV and related coronaviruses	N
tadarida brasiliensis	Experimental Infection of Brazilian Free-Tailed Bats (Tadarida brasiliensis) with Two Strains of SARS-CoV-2	N
tadarida brasiliensis	Generation and Characterization of Eptesicus fuscus (Big brown bat) kidney cell lines immortalized using the Myotis polyomavirus large T-antigen	N
taphozous perforatus	Middle East respiratory syndrome (MERS): bats or dromedary, which of them is responsible?, Le 'syndrome respiratoire du Moyen-Orient' (MERS) : qui est responsable, les chauves-souris ou le dromadaire ?	N
tragelaphus angasii	Investigations on SARS-CoV-2 Susceptibility of Domestic and Wild Animals Using Primary Cell Culture Models Derived from the Upper and Lower Respiratory Tract	N
tragelaphus angasii	Detection and characterization of bovine-like coronaviruses from four species of zoo ruminants	N
tragelaphus spekii	Detection and characterization of bovine-like coronaviruses from four species of zoo ruminants	N
tylonycteris pachypus	Viruses and Bats	N
tylonycteris pachypus	Discovery of Novel Bat Coronaviruses in South China That Use the Same Receptor as Middle East Respiratory Syndrome Coronavirus	Y	none
vespertilio murinus	Virus Diversity, Abundance, and Evolution in Three Different Bat Colonies in Switzerland	Y	potential maintenance
vicugna pacos	Investigations on SARS-CoV-2 Susceptibility of Domestic and Wild Animals Using Primary Cell Culture Models Derived from the Upper and Lower Respiratory Tract	N
vicugna pacos	Enhanced replication fitness of MERS-CoV clade B over clade A strains in camelids explains the dominance of clade B strains in the Arabian Peninsula	N
vicugna pacos	Zoonotic origins of human coronavirus 2019 (HCoV-19/SARS-CoV-2): why is this work important?	N
vicugna pacos	Efficacy of an Adjuvanted Middle East Respiratory Syndrome Coronavirus Spike Protein Vaccine in Dromedary Camels and Alpacas	N
vicugna pacos	Livestock Susceptibility to Infection with Middle East Respiratory Syndrome Coronavirus	N
vicugna pacos	MERS-CoV Infection of Alpaca in a Region Where MERS-CoV is Endemic	Y	none

## Sheet: Mammarenavirus
Sp.	Publication	Field study	Reservoir evidence	Notes
Bandicota indica	Molecular detection and genetic characterization of Wenzhou virus in rodents in Guangzhou, China	Y	none
Calomys musculinus	Co-circulation of Junín virus and other mammarenaviruses in a geographical area without confirmed cases of Argentine Hemorrhagic Fever	Y	potential maintenance	we demonstrated Junin virus circulation in its rodent reservoir in a region considered historic for AHF with potential risk for the population and the spatio-temporal co-circulation of the three mammarenaviruses in the central region of Argentina
Hylomyscus pamfi	Co-infection of mammarenaviruses in a wild mouse, Tanzania	N
Lemniscomys striatus	Co-infection of mammarenaviruses in a wild mouse, Tanzania	Y	none
Lemniscomys rosalia	First investigation of pathogenic bacteria, protozoa and viruses in rodents and shrews in context of forest-savannah-urban areas interface in the city of Franceville (Gabon)	Y	none
Mastomys erythroleucus	Rodents of Choke Mountain and surrounding areas (Ethiopia): the Blue Nile gorge as a strong biogeographic barrier	Y	none
Mastomys awashensis	Rodents of Choke Mountain and surrounding areas (Ethiopia): the Blue Nile gorge as a strong biogeographic barrier	Y	none
Mastomys erythroleucus	Serological Survey of Zoonotic Viruses in Invasive and Native Commensal Rodents in Senegal, West Africa	Y	none
Mastomys natalensis	Detection and genetic diversity of Mopeia virus in Mastomys natalensis from different habitats in the Limpopo National Park, Mozambique	Y	potential maintenance	Here we reported that Mopeia virus circulates in M. natalensis rodents
Mastomys natalensis	Determining Ancestry between Rodent- and Human-Derived Virus Sequences in Endemic Foci: Towards a More Integral Molecular Epidemiology of Lassa Fever within West Africa	N
Mastomys natalensis	Multiple Mammarenaviruses Circulating in Angolan Rodents	Y	none
Mastomys natalensis	Lassa Virus Isolation from Mastomys natalensis Rodents during an Epidemic in Sierra Leone	Y	potential maintenance	itseemsmorelikelythattheprimaryepidemio-logicaleventwasarodentenzooticorepizootic.
Micaelamys namaquensis	Multiple Mammarenaviruses Circulating in Angolan Rodents	Y	none
Mus musculus	Potentially Zoonotic Viruses in Wild Rodents, United Arab Emirates, 2019—A Pilot Study	Y	none
Mus musculus	New Perspective on the Geographic Distribution and Evolution of Lymphocytic Choriomeningitis Virus, Central Europe	Y	potential maintenance
Mus musculus	Co-circulation of Junín virus and other mammarenaviruses in a geographical area without confirmed cases of Argentine Hemorrhagic Fever	NO ACCESS		we demonstrated Junin virus circulation in its rodent reservoir in a region considered historic for AHF with potential risk for the population and the spatio-temporal co-circulation of the three mammarenaviruses in the central region of Argentina
Mus musculus	Serological Survey of Zoonotic Viruses in Invasive and Native Commensal Rodents in Senegal, West Africa	Y	none
Rattus flavipectus	Molecular detection and genetic characterization of Wenzhou virus in rodents in Guangzhou, China	Y	none
Rattus norvegicus	Molecular detection and genetic characterization of Wenzhou virus in rodents in Guangzhou, China	Y	none
Rattus norvegicus	Serological Evidence of Multiple Zoonotic Viral Infections among Wild Rodents in Barbados	Y	none
Rattus norvegicus	Virome profiling of rodents in Xinjiang Uygur Autonomous Region, China: Isolation and characterization of a new strain of Wenzhou virus	Y	none	These observations have expanded the geographic distribution of WENV to Central Asia, and further confirm that brown rats are natural hosts of Wenzhou virus.
Rattus norvegicus	Prevalence of Wēnzhōu virus in small mammals in Yunnan Province, China	Y	potential maintenance
Rattus norvegicus	Complete Genome Sequence of a Mammarenavirus Harbored by Rodents on Hainan Island, China	Y	none
Rattus norvegicus	Serological Survey of Zoonotic Viruses in Invasive and Native Commensal Rodents in Senegal, West Africa	Y	none
Rattus tanezumi	Prevalence of Wēnzhōu virus in small mammals in Yunnan Province, China	Y	none
Peromyscus californicus	Bear Canyon Virus: An Arenavirus Naturally Associated with the California Mouse (Peromyscus californicus)	Y	potential maintenance
Calomys callosus	Co-circulation of Clade C New World Arenaviruses: New geographic distribution and host species	Y	potential maintenance

## Sheet: Orthonairovirus
Sp.	Publication	Field study	Reservoir evidence	Notes
Rousettus aegyptiacus	doi.org/10.1038/s41598-022-24673-w	N	none	evidence suggests that KASV is maintained in an enzootic transmission cycle between O. (R.) faini ticks and Egyptian fruit bats
Rousettus aegyptiacus	doi.org/10.4269/ajtmh.1986.35.387	Y	none

## Sheet: Flavivirus
Sp.	Publication	Field study	Reservoir evidence	Notes
Apodemus flavicollis	Seroprevalence of Tick-Borne Encephalitis (TBE) Virus Antibodies in Wild Rodents from Two Natural TBE Foci in Bavaria, Germany	Y	none	in Europe reservoir hosts are primarily small rodents such as Apodemus spp. and Myodes spp.
Apodemus flavicollis	Seroprevalence of Tick-Borne Encephalitis (TBE) Virus Antibodies in Wild Rodents from Two Natural TBE Foci in Bavaria, Germany	Y	potential maintenance	This was regardless of the detection of seroconversions across seasons and between years. This confirms the presence of TBEV at suspected sites in reservoir hosts and the possibility of TBEV infection in rodents throughout the year.
Apodemus flavicollis	A 4-Year Study of a Natural Tick-Borne Encephalitis Virus Focus in Hungary, 2010–2013	Y	potential maintenance
Apodemus flavicollis	Epidemiology and ecology of tick-borne encephalitis in the eastern part of Germany between 1960 and 1990 and studies on the dynamics of a natural focus of tick-borne encephalitis	Y	potential maintenance
Cynopterus brachyotis	Robust dengue virus infection in bat cells and limited innate immune responses coupled with positive serology from bats in IndoMalaya and Australasia	Y	none
Eonycteris spelaea	Robust dengue virus infection in bat cells and limited innate immune responses coupled with positive serology from bats in IndoMalaya and Australasia	Y	none
Erythrocebus patas	Yellow fever in Senegal from 1976 to 1980	Y	none
Myodes glareolus	Detection of tick-borne encephalitis virus in ear tissue and dried blood spots from naturally infected wild rodents	Y	none
Clethrionomys rutilus	Vertical transmission of tick-borne encephalitis virus between generations of adapted reservoir small rodents	Y	potential maintenance
Rattus rattus	Usutu Virus Isolated from Rodents in Senegal	Y	none
Apodemus agrarius	A 4-Year Study of a Natural Tick-Borne Encephalitis Virus Focus in Hungary, 2010–2013	Y	potential maintenance
Artibeus jamaicensis	West Nile and Zika viruses in bats from a suburban area of Merida, Yucatan, Mexico	Y	none
Artibeus jamaicensis	Serological evidence of widespread exposure of Grenada fruit bats to chikungunya virus	Y	none
Arvicola amphibius	Siberian subtype tick-borne encephalitis virus in Ixodes ricinus in a newly emerged focus, Finland	Y	none
Bison bonasus	The European bison (Bison bonasus) as an indicatory species for the circulation of tick-borne encephalitis virus (TBEV) in natural foci in Poland	Y	potential maintenance	The findings also indicate high seroprevalence in some of the studied animals, especially in the free ranging populations. This probably corresponds to the high tick burden in this species and may indirectly promote the maintenance of this virus in the sylvatic environment that is inhabited by this species.
Cercopithecus ascanius	Yellow fever and Zika virus epizootics and enzootics in Uganda	Y	potential maintenance
Epomophorus labiatus	Neutralizing antibodies against flaviviruses, Babanki virus, and Rift Valley fever virus in Ugandan bats	Y	none
Erinaceus europaeus	Confirmation of Tick-borne encephalitis virus in an European hedgehog (Erinaceus europaeus)	Y	none	the simultaneous detection of antibodies and virus RNA in the same animal makes the European hedgehog a competent host of the tick-borne encephalitis virus and leads to the assumption that this species can act as a reservoir
Erinaceus roumanicus	https://www.cabdirect.org/cabdirect/abstract/19642701900	N	none	The ability of these species to maintain virus in this way indicates that they could act as reservoirs of TE virus in nature.
Glis glis	https://www.cabdirect.org/cabdirect/abstract/19642701900	N	none	The ability of these species to maintain virus in this way indicates that they could act as reservoirs of TE virus in nature.
Lepus americanus	POWASSAN VIRUS INFECTION IN SNOWSHOE HARES (Lepus americanus)	Y	none	This indicates that POW transmission occurred in at least 4 of the 5 years of this study.
Macaca nemestrina	Dengue, Japanese encephalitis and Chikungunya virus antibody prevalence among captive monkey (Macaca nemestrina) colonies of Northern Thailand	Y	none	captive animals
Macaca sinica	Seroepidemiology of dengue and other arboviruses in a natural population of toque macaques (Macaca sinica) at Polonnaruwa, Sri Lanka	Y	none
Myodes glareolus	Detection of tick-borne encephalitis virus in ear tissue and dried blood spots from naturally infected wild rodents	Y	potential maintenance
Myodes glareolus	A 4-Year Study of a Natural Tick-Borne Encephalitis Virus Focus in Hungary, 2010–2013	Y	potential maintenance
Myodes glareolus	Investigation of a Natural Focus of Encephalitis in the "Puszcza Bialowieska" National Park	Y	potential maintenance
Myodes rutilus	Tick-Borne Encephalitis Virus Diversity in Ixodid Ticks and Small Mammals in South-Western Siberia, Russia	Y	potential maintenance	The most important reservoir hosts of TBEV were M. rutilus, S. betulina, and S. araneus.
Myodes rutilus	Tick-Borne Encephalitis Virus Diversity in Ixodid Ticks and Small Mammals in South-Western Siberia, Russia	Y	potential maintenance	The most important reservoir hosts of TBEV were M. rutilus, S. betulina, and S. araneus.
Sorex araneus	Tick-Borne Encephalitis Virus Diversity in Ixodid Ticks and Small Mammals in South-Western Siberia, Russia	Y	potential maintenance	The most important reservoir hosts of TBEV were M. rutilus, S. betulina, and S. araneus.
Sorex betulina	Tick-Borne Encephalitis Virus Diversity in Ixodid Ticks and Small Mammals in South-Western Siberia, Russia	Y	potential maintenance	The most important reservoir hosts of TBEV were M. rutilus, S. betulina, and S. araneus.
Nasua nasua	Seroprevalence of arboviruses in Nasua nasua (Mammalia, Carnivora, Procyonidae) of synanthropic habitats in the Iguaçu National Park, Brazilian Atlantic Forest	Y	none	The presence of viral antibodies in coatis from INP indicate diversity, distribution and an apparent silent circulation of arbovirus of the genera Flavivirus, Alphavirus, Orthobunyavirus, and Phlebovirus, suggesting N. nasua to be a possible amplifying host of these arbovirus in the studied area.
Ondatra zibethicus	The Omsk hemorrhagic fever: research results (1946-2013)	Y	none

## Sheet: Phlebovirus
Sp.	Publication	Field study	Reservoir evidence	Notes
Syncerus caffer	Rift Valley Fever Virus Infection in African Buffalo (Syncerus caffer) Herds in Rural South Africa: Evidence of Interepidemic Transmission	Y
Acomys cahirinus	The Rift Valley fever epizootic in Egypt 1977-78. 2. Ecological and entomological studies	Y	none
Aepyceros melampus	Neutralizing antibodies against Rift Valley fever virus in wild antelope in far northern KwaZulu-Natal, South Africa, indicate recent virus circulation	Y	none
Arvicanthis niloticus	The potential role of rodents in the enzootic cycle of Rift Valley fever virus in Senegal	Y	potential maintenance	supporting the idea that A. niloticus and M. erythroleucus may play a role in the sylvatic maintenance cycle of RVFV; It is thus quite possible that A. niloticus and M. erythroleucus could serve as potential intermediate amplifying hosts during these periods of immunity that follow an epizootic, thus playing a crucial role in the maintenance of the virus during the interepizootic period of the na…
Mastomys erythroleucus	The potential role of rodents in the enzootic cycle of Rift Valley fever virus in Senegal	Y	potential maintenance	supporting the idea that A. niloticus and M. erythroleucus may play a role in the sylvatic maintenance cycle of RVFV; It is thus quite possible that A. niloticus and M. erythroleucus could serve as potential intermediate amplifying hosts during these periods of immunity that follow an epizootic, thus playing a crucial role in the maintenance of the virus during the interepizootic period of the na…
Bos taurus	SFTS Virus in Ticks in an Endemic Area of China	Y	none
Bos taurus	Preliminary survey of domestic animals of the Sudan for precipitating antibodies to Rift Valley fever virus	Y
Camelus dromedrius	Preliminary survey of domestic animals of the Sudan for precipitating antibodies to Rift Valley fever virus	Y
Canis lupus (dog)	Potential Animal Reservoirs of Toscana Virus and Coinfections with Leishmania infantum in Turkey	Y	potential maintenance	Temporal analysis of viremic samples suggested a continuous virus transmission occurring from June to September, which is also supported by the neutralizing antibody detection rates; canine species can be suggested as candidate reservoir hosts of TOSV, due to the high frequency of detectable RNA and neutralizing antibodies observed throughout the sandfly season.
Chlorocebus aethiops	Rift Valley Fever: The role of the vervet monkey as a reservoir or maintenance host for this virus	Y	none
Diceros bicornis	Mechanisms of inter-epidemic maintenance of Rift Valley fever phlebovirus	N
Felis catus	Molecular detection and phylogenetic analysis of severe fever with thrombocytopenia syndrome virus in shelter dogs and cats in the Republic of Korea	Y	none
Felis catus	Detection of Tick-Borne Pathogens in Ticks from Dogs and Cats in the Yamagata Prefecture of Japan in 2018	no access
Giraffa camelopardalis	Mechanisms of inter-epidemic maintenance of Rift Valley fever phlebovirus	N
Loxodonta african	Mechanisms of inter-epidemic maintenance of Rift Valley fever phlebovirus	N
Mastomys huberti	The potential role of rodents in the enzootic cycle of Rift Valley fever virus in Senegal	Y	none
Micaelamys namaquensis	Rift Valley fever virus: a seroepidemiologic study of small terrestrial vertebrates in South Africa	Y	potential maintenance	These results suggest a role for A. namaquensis as a cryptic carrier for RVF virus during interepizootic periods and support the results of other studies suggesting an amplifying role for heavy rainfall in the circulation of RVF virus.
Mus musculus	Prevalence and Molecular Phylogenetic Analysis of Severe Fever with Thrombocytopenia Syndrome Virus in Domestic Animals and Rodents in Hubei Province, China	Y	none
Miniopterus schreibersii	Seroprevalence of Toscana Virus and Sandfly Fever Sicilian Virus in European Bat Colonies Measured Using a Neutralization Test	Y	none
Myotis myotis	Seroprevalence of Toscana Virus and Sandfly Fever Sicilian Virus in European Bat Colonies Measured Using a Neutralization Test	Y	none
Tadarida teniotis	Seroprevalence of Toscana Virus and Sandfly Fever Sicilian Virus in European Bat Colonies Measured Using a Neutralization Test	Y	none
Eptesicus serotinus	Seroprevalence of Toscana Virus and Sandfly Fever Sicilian Virus in European Bat Colonies Measured Using a Neutralization Test	Y	none
Erinaceus amurensis	Hedgehogs as Amplifying Hosts of Severe Fever with Thrombocytopenia Syndrome Virus, China	Y	potential maintenance	hedgehogs can maintain the natural circulation of SFTSV in rural areas.
Atelerix albiventris	Hedgehogs as Amplifying Hosts of Severe Fever with Thrombocytopenia Syndrome Virus, China	Y	potential maintenance	hedgehogs can maintain the natural circulation of SFTSV in rural areas.
Rattus rattus	The potential role of rodents in the enzootic cycle of Rift Valley fever virus in Senegal	Y	none
Rattus norvegicus	The potential role of rodents in the enzootic cycle of Rift Valley fever virus in Senegal	Y	none
Rousettus leschenaultii	Malsoor Virus, a Novel Bat Phlebovirus, Is Closely Related to Severe Fever with Thrombocytopenia Syndrome Virus and Heartland Virus	Y	potential maintenance
