# Supplementary material
Source: Research Square preprint supplement (doi:10.21203/rs.3.rs-7076613/v1)
Supplement: Supplementary file 2 [file 497d9a0578a6ea0a2c183285.docx]

**Supplementary Information**

Rethinking global hotspots of high-priority viral zoonoses to guide spillover risk monitoring

Andrea Tonelli1* <andrea.tonelli@uniroma1.it>, Moreno Di Marco1<moreno.dimarco@uniroma1.it>

Index:

Supplementary Figure 1...………………………...….……………….………………………………...2

Supplementary Figure 2...………………………...….……………….………………………………...3

Supplementary Figure 3...………………………...….……………….………………………………...4

Supplementary Figure 4...………………………...….……………….………………………………...5

Supplementary Table 1...…………………….…...….……………….………………………………...6

Supplementary Table 2....………………………...….……………….………………………………...7

Supplementary Dataset 1 and Supplementary Dataset 2 are provided as separate files.


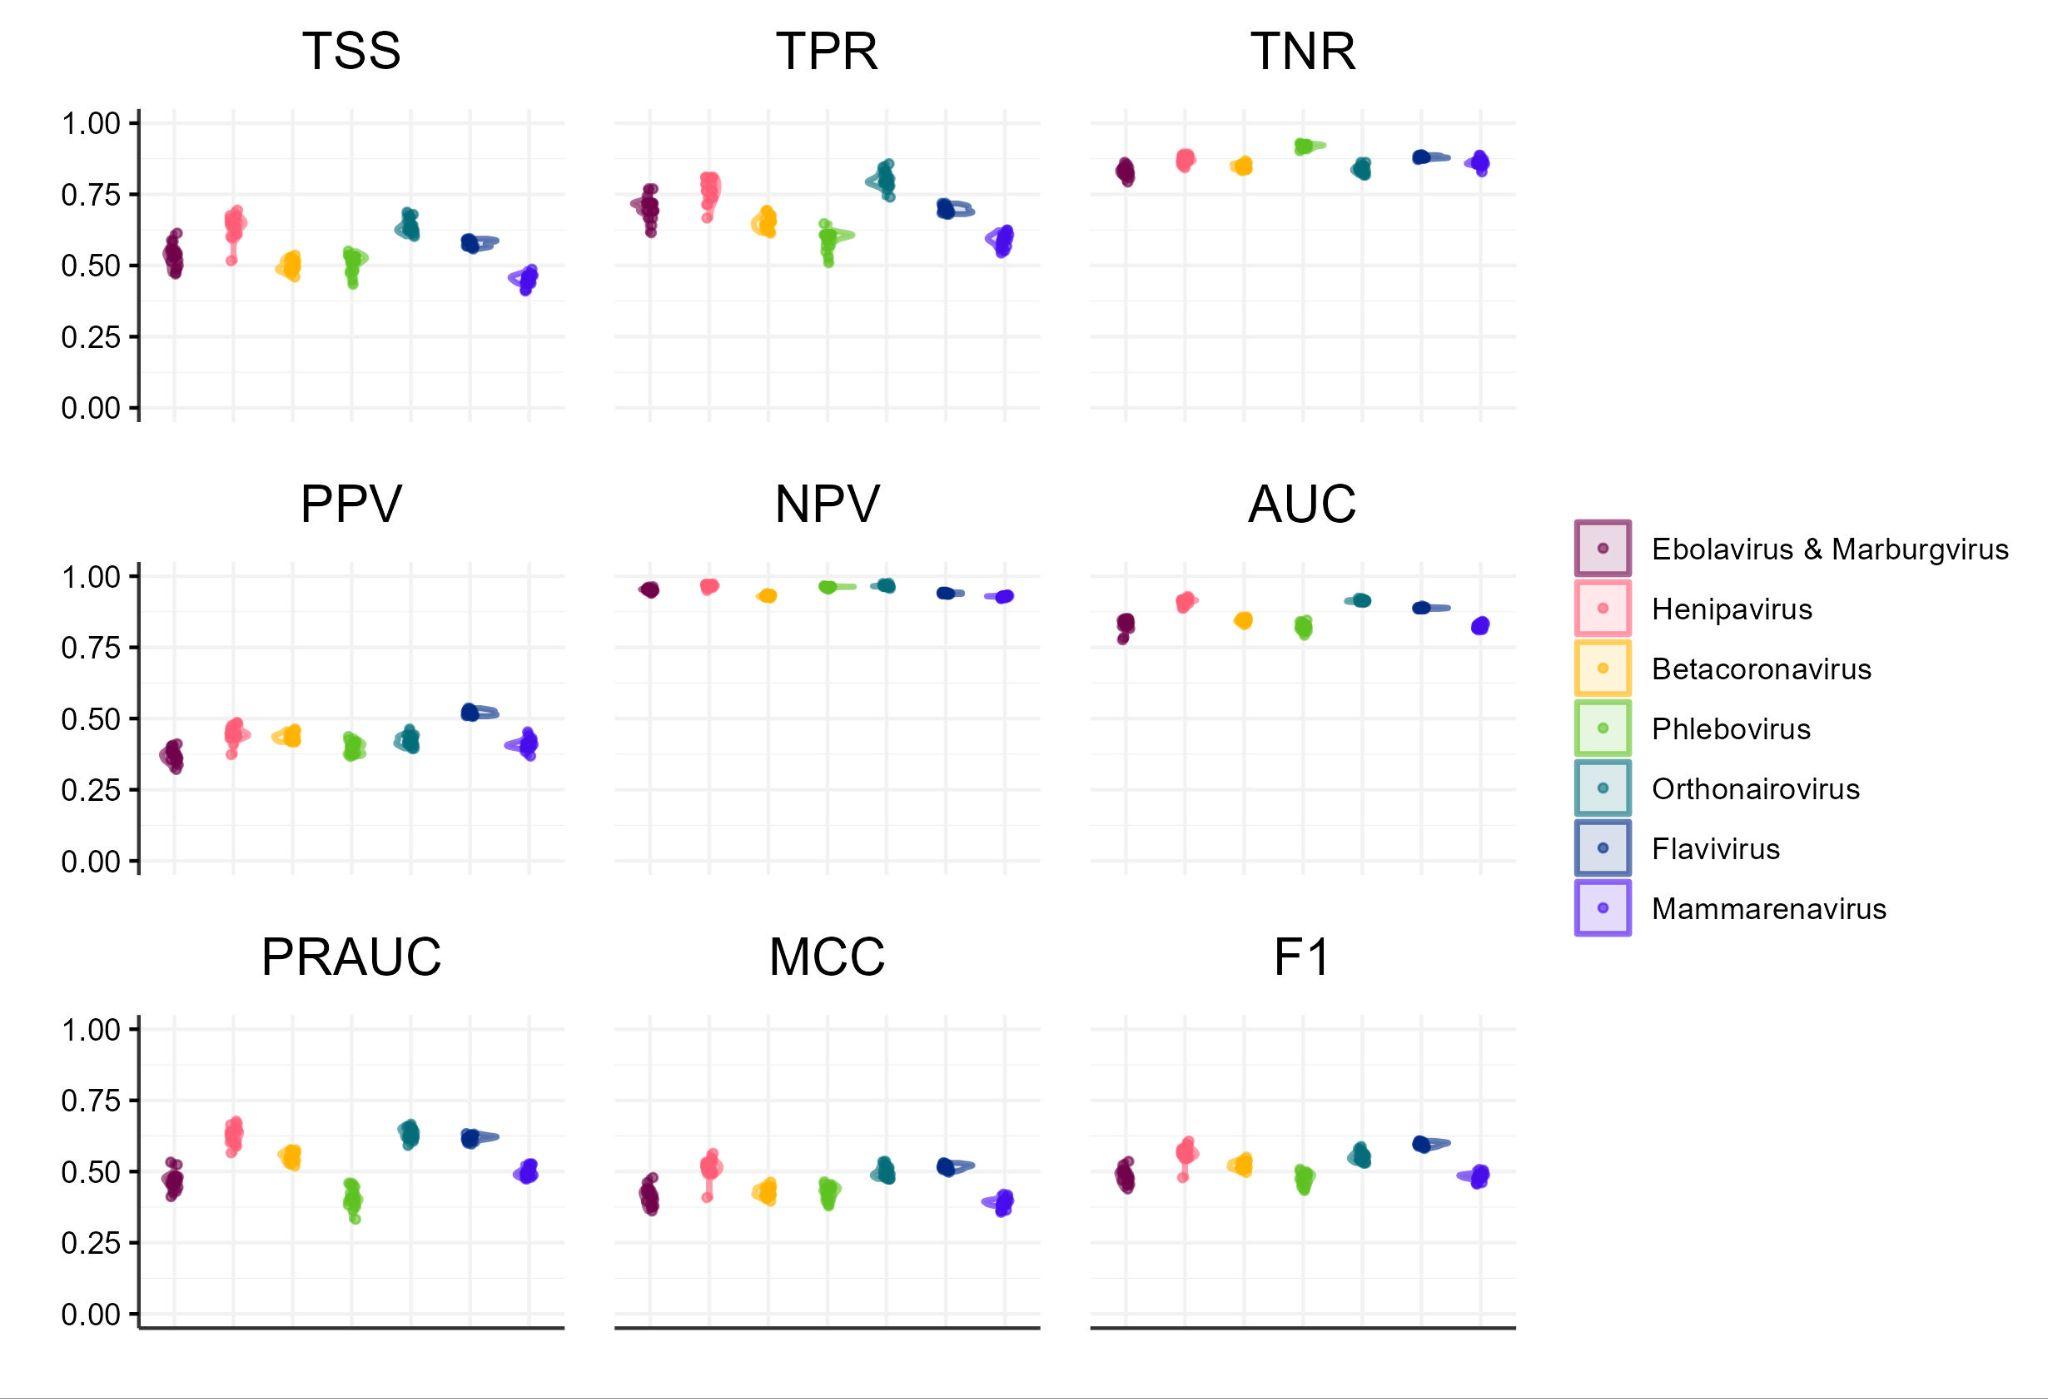


Supplementary Figure 1 Estimates of performance metrics resulting from 20 repetitions of the nested cross validation routine. TSS: True Skill Statistic; TPR: True Positive Rate (Recall); TNR: True Negative Rate; PPV: Positive Predicted Values (Precision); NPV: Negative Predicted Values; AUC: Area Under the Curve; PRAUC: Area Under the Precision Recall Curve; MCC: Matthew’s Correlation Coefficient; F1: F1 score. Performance metrics are described in Table S1.


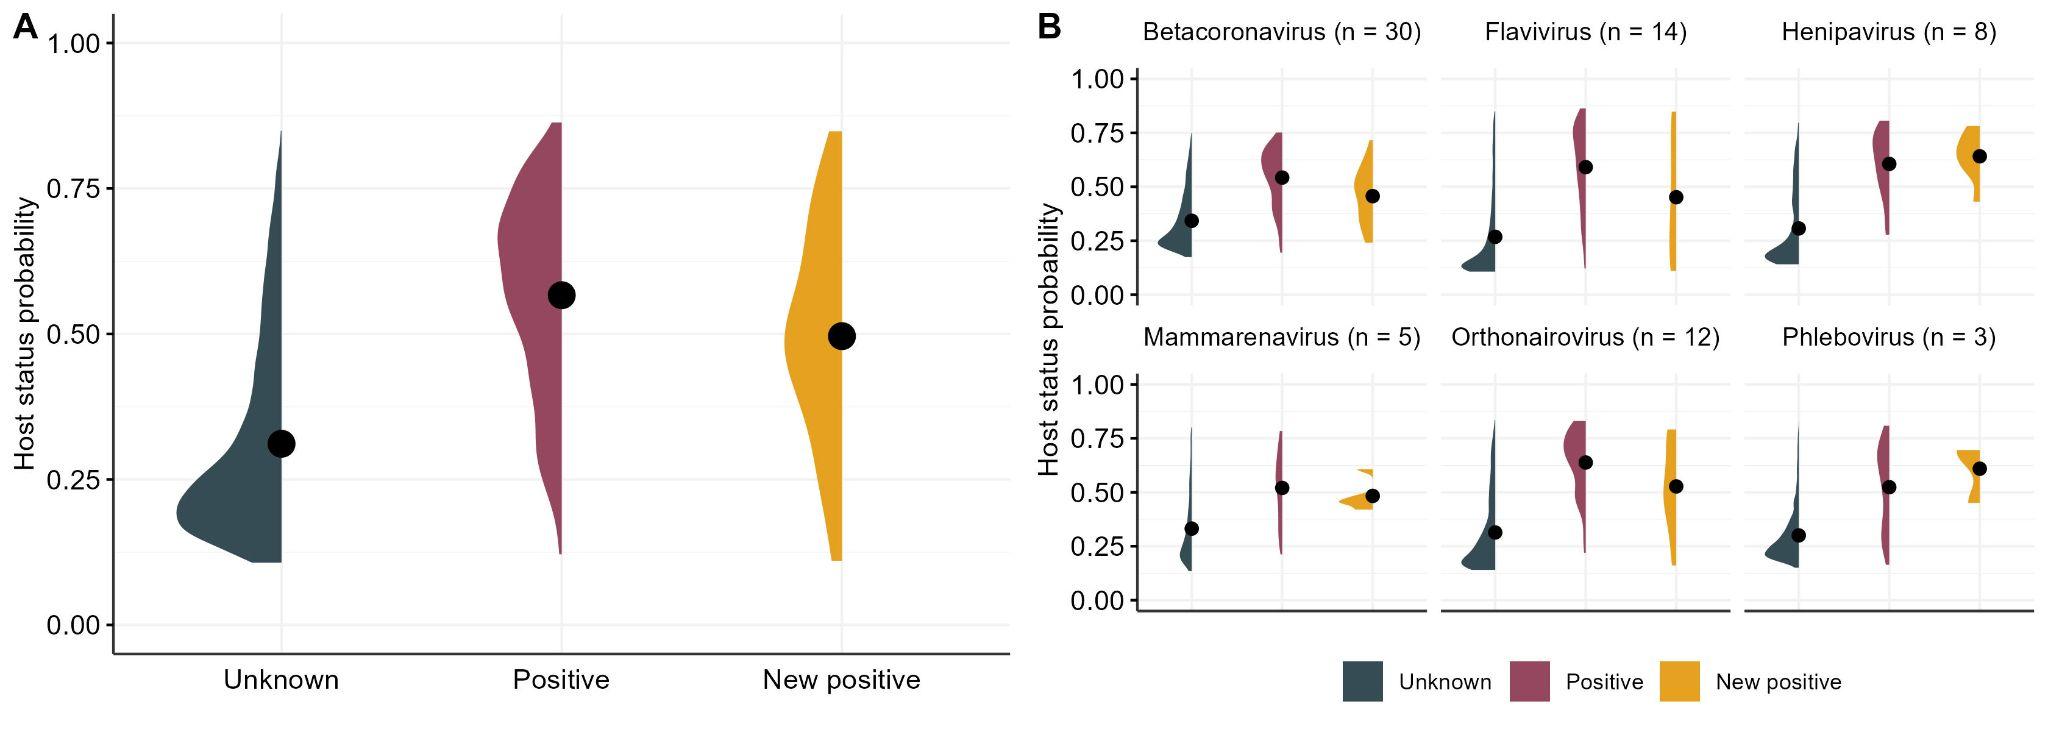


Supplementary Figure 2 Comparison of the distribution of host status probabilities for mammals with unknown status, positive status and newly-identified positives (n = 72) summarised across all viral groups (A) and separated between groups (B). No novel associations were found for *Ebola* & *Marburgvirus*. The model ensemble assigned significantly higher host probabilities to new positive species compared to a set of species with unknown status (Wilcoxon signed-rank test statistic = 14,172,169; *p* < 0.001).


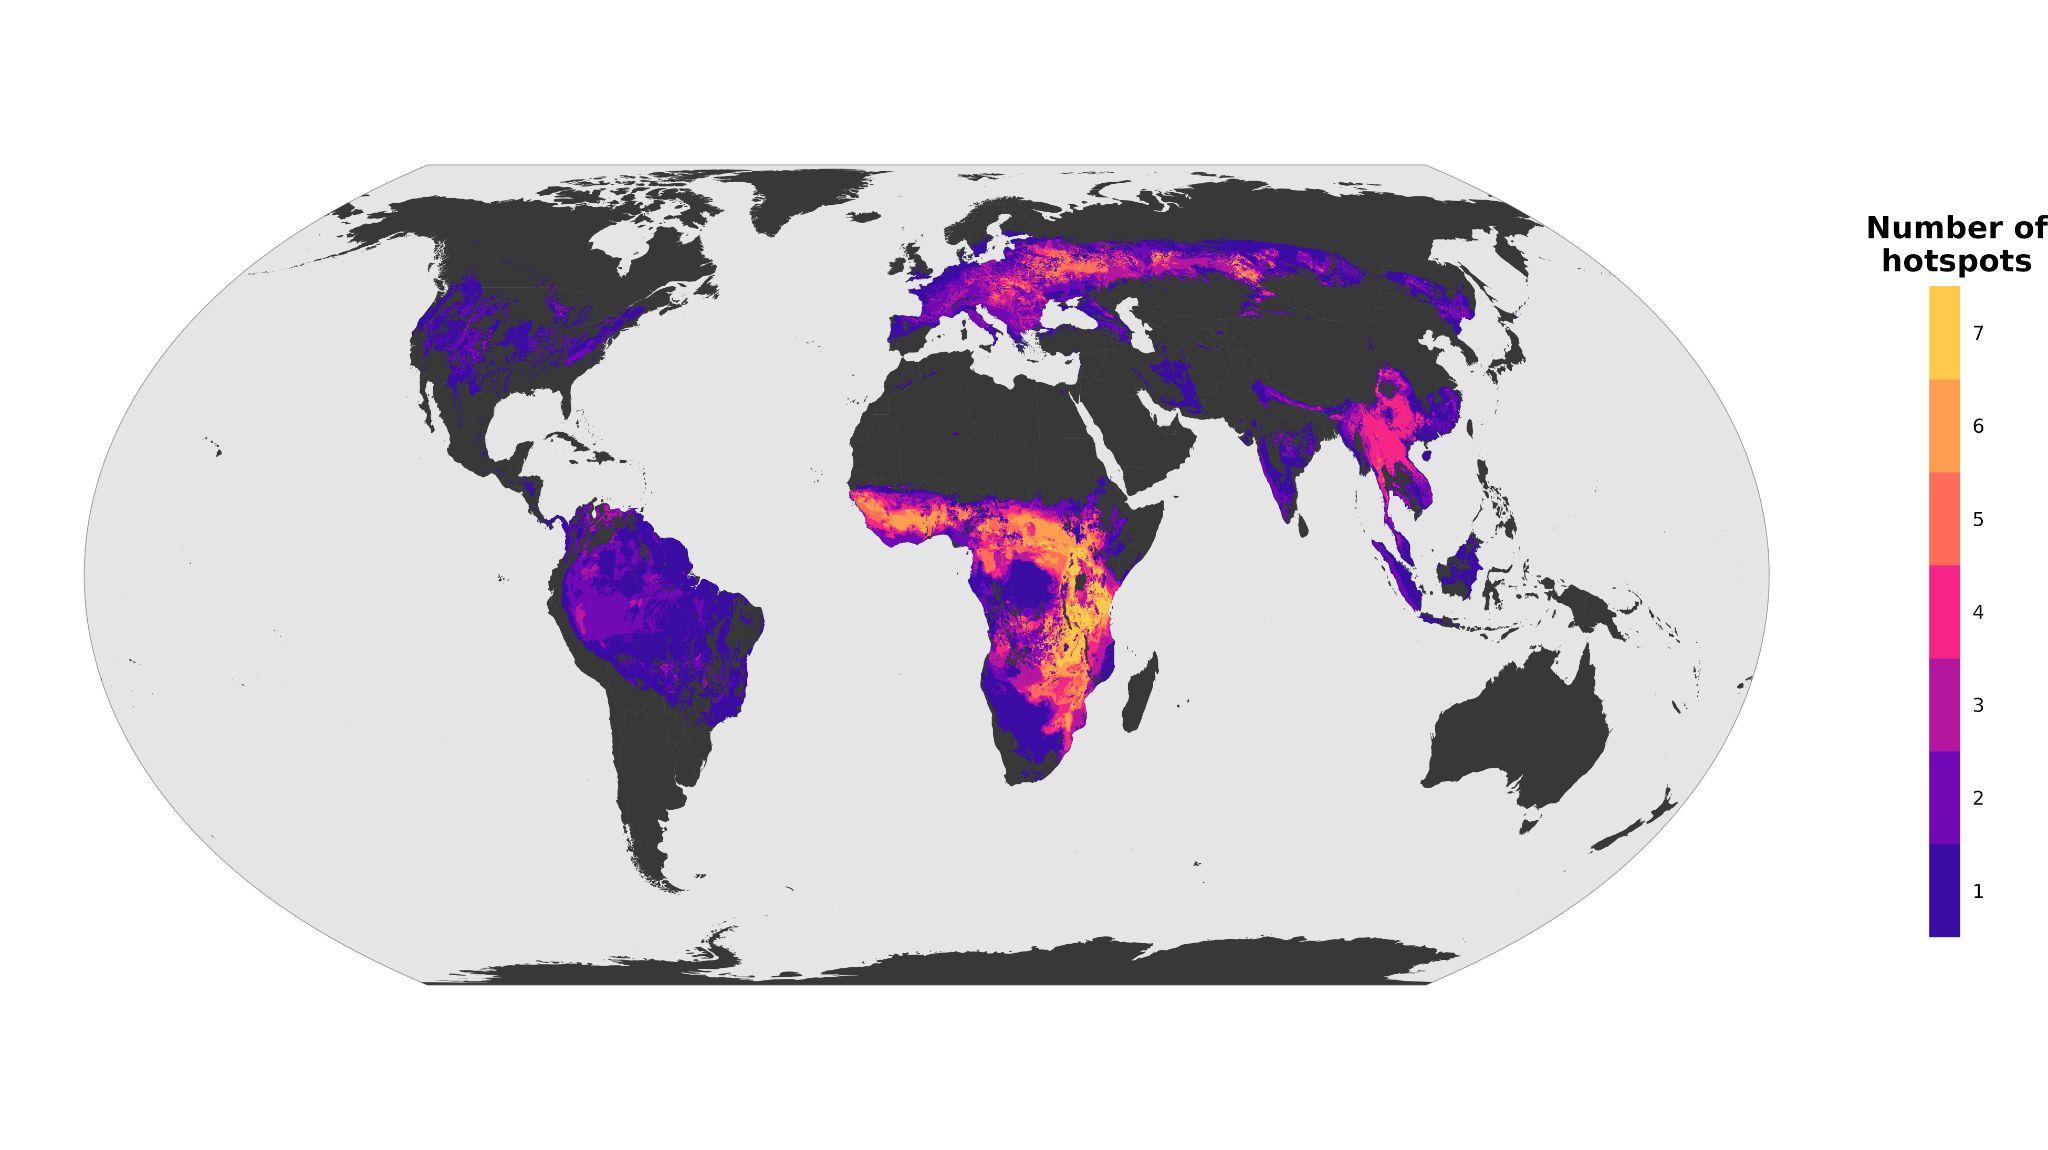


Supplementary Figure 3 Cumulative global hazard hotspots of high-priority viruses. Each grid cell in the map represents the cumulative number of overlapping zoonotic hazard hotspots, defined as 10 km×10 km cells where host richness falls within the global top 10% for a given viral group.


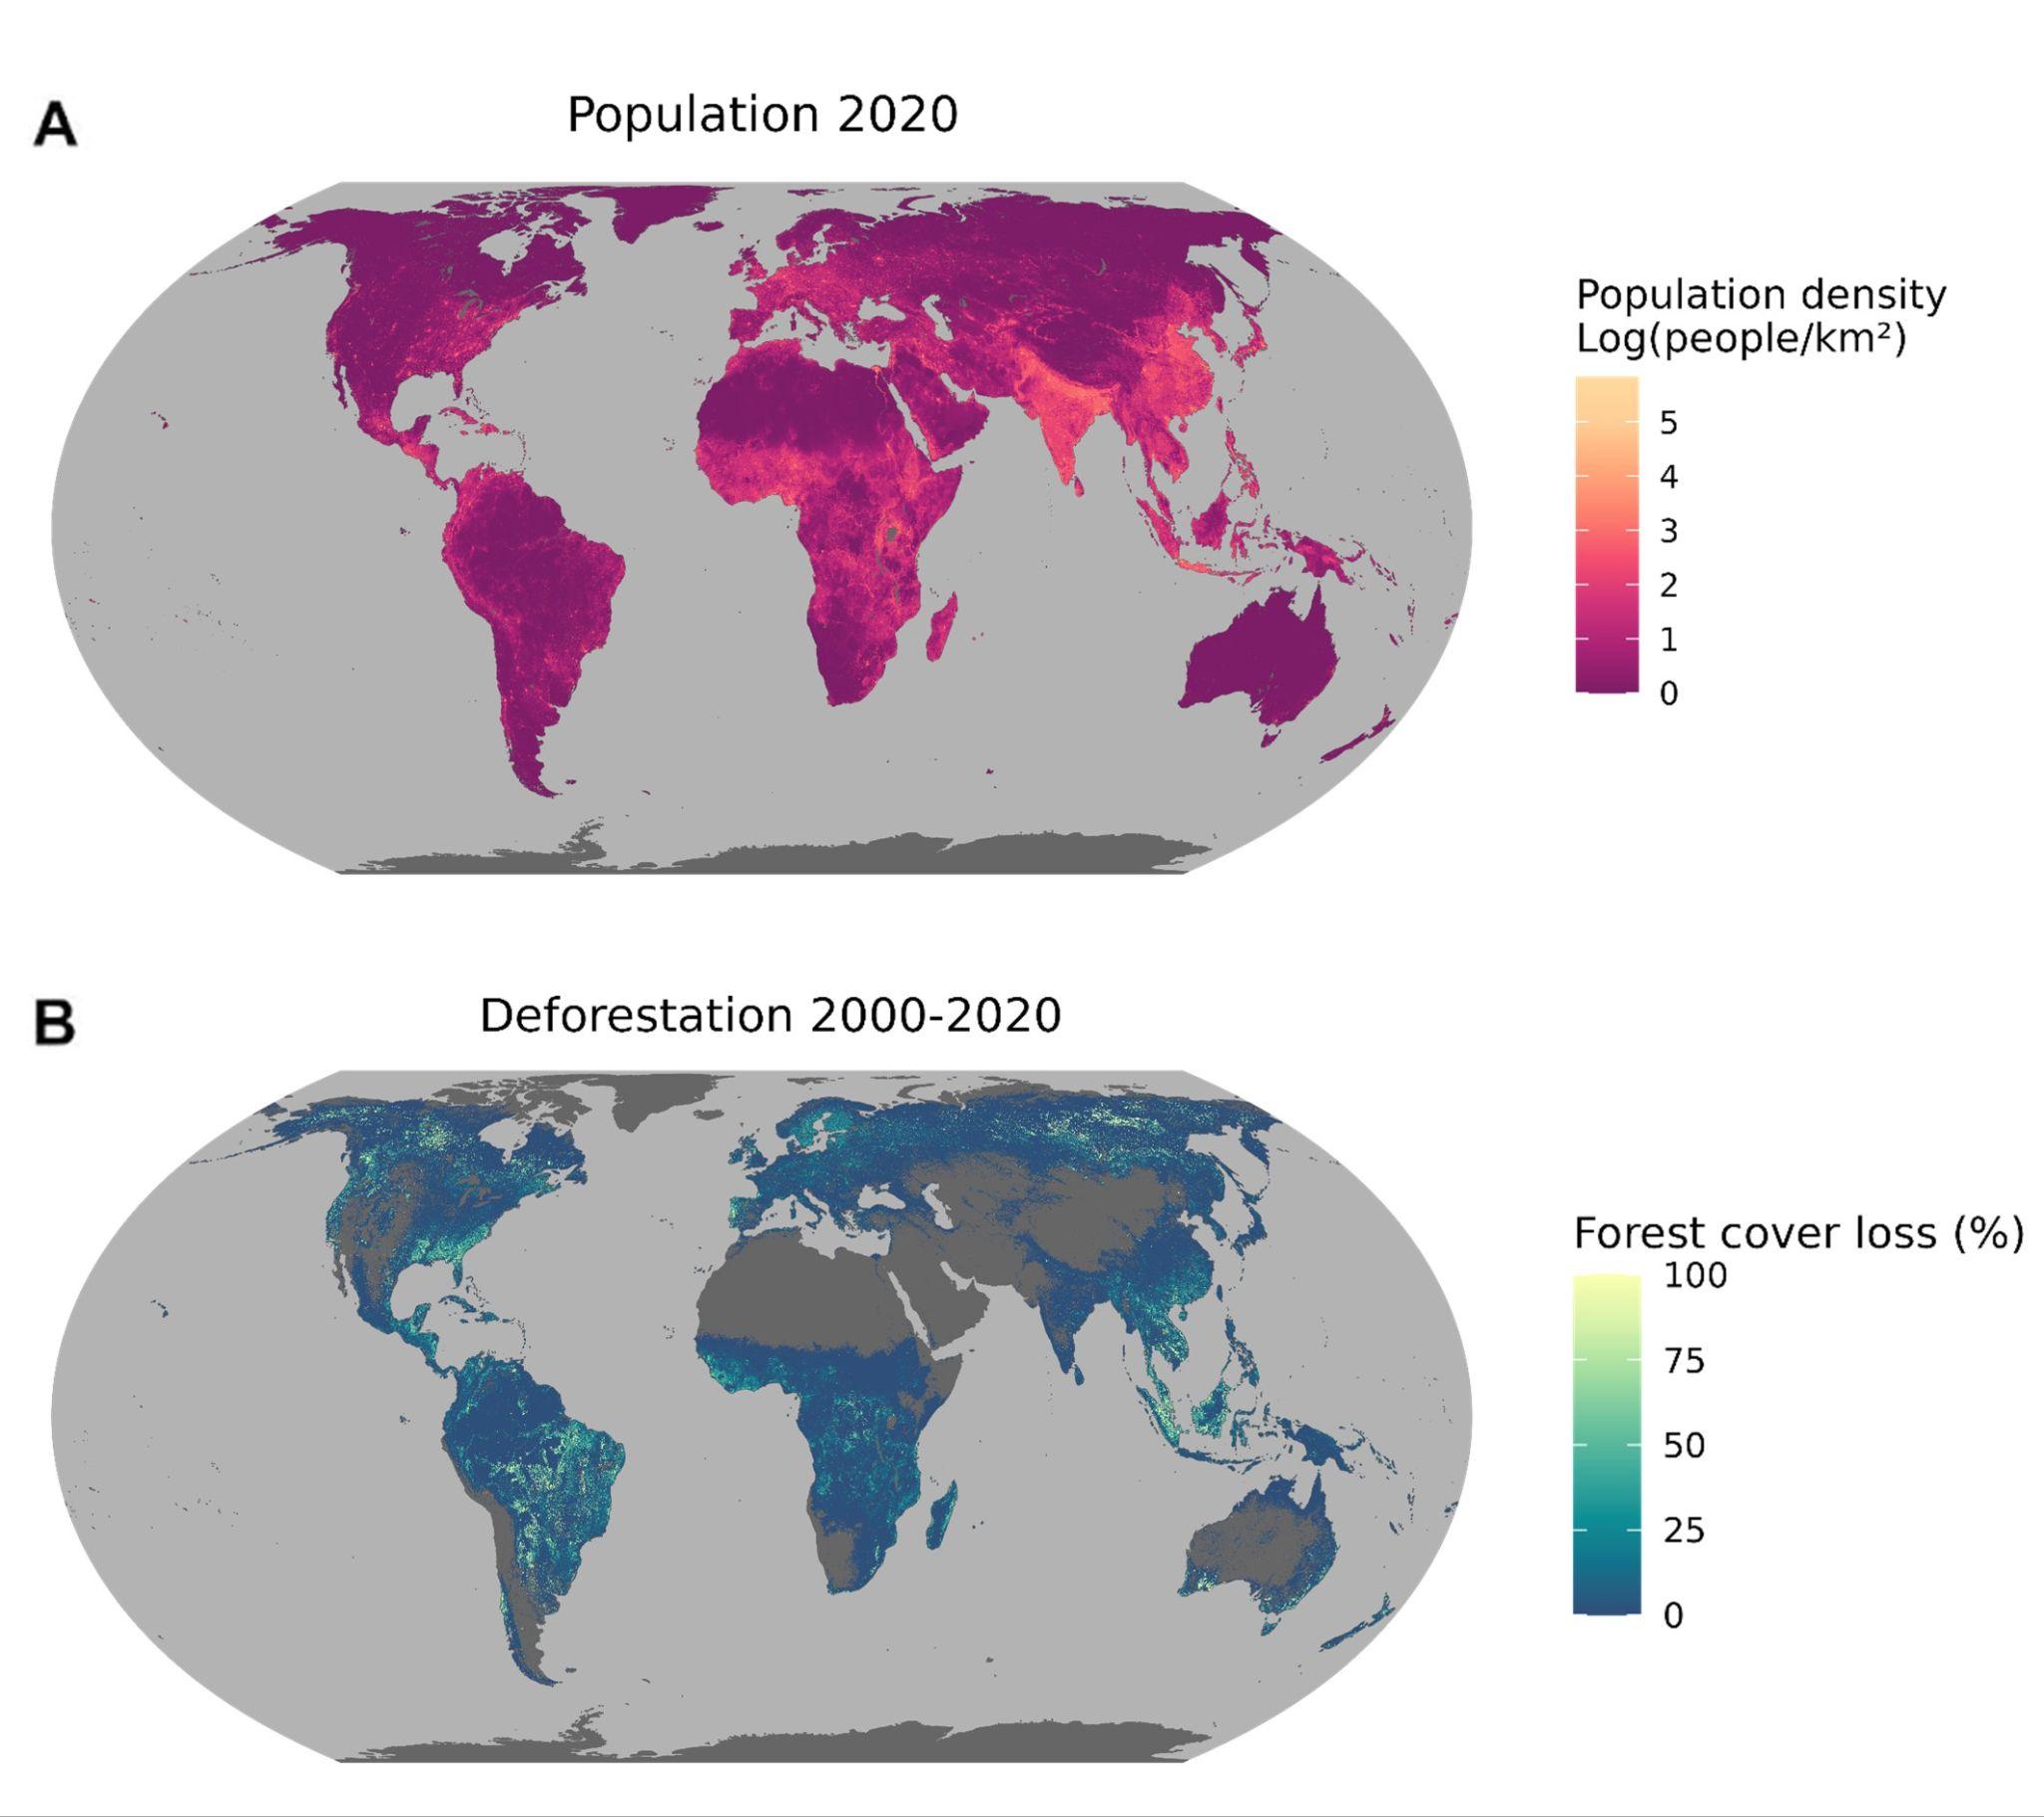


Supplementary Figure 4 Drivers of zoonotic spillover used to identify anthropogenic pressures within predicted hazard hotspots. Maps are at a spatial resolution of 1km. Population density in 2020 (A) was sourced from WorldPop and CIESIN, 2020. The pixel-level forest cover loss in the 2000-2020 period (B) was calculated from forest cover maps sourced from (1).

Supplementary Table 2 List of excluded flaviviruses for which mammals are generally considered incidental or dead-end hosts.

| ***Flavivirus* species** | **Primary hosts/reservoirs** | **Reference** |
| --- | --- | --- |
| Ilheus virus | Birds | (3) |
| Israel turkey meningoencephalomyelitis virus | Birds | (4) |
| Japanese encephalitis virus | Birds | (5) |
| Saint louis encephalitis virus | Birds | (6) |
| Tembusu virus | Birds | (7) |
| Usutu virus | Birds | (8) |
| West nile virus | Birds | (9) |

Supplementary Table 1 Description of performance metrics used to assess the models. (TN = True negatives, TP = True positives, FN = False negatives, FP = False positives). Sourced from (2).

| Metric | Formula | Description |
| --- | --- | --- |
| TSS |  | True Skill Statistic. Combines specificity and sensitivity. Ranges from -1 to 1, where 0 is the performance of a random classifier. |
| TNR |  | Proportion of negatives correctly classified. Ranges from 0 to 1, where 0.5 is the performance of a random classifier. |
| TPR |  | Proportion of positives correctly classified. Ranges from 0 to 1, where 0.5 is the performance of a random classifier. |
| MCC |  | Matthew’s Correlation Coefficient between true and predicted class. Ranges from -1 to 1, where 0 is the performance of a random classifier. |
| PPV |  | Proportion of true positives among predicted positives. Ranges from 0 to 1. The performance of a random classifier is equal to the proportion of positives in the data. |
| NPV |  | Proportion of true negatives among predicted negatives. Ranges from 0 to 1. The performance of a random classifier is equal to the proportion of negatives in the data. |
| F1 |  | F1 score is calculated as the harmonic mean of precision and recall. Ranges from 0 to 1 and is sensitive to class imbalance. |
| AUC | Area under the ROC curve | Indicates the model's ability to classify positive and negative instances and is calculated based on TPR and FPR. |
| PRAUC | Area under the Precision-Recall curve | Indicates the model's ability to classify positive instances and is calculated based on the TPR and PPV. |

Supplementary Dataset 1 Data sources used for classifying host species in high and low- evidence hosts. Provided as a separate file.

Supplementary Dataset 2 New positive associations based on viral species-level isolation or PCR evidence extracted from Genbank (10) from January 2022 to September 2024. Provided as a separate file.

**Supplementary references**

1. M. C. Hansen, *et al.*, High-resolution global maps of 21st-century forest cover change. *Science (1979)* 342 (2013).

2. A. Tonelli, M. S. C. Blagrove, M. Wardeh, M. Di Marco, A framework to predict zoonotic hosts under data uncertainty: A case study on betacoronaviruses. *Methods Ecol Evol* (2025).

3. K. S. Plante, *et al.*, Potential of Ilhéus virus to emerge. *Heliyon* 10 (2024).

4. J. Fernández-Pinero, *et al.*, Bagaza virus and Israel Turkey meningoencephalomyelitis virus are a single virus species. *Journal of General Virology* 95 (2014).

5. Z. A. Levesque, M. G. Walsh, C. E. Webb, R. N. Zadoks, V. J. Brookes, A scoping review of evidence of naturally occurring Japanese encephalitis infection in vertebrate animals other than humans, ardeid birds and pigs. *PLoS Negl Trop Dis* 18, e0012510 (2024).

6. A. Kopp, *et al.*, Provenance and geographic spread of St. Louis encephalitis virus. *mBio* 4 (2013).

7. H.-J. Wang, *et al.*, In vitro and in vivo characterization of chimeric duck Tembusu virus based on Japanese encephalitis live vaccine strain SA14-14-2. *Journal of General Virology* 97, 1551–1556 (2016).

8. F. Roesch, G. Moratorio, G. Moratorio, M. Vignuzzi, Usutu virus: An arbovirus on the rise. *Viruses* [Preprint] (2019).

9. R. A. Bowen, N. M. Nemeth, Experimental infections with West Nile virus. *Curr Opin Infect Dis* [Preprint] (2007).

10. D. A. Benson, *et al.*, GenBank. *Nucleic Acids Res* 41 (2013).
